# Supplementary material for: Supplemental oxygen strategies in infants with bronchopulmonary dysplasia after the neonatal intensive care unit period: study protocol for a randomised controlled trial (SOS BPD study)
Source: PubMed Central journal article supplement — BMJ Open. 2022 Jul 8;12(7):e060986. doi: 10.1136/bmjopen-2022-060986 (PMC9272124; doi:10.1136/bmjopen-2022-060986), 2022-07-08
Supplement: bmjopen-2022-060986.draft_revisions.pdf [file bmjopen-2022-060986.draft_revisions.pdf]

# BMJ Open

BMJ Open is committed to open peer review. As part of this commitment we make the peer review history of every article we publish publicly available.

When an article is published we post the peer reviewers' comments and the authors' responses online. We also post the versions of the paper that were used during peer review. These are the versions that the peer review comments apply to.

The versions of the paper that follow are the versions that were submitted during the peer review process. They are not the versions of record or the final published versions. They should not be cited or distributed as the published version of this manuscript.

BMJ Open is an open access journal and the full, final, typeset and author-corrected version of record of the manuscript is available on our site with no access controls, subscription charges or pay-per-view fees (<http://bmjopen.bmj.com>).

If you have any questions on BMJ Open's open peer review process please email [info.bmjopen@bmj.com](mailto:info.bmjopen@bmj.com)

# BMJ Open

## Supplemental oxygen strategies in infants with bronchopulmonary dysplasia after the Neonatal Intensive Care Unit period: study protocol for a randomised controlled trial (SOS BPD study)

|                               |                                                                                                                                                                                                                                                                                                                                                                                                                                                                                                                                                                                                                                                                                                                                                                                                                                                                                                                                                                                                                                                                                                                                                                                                                                                                                                                                                                                                                                                                                                                                                                                                                                                                                                                 |
|-------------------------------|-----------------------------------------------------------------------------------------------------------------------------------------------------------------------------------------------------------------------------------------------------------------------------------------------------------------------------------------------------------------------------------------------------------------------------------------------------------------------------------------------------------------------------------------------------------------------------------------------------------------------------------------------------------------------------------------------------------------------------------------------------------------------------------------------------------------------------------------------------------------------------------------------------------------------------------------------------------------------------------------------------------------------------------------------------------------------------------------------------------------------------------------------------------------------------------------------------------------------------------------------------------------------------------------------------------------------------------------------------------------------------------------------------------------------------------------------------------------------------------------------------------------------------------------------------------------------------------------------------------------------------------------------------------------------------------------------------------------|
| Journal:                      | <i>BMJ Open</i>                                                                                                                                                                                                                                                                                                                                                                                                                                                                                                                                                                                                                                                                                                                                                                                                                                                                                                                                                                                                                                                                                                                                                                                                                                                                                                                                                                                                                                                                                                                                                                                                                                                                                                 |
| Manuscript ID                 | bmjopen-2022-060986                                                                                                                                                                                                                                                                                                                                                                                                                                                                                                                                                                                                                                                                                                                                                                                                                                                                                                                                                                                                                                                                                                                                                                                                                                                                                                                                                                                                                                                                                                                                                                                                                                                                                             |
| Article Type:                 | Protocol                                                                                                                                                                                                                                                                                                                                                                                                                                                                                                                                                                                                                                                                                                                                                                                                                                                                                                                                                                                                                                                                                                                                                                                                                                                                                                                                                                                                                                                                                                                                                                                                                                                                                                        |
| Date Submitted by the Author: | 17-Feb-2022                                                                                                                                                                                                                                                                                                                                                                                                                                                                                                                                                                                                                                                                                                                                                                                                                                                                                                                                                                                                                                                                                                                                                                                                                                                                                                                                                                                                                                                                                                                                                                                                                                                                                                     |
| Complete List of Authors:     | <p>Balink, Stephanie; Erasmus MC Sophia Children Hospital, Paediatrics/Paediatric Respiratory Medicine<br/> Onland, Wes; Amsterdam UMC Locatie AMC, Department of Paediatrics, Division of Neonatology; Amsterdam UMC Locatie VUmc, Department of Paediatrics, Division of Neonatology<br/> Vrijlandt, Elianne; UMCG, Department of Paediatrics, Division of Paediatric Pulmonology and Allergology<br/> Andrinopoulou, Eleni-Rosalina; Erasmus Medical Center, Department of Biostatistics, Department of Epidemiology<br/> Bos, Arend; UMCG, Department of Paediatrics, Division of Neonatology<br/> Dijk, Peter; UMCG, Department of Paediatrics, Division of Neonatology<br/> Goossens, Lucas; Erasmus Universiteit Rotterdam Erasmus School of Health Policy and Management<br/> Hulsmann, Anthon; Amphia Hospital, Department of Paediatrics<br/> Nuytemans, Debbie; Amsterdam UMC Locatie AMC, Department of Paediatrics, Division of Neonatology; Amsterdam UMC Locatie VUmc, Department of Paediatrics, Division of Neonatology<br/> Reiss, Irwin; Erasmus MC Sophia Children Hospital, Paediatrics, Division of neonatology<br/> Sprij, Arwen; Haga Hospital, Department of Paediatrics<br/> Kroon, André; Erasmus MC Sophia Children Hospital, Department of Paediatrics, Division of Neonatology<br/> van Kaam, Anton; Amsterdam UMC Locatie AMC, Department of Paediatrics, Division of Neonatology; Amsterdam UMC Locatie VUmc, Department of Paediatrics, Division of Neonatology<br/> Pijnenburg, Marielle; Erasmus MC Sophia Children Hospital, Department of Paediatrics/ Paediatric Respiratory Medicine<br/> the SOS BPD study group, on behalf of; Erasmus MC Sophia Children Hospital</p> |
| Keywords:                     | Neonatal intensive & critical care < INTENSIVE & CRITICAL CARE, NEONATOLOGY, Paediatric thoracic medicine < PAEDIATRICS                                                                                                                                                                                                                                                                                                                                                                                                                                                                                                                                                                                                                                                                                                                                                                                                                                                                                                                                                                                                                                                                                                                                                                                                                                                                                                                                                                                                                                                                                                                                                                                         |
|                               |                                                                                                                                                                                                                                                                                                                                                                                                                                                                                                                                                                                                                                                                                                                                                                                                                                                                                                                                                                                                                                                                                                                                                                                                                                                                                                                                                                                                                                                                                                                                                                                                                                                                                                                 |

1  
2  
3  
4  
5  
6  
7  
8  
9  
10  
11  
12  
13  
14  
15  
16  
17  
18  
19  
20  
21  
22  
23  
24  
25  
26  
27  
28  
29  
30  
31  
32  
33  
34  
35  
36  
37  
38  
39  
40  
41  
42  
43  
44  
45  
46  
47  
48  
49  
50  
51  
52  
53  
54  
55  
56  
57  
58  
59  
60

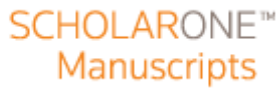

1  
2  
3 **1 Supplemental oxygen strategies in infants with bronchopulmonary dysplasia after the**  
4  
5 **2 Neonatal Intensive Care Unit period: study protocol for a randomised controlled trial**  
6  
7  
8 **3 (SOS BPD study)**  
9

10 4 S.J.A. Balink<sup>1</sup>, W. Onland<sup>2</sup>, E.J.L.E. Vrijlandt<sup>3</sup>, E.R. Andrinopoulou<sup>4</sup>, A.F. Bos<sup>5</sup>, P.H. Dijk<sup>5</sup>, L.M.A. Goossens<sup>6</sup>,  
11  
12 5 A.R. Hulsmann<sup>7</sup>, D.H. Nuytemans<sup>2</sup>, I.K.M. Reiss<sup>8</sup>, A.J. Sprij<sup>9</sup>, A.A. Kroon<sup>8</sup>, A.H. van Kaam<sup>2</sup>, M.W.H.  
13  
14 6 Pijnenburg<sup>1</sup>, on behalf of the SOS BPD study group  
15  
16 7

17  
18 8 <sup>1</sup>Department of Paediatrics/ Paediatric Respiratory Medicine, Erasmus MC – Sophia Children’s Hospital, University Medical  
19  
20 9 Center Rotterdam, Dr. Molewaterplein 40, 3015 GD Rotterdam, the Netherlands

21  
22 10 <sup>2</sup>Department of Paediatrics, Division of Neonatology, Amsterdam University Medical Centers, University of Amsterdam,  
23  
24 11 VU Medical Center, Emma Children’s Hospital, Meibergdreef 9, 1105 AZ Amsterdam-Zuidoost, The Netherlands

25  
26 12 <sup>3</sup>Department of Paediatrics, Division of Paediatric Pulmonology and Allergology, University Medical Centre Groningen,  
27  
28 13 Beatrix Children’s Hospital, Hanzeplein 1, 9713 GZ Groningen, The Netherlands

29  
30 14 <sup>4</sup>Department of Biostatistics, Department of Epidemiology, Erasmus Medical Center, University Medical Center, Rotterdam,  
31  
32 15 The Netherlands

33  
34 16 <sup>5</sup>Department of Paediatrics, Division of Neonatology, University Medical Centre Groningen, Beatrix Children’s Hospital,  
35  
36 17 Hanzeplein 1, 9713 GZ Groningen, The Netherlands

37  
38 18 <sup>6</sup>Erasmus School for Health Policy & Management, Erasmus University Rotterdam, P.O. Box 1738, 3000 DR Rotterdam  
39  
40 19 3000, the Netherlands

41  
42 20 <sup>7</sup>Department of Paediatrics, Amphia Hospital, Molengracht 21, 4818 CK Breda, The Netherlands

43  
44 21 <sup>8</sup>Department of Paediatrics, Division of Neonatology, Erasmus MC – Sophia Children’s Hospital, University Medical Center  
45  
46 22 Rotterdam, Dr. Molewaterplein 40, 3015 GD Rotterdam, the Netherlands

47  
48 23 <sup>9</sup>Department of Paediatrics, Haga Hospital, Els Borst-Eilersplein 275, 2545 AA The Hague, the Netherlands  
49  
50 24

51  
52 **25 Corresponding author:**

53  
54 26 Marielle W.H. Pijnenburg, email: [m.pijnenburg@erasmusmc.nl](mailto:m.pijnenburg@erasmusmc.nl). Department of Paediatrics/  
55  
56 27 Paediatric Respiratory Medicine, Erasmus MC – Sophia Children’s Hospital, University  
57  
58 28 Medical Center Rotterdam, Room SP-2430, P.O. Box 2060, 3000 CB Rotterdam  
59  
60 29

30 **Word count: 3672**

1  
2  
3  
4  
5  
6  
7  
8  
9  
10  
11  
12  
13  
14  
15  
16  
17  
18  
19  
20  
21  
22  
23  
24  
25  
26  
27  
28  
29  
30  
31  
32  
33  
34  
35  
36  
37  
38  
39  
40  
41  
42  
43  
44  
45  
46  
47  
48  
49  
50  
51  
52  
53  
54  
55  
56  
57  
58  
59  
60

31

32 **Keywords**

33 Bronchopulmonary dysplasia, prematurity, supplemental oxygen, growth, weight, lung  
34 function, oxygen saturation

For peer review only

1  
2  
3 **35 ABSTRACT**  
4

5 **36 Introduction:** Supplemental oxygen is the most important treatment for preterm born infants  
6  
7  
8 **37** with established bronchopulmonary dysplasia (BPD). However, it is unknown what oxygen  
9  
10 **38** saturation levels are optimal to improve outcomes in infants with established BPD from 36  
11  
12 **39** weeks postmenstrual age (PMA) onwards. The aim of this study is to compare the use of a  
13  
14 **40** higher oxygen saturation limit ( $\geq 95\%$ ) to a lower oxygen saturation limit ( $\geq 90\%$ ) after 36  
15  
16 **41** weeks PMA in infants diagnosed with moderate or severe BPD.

17  
18  
19 **42 Methods and analysis:** This non-blinded, multicentre, randomised controlled trial will  
20  
21 **43** recruit 198 preterm born infants with moderate or severe BPD between 36 and 38 weeks  
22  
23 **44** PMA. Infants will be randomised to either a lower oxygen saturation limit of 95% or to a  
24  
25 **45** lower limit of 90%; supplemental oxygen and/or respiratory support will be weaned based on  
26  
27 **46** the assigned lower oxygen saturation limit. Adherence to the oxygen saturation limit will be  
28  
29 **47** assessed by extracting oxygen saturation profiles from pulse oximeters regularly, until  
30  
31 **48** respiratory support is stopped. The primary outcome is the weight standard deviation score at  
32  
33 **49** six months corrected age. Secondary outcomes include anthropometrics collected at six and  
34  
35 **50** twelve months corrected age, re-hospitalizations, respiratory complaints, infant stress,  
36  
37 **51** parental quality of life and cost-effectiveness.

38  
39  
40 **52 Ethics and dissemination:** Ethical approval for the trial was obtained from the Medical  
41  
42 **53** Ethics Review Committee of the Erasmus University Medical Centre, Rotterdam, the  
43  
44 **54** Netherlands (MEC-2018-1515). Local approval for conducting the trial in the participating  
45  
46 **55** hospitals has been, or will be obtained from the local institutional review boards. Informed  
47  
48 **56** consent will be obtained from the parents or legal guardians of all study participants.

49  
50  
51 **57 Trial registration:** Dutch Trial Registry ([www.trialregister.nl](http://www.trialregister.nl)): NL7149 / NTR7347;  
52  
53  
54 **58** registered on July 10, 2018.  
55  
56  
57

58  
59  
60

1  
2  
3 60 **ARTICLE SUMMARY**  
4

5 61 **Strengths and limitations of this study**  
6

- 7  
8 62 • This is the first randomised controlled trial that aims to identify the optimal lower  
9  
10 63 limit of oxygen saturation for infants with moderate or severe bronchopulmonary  
11  
12 64 dysplasia to improve growth and respiratory health.  
13  
14  
15 65 • Adherence to the assigned limit for weaning supplemental oxygen will be increased  
16  
17 66 by collecting oxygen saturation profiles twice (in hospital) or once (at home) weekly.  
18  
19 67 • Limitations of this study are that the study is not blinded and that protocols amongst  
20  
21 68 the participating centres to wean oxygen or respiratory support are not standardized.  
22  
23  
24  
25  
26  
27  
28  
29  
30  
31  
32  
33  
34  
35  
36  
37  
38  
39  
40  
41  
42  
43  
44  
45  
46  
47  
48  
49  
50  
51  
52  
53  
54  
55  
56  
57  
58  
59  
60

## 69 INTRODUCTION

70 Bronchopulmonary dysplasia (BPD) is the most common complication of extreme preterm  
71 birth. The pathogenesis of BPD is complex and multifactorial: pre- and postnatal risk factors  
72 such as intrauterine growth restriction, pregnancy-related hypertensive disorders, mechanical  
73 ventilation and infections all may impact on the immature, developing lungs of extremely  
74 preterm infants.(1) As a consequence, there is an arrest in lung development characterized by  
75 a decreased number of alveoli, which are larger and simplified, combined with small airway  
76 injury and abnormal development of the pulmonary vasculature.(2) Despite advances in  
77 perinatal and neonatal care, the incidence of BPD remains high, affecting almost half of  
78 infants born <28 weeks' gestation who survived to 36 weeks' postmenstrual age (PMA).(3)  
79 Infants with BPD may experience poor respiratory health and impaired lung function  
80 throughout childhood, even persisting into adulthood.(4, 5) Particularly the first years of life  
81 are characterized by prolonged use of supplemental oxygen, frequent respiratory symptoms  
82 and an increased risk of hospitalization.(6, 7) Having a child with BPD also poses an  
83 important burden on family life and is associated with a decreased quality of life of  
84 caregivers.(8)

85  
86 Supplemental oxygen is the most important treatment for preterm infants with established  
87 BPD. It reduces respiratory symptoms, reduces or prevents pulmonary hypertension and has  
88 possible beneficial effects on growth and neurodevelopment.(9) However, no study has ever  
89 examined the optimal oxygen saturation (SpO<sub>2</sub>) target in children with established BPD,  
90 while both too little and too much oxygen may lead to serious adverse events.(10) Few  
91 guidelines include recommendations for SpO<sub>2</sub> levels in infants with BPD. The European  
92 Respiratory Society guideline on long term management of children with BPD suggests the  
93 use of a lower limit of SpO<sub>2</sub> of 90% when using supplemental oxygen.(11) The American



94 Thoracic Society Guideline on home oxygen therapy suggests a level of 93% as minimum  
 95 threshold.(12) However, the level of evidence supporting these recommendations is low. This  
 96 has led to substantial practice variation in the applied SpO<sub>2</sub> limits in infants with BPD still  
 97 receiving respiratory support and/or supplemental oxygen after 36 weeks PMA.

98

99 In contrast to the limited evidence available *after* 36 weeks PMA, optimal SpO<sub>2</sub> targets have  
 100 been extensively studied in preterm infants *before* the age of 36 weeks PMA. The  
 101 Supplemental Therapeutic Oxygen for Prethreshold Retinopathy Of Prematurity (STOP-  
 102 ROP) trial, the Benefits Of Oxygen Saturation Targeting (BOOST) trial and the Neonatal  
 103 Oxygen Prospective Meta-analysis (NeOProM) Collaboration (including 5 randomised  
 104 controlled trials) all compared different SpO<sub>2</sub> targets in preterm infants before 36 weeks  
 105 PMA.(13-15) All trials studied slightly different SpO<sub>2</sub> target ranges (Table 1).

106

107 **Table 1. SpO<sub>2</sub> target ranges in different trials (13-15)**

| Trial                 | Lower SpO <sub>2</sub> range | Higher SpO <sub>2</sub> range |
|-----------------------|------------------------------|-------------------------------|
| STOP-ROP trial        | 89 – 94%                     | 96 – 99%                      |
| BOOST trial           | 91 – 94%                     | 95 – 98%                      |
| NeOProM Collaboration | 85 – 89%                     | 91 – 95%                      |

108 SpO<sub>2</sub> = oxygen saturation

109

110 The STOP-ROP trial found no differences in progression of retinopathy of prematurity, but  
 111 targeting a higher SpO<sub>2</sub> did lead to a higher incidence of respiratory morbidity (pneumonia or  
 112 exacerbations of chronic lung disease).(13) However, this study was not designed, nor  
 113 powered for respiratory outcomes. The BOOST trial found no differences between the two  
 114 groups on growth or neurodevelopment at 12 months corrected age, but infants in the higher

1  
2  
3 115 SpO<sub>2</sub> range had an increased length of oxygen therapy and required home oxygen more  
4  
5 116 often.(14) The meta-analysis of the NeOProM Collaboration showed that targeting a higher  
6  
7 117 SpO<sub>2</sub> range decreased the incidence of death and necrotizing enterocolitis, but the incidence  
8  
9 118 of retinopathy of prematurity requiring treatment was higher in the higher saturation group.  
10  
11 119 The use of supplemental oxygen at 36 weeks PMA was higher in the group with a higher  
12  
13 120 SpO<sub>2</sub> target range, due to the study protocol.(16) The incidence of blindness, severe hearing  
14  
15 121 loss and cerebral palsy was similar across the groups.(15)  
16  
17 122 Based on the outcomes of these studies, the American Academy of Pediatrics concluded that  
18  
19 123 the optimal SpO<sub>2</sub> range for extremely low birth weight infants remains unknown, but that an  
20  
21 124 SpO<sub>2</sub> range of 90 to 95% may be safer than 85 to 89%.(17)  
22  
23  
24  
25  
26 125  
27  
28 126 It is important to acknowledge that there are several reasons why the results of these oxygen  
29  
30 127 targeting studies before 36 weeks PMA may not be extrapolated to infants with established  
31  
32 128 BPD who have reached near term age. Firstly, the lungs have reached a new stage of  
33  
34 129 development as alveolar growth starts from approximately 36 weeks of gestation.(18) In  
35  
36 130 addition, there is a transition from lung development to lung growth in infancy and  
37  
38 131 childhood, as lung volume will increase about 23 times between birth and adulthood in  
39  
40 132 healthy subjects.(18) Secondly, it has been suggested that vulnerability to oxidative stress is  
41  
42 133 less pronounced at 36 weeks PMA compared to the first weeks of life as antioxidant systems  
43  
44 134 have matured. Thirdly, also the pulmonary vascular system undergoes important  
45  
46 135 differentiation during the different stages of lung development.(19) The optimal SpO<sub>2</sub> range  
47  
48 136 to prevent pulmonary vascular disease may be different from the range to improve pulmonary  
49  
50 137 vascular disease. Therefore, infants with established BPD after 36 weeks PMA may require  
51  
52 138 another approach to oxygen treatment than infants with developing BPD before 36 weeks  
53  
54 139 PMA.  
55  
56  
57  
58  
59  
60

1  
2  
3 140  
4

5 141 In summary, there is a lack of evidence on the optimal SpO<sub>2</sub> levels in infants with established  
6  
7 142 BPD from 36 weeks PMA onwards to optimize respiratory health. Therefore, the aim of this  
8  
9  
10 143 study is to compare a higher SpO<sub>2</sub> (i.e. 95% lower limit) to a lower SpO<sub>2</sub> (i.e. 90% lower  
11  
12 144 limit) in infants with moderate or severe BPD from 36 weeks PMA and onwards. Our  
13  
14  
15 145 hypothesis is that a higher SpO<sub>2</sub> target in infants with established moderate or severe BPD,  
16  
17 146 improves weight gain and lung growth.  
18

19 147  
20

## 21 148 **OBJECTIVES**

22  
23  
24 149 The primary objective is to investigate whether a higher SpO<sub>2</sub> (i.e. 95% lower limit) leads to a  
25  
26 150 higher weight at 6 months corrected age, as a surrogate for lung growth. Secondary objectives  
27  
28 151 are to determine if a higher SpO<sub>2</sub> translates into higher weight and height at 12 months  
29  
30  
31 152 corrected age, less healthcare consumption, less infant stress, better quality of life for parents  
32  
33 153 or caregivers and more favourable cost-effectiveness.  
34

35 154  
36

## 37 155 **METHODS AND ANALYSIS**

### 38 156 **Study design and setting**

39  
40  
41  
42 157 The SOS BPD study is an open, randomised controlled trial and will be conducted in the  
43  
44 158 Netherlands in approximately (but not limited to) 30 hospitals. In the Netherlands, the care  
45  
46 159 for extremely preterm born infants is concentrated in 9 hospital clusters. Each cluster consists  
47  
48  
49 160 of one or two level 3 Neonatal Intensive Care Units (NICU) and several post-intensive  
50  
51 161 care/high care (post-IC/HC) units in surrounding level 2 centres. The participating hospitals  
52  
53 162 include 10 NICU centres and 20 post-IC/HC units. A list of recruiting sites is provided in  
54  
55  
56 163 online supplemental file 1. The SOS BPD study is conducted within the Neonatology  
57  
58 164 Network Netherlands (N3) organization.(20)  
59  
60

1  
2  
3 165 The protocol for this trial is reported based on the Standard Protocol Items:  
4  
5 166 Recommendations for Interventional Trials (SPIRIT) 2013 Checklist(21) (online  
6  
7 167 supplemental file 2: SPIRIT Checklist).  
8  
9

10 168

11  
12 169 **Study population**

13  
14 170 Infants with moderate or severe BPD, born before 32 weeks of gestation, who still receive  
15  
16 171 respiratory support at 36 weeks PMA are eligible for inclusion. BPD is defined as the use of  
17  
18 172 supplemental oxygen (i.e. >21% oxygen) for  $\geq 28$  days since birth.(22) Depending on the  
19  
20 173 level of respiratory support at 36 weeks PMA, BPD severity is classified as mild, moderate or  
21  
22 174 severe (Table 2). An oxygen reduction test will be used to assess severity if indicated.(23)  
23  
24  
25

26 175

27  
28 176 **Table 2. BPD diagnostic criteria for infants born <32 weeks PMA. Severity is classified**  
29  
30 177 **at 36 weeks PMA.(22)**  
31  
32

| Definition of BPD                                     | Severity classification                                                     |                                    |                                                                                                   |
|-------------------------------------------------------|-----------------------------------------------------------------------------|------------------------------------|---------------------------------------------------------------------------------------------------|
|                                                       | Mild                                                                        | Moderate                           | Severe                                                                                            |
| Treatment with supplemental oxygen for $\geq 28$ days | Breathing room air or nasal cannula with $\leq 1$ L flow, $FiO_2 \leq 21\%$ | Supplemental oxygen >21%, but <30% | Supplemental oxygen $\geq 30\%$ , or (non-)invasive positive pressure ventilation, including HFNC |

33  
34  
35  
36  
37  
38  
39  
40  
41  
42  
43  
44  
45  
46  
47  
48  
49  
50  
51 178 BPD = bronchopulmonary dysplasia,  $FiO_2$  = fraction of inspired oxygen; HFNC = High Flow

52  
53 179 Nasal Cannula; L = liter; PMA = postmenstrual age  
54  
55

56 180  
57  
58  
59  
60

1  
2  
3 181 Written informed consent will be obtained from parents or legal guardians by the local PI of  
4  
5 182 the hospital where the participant is admitted between 36 to 38 weeks PMA (online  
6  
7 183 supplemental file 3: English version of the patient information and informed consent  
8  
9 184 document). Exclusion criteria are significant congenital heart disease (not being patent ductus  
10  
11 185 arteriosus, small atrial septal defect, ventricular septal defect), pulmonary hypertension with  
12  
13 186 medical treatment, retinopathy of prematurity for which the ophthalmologist recommends a  
14  
15 187 patient specific SpO<sub>2</sub> target, severe acquired upper airway abnormalities, such as subglottic  
16  
17 188 stenosis and interstitial lung diseases.  
18  
19  
20  
21  
22

189

### 190 **Randomisation**

25  
26 191 Participants will be randomised 1:1 to one of two parallel treatment arms: weaning of  
27  
28 192 supplemental oxygen and respiratory support based on an SpO<sub>2</sub> lower limit of 95% or  
29  
30 193 weaning based on a lower limit of 90%.

31  
32  
33 194 For the randomisation procedure, an electronic data capture system that uses a computer-  
34  
35 195 generated randomisation list (Castor EDC) will be used.(24) We will use block  
36  
37 196 randomisation, with a variable block size (4 – 8). Allocation will be stratified by NICU centre  
38  
39 197 (10 centres) and BPD severity (moderate or severe). In case of multiple birth, the firstborn  
40  
41 198 infant will be randomised according to standard procedures. Siblings will be manually  
42  
43 199 assigned to the same treatment arm as the firstborn infant.

44  
45  
46 200 Enrolment, registration and electronic randomisation in Castor EDC will be carried out by the  
47  
48 201 local PI of the hospital where the participant is included.

49  
50  
51 202 This is a non-blinded study, since it is not feasible to blind treating physicians and parents for  
52  
53 203 SpO<sub>2</sub> values as measured with pulse oximetry in the hospital or at home.

204

### 205 **Study procedures**

1  
2  
3 206 After randomisation, participants are assigned to one of the 2 treatment arms. A lower limit  
4  
5 207 of 95% was chosen for the first group, as the median SpO<sub>2</sub> in preterm infants without BPD is  
6  
7 208 > 95% (25) and SpO<sub>2</sub> >94% reduces the incidence of pulmonary hypertension.(9) Also, with  
9  
10 209 a lower limit of 95% there is a clear contrast between the 2 groups. A lower limit of 90% was  
11  
12 210 chosen for the second group, since this lower limit is advised in the BPD guideline of the  
13  
14 211 European Respiratory Society and SpO<sub>2</sub> values < 90% have been associated with adverse  
16  
17 212 outcomes.(11, 17)  
18  
19 213 During hospitalization, respiratory support and oxygen supplementation will be adjusted  
20  
21 214 based on the assigned lower limit of SpO<sub>2</sub>, as part of daily clinical care. Twice a week, SpO<sub>2</sub>  
22  
23 215 data will be logged from pulse oximeters. Logging frequency differs from 0.25 to 1 Hertz,  
24  
25 216 depending on the type of pulse oximeter that was used in the respective hospitals.  
26  
27 217 Pseudonymised SpO<sub>2</sub> data will be sent to the research team using encrypted file transfer.  
28  
29 218 Based on the recorded SpO<sub>2</sub> data and group assignment, the medical team will receive advice  
30  
31 219 to actively wean or increase supplemental oxygen.  
32  
33 220 In case participants are discharged on home oxygen, SpO<sub>2</sub> data will be logged from a pulse  
34  
35 221 oximeter at home by the parents once weekly and will be sent to the research team through  
36  
37 222 encrypted file transfer. Feedback and advice to adjust supplemental oxygen will be given to  
38  
39 223 the parents and treating physician.  
40  
41 224 SpO<sub>2</sub> profiles will be obtained until one week after discontinuation of respiratory support.  
42  
43 225 If an infant is readmitted to hospital while still on supplemental oxygen, the assigned SpO<sub>2</sub>  
44  
45 226 lower limit will be kept. If infants are readmitted after they were weaned from supplemental  
46  
47 227 oxygen for at least two weeks, the lower SpO<sub>2</sub> limit will be set according to the local hospital  
48  
49 228 policy.  
50  
51 229 In order to follow routine clinical care as much as possible, physicians will wean  
52  
53 230 supplemental oxygen according to their local hospital protocol. If no such protocol is  
54  
55  
56  
57  
58  
59  
60

231 available, a study specific standard operating procedure will give recommendations on  
232 weaning supplemental oxygen.

233 In order to improve feasibility and generalizability, the use of diuretics, inhaled or oral  
234 corticosteroids, other medications, fluid restriction and feedings will be according to national  
235 guidelines or local policies. Data on these parameters will be collected during the study.

236

### 237 **Interpretation of SpO<sub>2</sub> profiles**

238 If the time spent below the assigned lower limit of SpO<sub>2</sub> is  $\geq 10\%$  of the recorded time  
239 (equivalent to  $< 90\%$  of the time spent above the lower limit), the treating team is advised to  
240 increase supplemental oxygen and/or respiratory support. When the SpO<sub>2</sub> is below the  
241 assigned lower limit for  $\leq 10\%$  of the time (equivalent to  $> 90\%$  of the time spent above the  
242 lower limit), the treating team is advised to wean supplemental oxygen and/or respiratory  
243 support.

244 The British Thoracic Society Guideline for home oxygen in children suggests that the lower  
245 limit target SpO<sub>2</sub> should be met for at least 95% of a stable recording period.<sup>(9)</sup> However,  
246 this does not take into account that a 24-hour SpO<sub>2</sub> profile is prone to artefacts due to periods  
247 of feeding, physical activity and external manipulation of the saturation probe. Furthermore,  
248 Terrill et al. studied normative oximetry data in extreme preterm infants at term equivalent  
249 age and reported mean saturations of 96.1% (95.4–96.8%) with 7.56% (5.1–10.0%) of the  
250 measuring time spent below an SpO<sub>2</sub> of 90%.<sup>(26, 27)</sup> Therefore, we chose this limit of 10%  
251 below the assigned SpO<sub>2</sub> to adjust oxygen supplementation.

252 Temporary deviation of the protocol is possible if this is deemed necessary for medical  
253 reasons according to the treating physician. Reasons for these protocol deviations have to be  
254 reported to the research team.

255

## 256 **Follow-up**

257 The study duration will be 12 months, with two follow-up visits at 6 and 12 months corrected  
258 age. These follow-up visits follow the national neonatal follow-up program; no extra study  
259 visits are required.(28) Data that will be obtained during study visits are weight, height, head  
260 circumference, caloric intake, use of medication, respiratory complaints, number of health  
261 care visits and hospitalizations.

262 In a subgroup of patients, additional investigations including chest CT scan (assessed with  
263 PRAGMA-BPD scores),(29) multiple breath washout tests (Lung Clearance Index),  
264 polysomnography (baseline SpO<sub>2</sub>, oxygen desaturation index, apnea-hypopnea index) and/or  
265 an echocardiogram will be performed, as part of routine care in some hospitals during follow-  
266 up at six months corrected age.

267

268 Parents will receive monthly online questionnaires that address the health situation of their  
269 child in the past month and also contain questions used for cost-effectiveness analyses. In  
270 addition, parents will be asked to fill in the Dutch version of the Care-Related Quality of Life  
271 instrument (CarerQoL-7D). The CarerQoL is designed to measure and value the impact of  
272 providing informal care on caregivers.(30)

273 At the start of the study and at the corrected age of 6 and 12 months, parents will also be  
274 asked to fill in the Dutch version of the Infant Behavior Questionnaire – Revised (IBQ-R)  
275 Very Short Form.(31) The IBQ-R is designed to measure the temperament of infants between  
276 3 and 12 months.

277

## 278 **Outcomes**

279 The primary outcome of the study is weight standard deviation score (SDS) at 6 months  
280 corrected age as a surrogate for lung growth. Increased weight and weight gain during



1  
2  
3 281 infancy are associated with better lung function and structure.(32, 33) Appropriate growth is  
4  
5 282 also an important measure of general well-being in infancy, whilst growth delay is associated  
6  
7 283 with an increased risk of future respiratory and cardiovascular disease and impaired  
8  
9  
10 284 intellectual outcomes.(34, 35) Growth failure is very common in infants with BPD. The exact  
11  
12 285 underlying mechanisms are unknown, but increased respiratory demands and periods of  
13  
14 286 intermittent hypoxia probably play an important role.(27) Secondary outcomes are weight  
15  
16 287 SDS at 12 months corrected age, height and head circumference SDS at 6 and 12 months  
17  
18 288 corrected age, rate of re-hospitalisations, respiratory symptoms (including wheezing,  
19  
20 289 dyspnea, exercise induced symptoms), unscheduled health care visits, infant temperament  
21  
22  
23 290 (IBQ-r), quality of life of caregivers (CarerQoL) and cost-effectiveness.  
24  
25  
26 291 In a subgroup of infants, additional secondary outcomes are lung function (lung clearance  
27  
28 292 index), lung structure as assessed with chest CT scan, and pulmonary hypertension and/or  
29  
30 293 right ventricular systolic function as assessed with echocardiography at the corrected age of 6  
31  
32  
33 294 months. These examinations are part of the standard of care protocol in some of the  
34  
35 295 outpatient follow-up programs in the Netherlands.  
36  
37  
38  
39

#### 40 297 **Data collection and management**

41  
42 298 For data management Castor EDC will be used: a password protected, electronic database.  
43  
44 299 Baseline characteristics including gestational age, birth weight, gender, pregnancy  
45  
46 300 complications such as pre-eclampsia, past illnesses and retinopathy of prematurity will be  
47  
48 301 recorded in the database at inclusion by the local research team. SpO<sub>2</sub> data will be entered  
49  
50 302 into the database by the central research team. Data from follow-up visits will be entered by  
51  
52 303 the research team of the responsible NICU, as outpatient follow-up takes place in those  
53  
54 304 centres. In case of missing data, every attempt will be undertaken to retrieve the data by  
55  
56 305 contacting the respective hospitals.  
57  
58  
59  
60

1  
2  
3 306 Collected data will be pseudonymised and coded with a unique number, complying with the  
4  
5 307 European General Data Protection Regulation. The key to link participants with their data  
6  
7 308 will only be accessible to the local PI of the centre of inclusion and PI of the associated  
8  
9 309 NICU. Data will be stored securely and will be saved for 15 years according to national  
10  
11 310 legislation. Only central study investigators will have access to all collected data.  
12  
13  
14

15 311

### 17 312 **Patient and public involvement**

18  
19 313 Parents of children with BPD and several patient associations (Lung Foundation Netherlands,  
20  
21 314 European Lung Foundation and the Neonatal Parents Organization (Care4Neo)) were  
22  
23 315 involved in the development of the trial. In addition, parents of preterm born infants are part  
24  
25 316 of the Advisory Board of the trial. They provide their experience in improving patient  
26  
27 317 information material, publications and presentations for layman and will help with  
28  
29 318 implementation after finalization of the study.  
30  
31  
32

33 319

### 35 320 **Sample size estimation**

36  
37 321 A simulation study with four scenarios was performed to estimate the sample size needed  
38  
39 322 with weight SDS at 6 months corrected age as primary outcome. We assumed a mixed effects  
40  
41 323 model with a random intercept to account for the correlation between the patients from the  
42  
43 324 same hospital. We assumed 10 clusters (10 NICU centres with post IC/HC departments in the  
44  
45 325 surrounding regional hospitals) with each cluster having 16 ( $\pm 3$ ) or 18 ( $\pm 3$ ) patients. The  
46  
47 326 mean weight at 6 months for the group with a lower saturation limit of 90% was assumed  
48  
49 327 -1.15 SD (data from BPD cohort Erasmus MC, Rotterdam, the Netherlands, data on file). The  
50  
51 328 mean weight at 6 months for the group with a lower saturation limit of 95% was assumed  
52  
53 329 -0.65 SD, since a 0.5 SDS higher weight was considered clinically relevant. The variation in  
54  
55 330 weight due to differences between individuals was assumed 1.18 SD, while the variation in  
56  
57  
58  
59  
60

1  
2  
3 331 weight due to differences between hospitals was assumed 0.10 and 0.20 SD. The scenario  
4  
5 332 with the highest power (0.83) and greatest variation of weight between the various hospital  
6  
7 333 clusters (0.20 SD) was chosen. This scenario leads to a sample size of 180 patients.  
8  
9 334 Accounting for a drop-out rate of 10%, we aim to include 198 infants.  
10  
11  
12  
13

335

### 336 **Statistical analysis**

17 337 Analyses will be performed on an intention-to-treat (ITT) basis. The ITT population will  
18  
19 338 include all randomised infants, regardless of protocol deviations.  
20

21 339 Comparison between the two groups for the primary endpoint will be made using a mixed  
22  
23 340 effect model with a random intercept to account for the correlation between patients from the  
24  
25 341 same hospital cluster. All secondary parameters will be assessed by linear mixed effect  
26  
27 342 models for continuous outcomes or logistic mixed effect models for binary outcomes. BPD  
28  
29 343 severity and weight at inclusion are considered relevant variables for the outcome weight  
30  
31 344 SDS at 6 months. For the secondary analysis, these variables will be included in the mixed  
32  
33 345 model analysis as fixed effects. Significance levels will be 0.05.  
34  
35  
36

37 346 Missing values in the baseline covariates, if >10%, will be assumed to be missing at random  
38  
39 347 and multiple imputations will be used. We do expect less than 10% missing data for the  
40  
41 348 primary endpoint, weight SDS.  
42  
43

44 349 All analyses will be completed with the statistical software package R ([www.rproject.org](http://www.rproject.org)),  
45  
46 350 and SPSS/PC Statistics 21.0 (SPSS Inc., Chicago, IL, USA).  
47  
48

351

### 51 352 **Cost-effectiveness analysis**

52 353 A trial-based economic evaluation will be used as a cost-effectiveness analysis performed  
53  
54 354 from a societal perspective as well as from a healthcare perspective. The initial time horizon  
55  
56 355 is one year. Costs will be calculated based on patient-level data on resource use inside and  
57  
58  
59  
60

1  
2  
3 356 outside the healthcare sector during the first year of life of the infant. If an oxygen weaning  
4  
5 357 strategy leads to better health outcomes at higher costs, incremental cost-effectiveness ratios  
6  
7  
8 358 will be calculated. Depending on which treatment is more effective, these ratios will express  
9  
10 359 the additional costs per unit of health gain or the savings per unit of health forgone.  
11  
12 360 Although it is very plausible that health effects and differences in costs persist or occur later in  
13  
14 361 life, currently available data and literature do not allow a meaningful extrapolation after the  
15  
16 362 study period. Nevertheless, the children will be followed until the age of 8 year, outside of the  
17  
18 363 scope of this initial study, according to national follow-up guidelines for preterm born children.  
19  
20  
21 364 This will make it possible to track costs and effects in the longer term.  
22  
23  
24 365

## 26 366 **ETHICS AND DISSEMINATION**

### 28 367 **Ethical consideration**

30 368 Ethical approval for the trial has been obtained from the Medical Ethics Review Committee  
31  
32  
33 369 of the Erasmus University Medical Center, Rotterdam, the Netherlands (MEC-2018-1515).  
34  
35 370 Local approval for conducting the trial in the participating hospitals has been, or will be  
36  
37 371 obtained from the local institutional review boards. Written informed consent will be  
38  
39 372 obtained from the parents or legal guardians of all study participants, adhering the Good  
40  
41 373 Clinical Practice guideline.(36)  
42  
43  
44 374 Protocol modifications will be communicated to all relevant parties.  
45  
46  
47 375

### 49 376 **Safety reporting and auditing**

51 377 All serious adverse events (SAE) will be reported to the approving ethics committee in  
52  
53 378 accordance with national guidelines. SAEs will be collected and recorded from informed  
54  
55 379 consent signature to two weeks after stopping supplemental oxygen. After this period until  
56  
57  
58 380 the last follow-up visit at 12 months corrected age, only intensive care admissions for  
59  
60

1  
2  
3 381 complicated respiratory tract infections and death will be considered SAEs and will be  
4  
5 382 reported as such.

6  
7  
8 383

9  
10 384 All participating sites will be audited by an independent study monitor. For frequency and  
11  
12 385 procedures, see online supplemental file 4.

13  
14 386

### 17 387 **Data and Safety Monitoring Board**

18  
19 388 A Data and Safety Monitoring Board (DSMB) is installed. Although this study does not add  
20  
21 389 extra risks to the safety of the patients, the DSMB is installed because of the vulnerability of  
22  
23 390 the population and complicated logistics of a multicentre trial. The DSMB will monitor the  
24  
25 391 safety, validity and credibility of the trial in order to protect the patients, but not futility. In  
26  
27 392 principle, the trial will not be stopped early for a beneficial effect on the primary outcome.  
28  
29 393 Safety analyses will be performed when approximately 25%, 50% and 75% of patients have  
30  
31 394 reached the end of the follow-up (12 months corrected age). The safety data analysis will  
32  
33 395 include retinopathy of prematurity and serious adverse events. The DSMB is independent  
34  
35 396 from the sponsor; the committee members have declared no competing interests.

36  
37  
38 397

### 42 398 **Dissemination**

39  
40  
41  
42  
43  
44 399 Results of the trial will be published in open-access journals. After ending of the trial and  
45  
46 400 publication of results, the data collection of this trial will be available for sharing under  
47  
48 401 conditions, through a secured, online portal (DANS).(37)

49  
50 402

### 53 403 **Trial status**

54  
55 404 Patient inclusion was started in January 2020, but was temporarily paused due to regulations  
56  
57 405 during the Corona virus pandemic (COVID-19). Inclusion restarted in August 2020.

1  
2  
3 **406 Statements**  
4

5 **407 Contributors:** MP, AvK, WO, DN, EV, PD, AB, AK, IR and SB constitute the trial steering  
6  
7  
8 **408** committee. MP, AvK, WO, DN, EV, PD, AB, AK and IR designed the trial and will provide  
9  
10 **409** clinical expertise in the conduct of the trial; MP is the Chief Investigator and has overall  
11  
12 **410** leadership of the trial; DN is partly responsible for logistical coordination of the trial; SB is  
13  
14 **411** responsible for overall coordination of the trial and management of the clinical data. AH and  
15  
16 **412** AS constitute the Advisory Board and provide clinical expertise in the conduct of the trial.  
17  
18 **413** LG is responsible for cost-effectiveness analyses. EA is the trial statistician. The SOS BPD  
19  
20 **414** study group consists of all local investigators in the participating hospitals who are  
21  
22 **415** responsible for patient recruitment and data collection.  
23  
24

25  
26 **416** SB wrote the first draft version of the manuscript; all authors, including the study group,  
27  
28 **417** reviewed draft versions and approved the final manuscript as submitted and agreed to be  
29  
30 **418** accountable for all aspects of the work.  
31  
32

33 **419 Collaborators:** the SOS BPD study group: M.G.A. Baartmans, G.J. Blok, W.P. de Boode,  
34  
35 **420** H.D. Buitter, C.E. Counsilman, C.A. Dalen Meurs, A.C.M. Dassel, A.M. de Grauw, M.E.N.  
36  
37 **421** van den Heuvel, J.L.A.M. van Hillegersberg, J.C.R. van Hoften, J.H.L. van Hoorn, C.H. ten  
38  
39 **422** Hove, M. de Jong, A. Kamerbeek, A.A.M.W. van Kempen, J.S. von Lindern, L.H. van der  
40  
41 **423** Meer, R.M.J. Moonen, E.E.M. Mulder, H.J. Niemarkt, L.G.M. van Rooij, M.A.G. van  
42  
43 **424** Scherpenzeel-de Vries, I.A.M. Schiering, R.N.G.B. Tan, E. Villamor.  
44  
45

46  
47 **425 Funding:** This work was supported by the Lung Foundation Netherlands under grant number  
48  
49 **426** 4.1.17.162 and by Netherlands Organisation for Health Research and Development  
50  
51 **427** (ZonMW) – Efficiency Studies Program under grant number 843002827. The study funders  
52  
53 **428** were not involved in the design of the trial, and are not involved in data collection, analysis  
54  
55 **429** and interpretation of data.  
56  
57

58 **430 Competing interests:** none declared  
59  
60

1  
2  
3 431 **Patient consent for publication:** Not required  
4

5 432 **Provenance and peer review:** Not commissioned; externally reviewed for funding and  
6  
7  
8 433 ethical approval prior to submission.  
9

10 434

11  
12 435 **REFERENCES**  
13

14 436 1. Thebaud B, Goss KN, Laughon M, Whitsett JA, Abman SH, Steinhorn RH, et al.

15  
16  
17 437 Bronchopulmonary dysplasia. *Nat Rev Dis Primers*. 2019;5(1):78.  
18

19 438 2. Bhandari A, Bhandari V. Pathogenesis, pathology and pathophysiology of pulmonary  
20

21 439 sequelae of bronchopulmonary dysplasia in premature infants. *Front Biosci*. 2003;8:e370-80.  
22

23  
24 440 3. Stoll BJ, Hansen NI, Bell EF, Walsh MC, Carlo WA, Shankaran S, et al. Trends in Care  
25

26 441 Practices, Morbidity, and Mortality of Extremely Preterm Neonates, 1993-2012. *Jama*.  
27

28 442 2015;314(10):1039-51.  
29

30 443 4. Simpson SJ, Turkovic L, Wilson AC, Verheggen M, Logie KM, Pillow JJ, et al. Lung  
31

32 444 function trajectories throughout childhood in survivors of very preterm birth: a longitudinal  
33

34 445 cohort study. *Lancet Child Adolesc Health*. 2018;2(5):350-9.  
35

36 446 5. Gough A, Linden M, Spence D, Patterson CC, Halliday HL, McGarvey LP. Impaired lung  
37

38 447 function and health status in adult survivors of bronchopulmonary dysplasia. *Eur Respir J*.  
39

40 448 2014;43(3):808-16.  
41

42  
43  
44 449 6. Smith VC, Zupancic JA, McCormick MC, Croen LA, Greene J, Escobar GJ, et al.  
45

46 450 Rehospitalization in the first year of life among infants with bronchopulmonary dysplasia. *J*  
47

48 451 *Pediatr*. 2004;144(6):799-803.  
49

50 452 7. Pramana IA, Latzin P, Schlapbach LJ, Hafen G, Kuehni CE, Nelle M, et al. Respiratory  
51

52 453 symptoms in preterm infants: burden of disease in the first year of life. *Eur J Med Res*.  
53

54 454 2011;16(5):223-30.  
55  
56  
57  
58  
59  
60



- 1  
2  
3 455 8. McGrath-Morrow SA, Ryan T, Riekert K, Lefton-Greif MA, Eakin M, Collaco JM. The  
4  
5 456 impact of bronchopulmonary dysplasia on caregiver health related quality of life during the  
6  
7 457 first 2 years of life. *Pediatr Pulmonol*. 2013;48(6):579-86.
- 9  
10 458 9. Balfour-Lynn IM, Field DJ, Gringras P, Hicks B, Jardine E, Jones RC, et al. BTS  
11  
12 459 guidelines for home oxygen in children. *Thorax*. 2009;64 Suppl 2:ii1-26.
- 14 460 10. Martin DS, Grocott MP. Oxygen therapy in critical illness: precise control of arterial  
15  
16 461 oxygenation and permissive hypoxemia. *Crit Care Med*. 2013;41(2):423-32.
- 18 462 11. Duijts L, van Meel ER, Moschino L, Baraldi E, Barnhoorn M, Bramer WM, et al.  
19  
20 463 European Respiratory Society guideline on long term management of children with  
21  
22 464 bronchopulmonary dysplasia. *Eur Respir J*. 2019.
- 24 465 12. Hayes D, Jr., Wilson KC, Krivchenia K, Hawkins SMM, Balfour-Lynn IM, Gozal D, et  
25  
26 466 al. Home Oxygen Therapy for Children. An Official American Thoracic Society Clinical  
27  
28 467 Practice Guideline. *Am J Respir Crit Care Med*. 2019;199(3):e5-e23.
- 30 468 13. Supplemental Therapeutic Oxygen for Prethreshold Retinopathy Of Prematurity (STOP-  
31  
32 469 ROP), a randomized, controlled trial. I: primary outcomes. *Pediatrics*. 2000;105(2):295-310.
- 34 470 14. Askie LM, Henderson-Smart DJ, Irwig L, Simpson JM. Oxygen-Saturation Targets and  
35  
36 471 Outcomes in Extremely Preterm Infants. *New England Journal of Medicine*.  
37  
38 472 2003;349(10):959-67.
- 40 473 15. Askie LM, Darlow BA, Davis PG, Finer N, Stenson B, Vento M, et al. Effects of  
41  
42 474 targeting lower versus higher arterial oxygen saturations on death or disability in preterm  
43  
44 475 infants. *Cochrane Database Syst Rev*. 2017;4:CD011190.
- 46 476 16. Saugstad OD, Aune D. Optimal oxygenation of extremely low birth weight infants: a  
47  
48 477 meta-analysis and systematic review of the oxygen saturation target studies. *Neonatology*.  
49  
50 478 2014;105(1):55-63.
- 51  
52  
53  
54  
55  
56  
57  
58  
59  
60



- 1  
2  
3 479 17. Cummings JJ, Polin RA, Committee On F, Newborn. Oxygen Targeting in Extremely  
4  
5 480 Low Birth Weight Infants. *Pediatrics*. 2016;138(2).  
6  
7 481 18. Schittny JC, Burri PH, editors. *Development and growth of the lung*. 2007.  
8  
9 482 19. de Wijs-Meijler DP, Duncker DJ, Tibboel D, Schermuly RT, Weissmann N, Merkus D, et  
10  
11 483 al. Oxidative injury of the pulmonary circulation in the perinatal period: Short- and long-term  
12  
13 484 consequences for the human cardiopulmonary system. *Pulm Circ*. 2017;7(1):55-66.  
14  
15 485 20. Neonatology Network Netherlands (N3). Neonatology Network Netherlands [Available  
16  
17 486 from: <http://www.neonatology.eu/>.  
18  
19 487 21. Chan AW, Tetzlaff JM, Gotzsche PC, Altman DG, Mann H, Berlin JA, et al. SPIRIT  
20  
21 488 2013 explanation and elaboration: guidance for protocols of clinical trials. *BMJ*.  
22  
23 489 2013;346:e7586.  
24  
25 490 22. Dutch Association of Pediatrics - Bronchopulmonary Dysplasia Working Group.  
26  
27 491 Guideline Bronchopulmonary Dysplasia. December 2013.  
28  
29 492 23. Walsh MC, Wilson-Costello D, Zadell A, Newman N, Fanaroff A. Safety, reliability, and  
30  
31 493 validity of a physiologic definition of bronchopulmonary dysplasia. *J Perinatol*.  
32  
33 494 2003;23(6):451-6.  
34  
35 495 24. Castor EDC. Castor Electronic Data Capture. 2019(August 28, 2019).  
36  
37 496 25. Rath C, Kluckow M. Oxygen saturation profile of term equivalent extreme preterm  
38  
39 497 infants at discharge - comparison with healthy term counterparts. *Acta Paediatr*.  
40  
41 498 2016;105(3):e94-8.  
42  
43 499 26. Terrill PI, Dakin C, Edwards BA, Wilson SJ, MacLean JE. A graphical method for  
44  
45 500 comparing nocturnal oxygen saturation profiles in individuals and populations: Application to  
46  
47 501 healthy infants and preterm neonates. *Pediatr Pulmonol*. 2018;53(5):645-55.  
48  
49 502 27. Everitt LH, Awoseyila A, Bhatt JM, Johnson MJ, Vollmer B, Evans HJ. Weaning oxygen  
50  
51 503 in infants with bronchopulmonary dysplasia. *Paediatr Respir Rev*. 2020.  
52  
53  
54  
55  
56  
57  
58  
59  
60

- 1  
2  
3 504 28. Dutch Association of Pediatrics - National Neonatal Follow-up Work Group.  
4  
5 505 Recommendation National Neonatal Follow-up - NICU follow-up. January 2015.  
6  
7 506 29. van Mastrigt E, Logie K, Ciet P, Reiss IK, Duijts L, Pijnenburg MW, et al. Lung CT  
8  
9 507 imaging in patients with bronchopulmonary dysplasia: A systematic review. *Pediatr*  
10  
11 508 *Pulmonol.* 2016;51(9):975-86.  
12  
13 509 30. Brouwer WB, van Exel NJ, van Gorp B, Redekop WK. The CarerQol instrument: a new  
14  
15 510 instrument to measure care-related quality of life of informal caregivers for use in economic  
16  
17 511 evaluations. *Qual Life Res.* 2006;15(6):1005-21.  
18  
19 512 31. Putnam SP, Helbig AL, Gartstein MA, Rothbart MK, Leerkes E. Development and  
20  
21 513 assessment of short and very short forms of the infant behavior questionnaire-revised. *J Pers*  
22  
23 514 *Assess.* 2014;96(4):445-58.  
24  
25 515 32. Sanchez-Solis M, Perez-Fernandez V, Bosch-Gimenez V, Quesada JJ, Garcia-Marcos L.  
26  
27 516 Lung function gain in preterm infants with and without bronchopulmonary dysplasia. *Pediatr*  
28  
29 517 *Pulmonol.* 2016;51(9):936-42.  
30  
31 518 33. van Mastrigt E, Kakar E, Ciet P, den Dekker HT, Joosten KF, Kalkman P, et al. Structural  
32  
33 519 and functional ventilatory impairment in infants with severe bronchopulmonary dysplasia.  
34  
35 520 *Pediatr Pulmonol.* 2017;52(8):1029-37.  
36  
37 521 34. DeBoer MD, Lima AA, Oria RB, Scharf RJ, Moore SR, Luna MA, et al. Early childhood  
38  
39 522 growth failure and the developmental origins of adult disease: do enteric infections and  
40  
41 523 malnutrition increase risk for the metabolic syndrome? *Nutr Rev.* 2012;70(11):642-53.  
42  
43 524 35. Wang LY, Luo HJ, Hsieh WS, Hsu CH, Hsu HC, Chen PS, et al. Severity of  
44  
45 525 bronchopulmonary dysplasia and increased risk of feeding desaturation and growth delay in  
46  
47 526 very low birth weight preterm infants. *Pediatr Pulmonol.* 2010;45(2):165-73.  
48  
49 527 36. Good Clinical Practice Network. Guideline for Good Clinical Practice ICH E6(R2) ICH  
50  
51 528 Consensus Guideline [Available from: <https://ichgcp.net/>.  
52  
53  
54  
55  
56  
57  
58  
59  
60

1  
2  
3  
4  
5  
6  
7  
8  
9  
10  
11  
12  
13  
14  
15  
16  
17  
18  
19  
20  
21  
22  
23  
24  
25  
26  
27  
28  
29  
30  
31  
32  
33  
34  
35  
36  
37  
38  
39  
40  
41  
42  
43  
44  
45  
46  
47  
48  
49  
50  
51  
52  
53  
54  
55  
56  
57  
58  
59  
60

529 37. Data Archiving and Networking Services (DANS). Dutch National Centre of Expertise  
530 and Repository for Research Data [Available from: <https://dans.knaw.nl/en>.  
531

For peer review only

### List of participating hospitals in the SOS BPD trial

All sites, participating in the SOS BPD trial, at the time of submission of the trial protocol:

| <b>Hospital</b>                                               | <b>Location</b> | <b>Local principle investigator</b> |
|---------------------------------------------------------------|-----------------|-------------------------------------|
| Albert Schweitzer Hospital                                    | Dordrecht       | M. de Jong                          |
| Amphia Hospital                                               | Breda           | A.R. Hulsmann                       |
| Amsterdam University Medical Centers – Locations AMC and VuMC | Amsterdam       | A.H. van Kaam, W. Onland            |
| Deventer Hospital                                             | Deventer        | A.C.M. Dassel                       |
| Elisabeth-Tweesteden Hospital                                 | Tilburg         | J.C.R. van Hoften                   |
| Erasmus MC – Sophia Children's Hospital                       | Rotterdam       | M.W.H. Pijnenburg, A.A. Kroon       |
| Flevo Hospital                                                | Almere          | C.E. Counsilman                     |
| Franciscus Gasthuis & Vlietland                               | Rotterdam       | A. Kamerbeek                        |
| Groene Hart Hospital                                          | Gouda           | J.S. von Lindern                    |
| Haga Hospital                                                 | Den Haag        | A.M. de Grauw                       |
| Isala Women and Children's Hospital                           | Zwolle          | E.E.M. Mulder                       |
| Leiden University Medical Center                              | Leiden          | R.N.G.B. Tan                        |
| Maasstad Hospital                                             | Rotterdam       | M.G.A. Baartmans                    |
| Maastricht University Medical Center                          | Maastricht      | E. Villamor                         |
| Martini Hospital                                              | Groningen       | H.D. Buiters                        |
| Maxima Medical Center                                         | Veldhoven       | H.J. Niemarkt                       |
| Meander Medical Center                                        | Amersfoort      | C.A. Dalen Meurs                    |
| Medical Center Leeuwarden                                     | Leeuwarden      | M.A.G. van Scherpenzeel - de Vries  |
| Medisch Spectrum Twente                                       | Enschede        | L.G.M. van Rooij                    |
| Noordwest Hospitalgroep                                       | Alkmaar         | G.J. Blok                           |
| OLVG                                                          | Amsterdam       | A.A.M.W. van Kempen                 |
| Radboud University Medical Center                             | Nijmegen        | W.P. de Boode                       |
| Reinier de Graaf Gasthuis                                     | Delft           | L.H. van der Meer                   |
| Rijnstate Hospital                                            | Arnhem          | C.H. ten Hove                       |
| Spaarne Gasthuis                                              | Haarlem         | I.A.M. Schiering                    |
| St. Antonius Hospital                                         | Nieuwegein      | J.L.A.M. van Hillegersberg          |
| University Medical Center Groningen                           | Groningen       | P.H. Dijk                           |
| Viecuri Medical Center                                        | Venlo           | J.H.L. van Hoorn                    |
| Zuyderland Medical Center                                     | Heerlen         | R.M.J. Moonen                       |

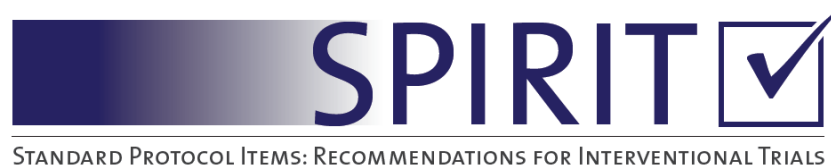

STANDARD PROTOCOL ITEMS: RECOMMENDATIONS FOR INTERVENTIONAL TRIALS

SPIRIT 2013 Checklist: Recommended items to address in a clinical trial protocol and related documents\*

| Section/item                      | Item No | Description                                                                                                                                                                                                                                                                              | Addressed on page number |
|-----------------------------------|---------|------------------------------------------------------------------------------------------------------------------------------------------------------------------------------------------------------------------------------------------------------------------------------------------|--------------------------|
| <b>Administrative information</b> |         |                                                                                                                                                                                                                                                                                          |                          |
| Title                             | 1       | Descriptive title identifying the study design, population, interventions, and, if applicable, trial acronym                                                                                                                                                                             | 1                        |
| Trial registration                | 2a      | Trial identifier and registry name. If not yet registered, name of intended registry                                                                                                                                                                                                     | 3                        |
|                                   | 2b      | All items from the World Health Organization Trial Registration Data Set                                                                                                                                                                                                                 | 3                        |
| Protocol version                  | 3       | Date and version identifier                                                                                                                                                                                                                                                              | 1 – 24                   |
| Funding                           | 4       | Sources and types of financial, material, and other support                                                                                                                                                                                                                              | 23, 24                   |
| Roles and responsibilities        | 5a      | Names, affiliations, and roles of protocol contributors                                                                                                                                                                                                                                  | 1, 23                    |
|                                   | 5b      | Name and contact information for the trial sponsor                                                                                                                                                                                                                                       | 1                        |
|                                   | 5c      | Role of study sponsor and funders, if any, in study design; collection, management, analysis, and interpretation of data; writing of the report; and the decision to submit the report for publication, including whether they will have ultimate authority over any of these activities | 23, 24                   |
|                                   | 5d      | Composition, roles, and responsibilities of the coordinating centre, steering committee, endpoint adjudication committee, data management team, and other individuals or groups overseeing the trial, if applicable (see Item 21a for data monitoring committee)                         | 23                       |

## 1 Introduction

|    |                |    |                                                                                                               |       |
|----|----------------|----|---------------------------------------------------------------------------------------------------------------|-------|
| 2  |                |    |                                                                                                               |       |
| 3  | Background and | 6a | Description of research question and justification for undertaking the trial, including summary of relevant   | 5 - 8 |
| 4  | rationale      |    | studies (published and unpublished) examining benefits and harms for each intervention                        |       |
| 5  |                |    |                                                                                                               |       |
| 6  |                | 6b | Explanation for choice of comparators                                                                         | 11    |
| 7  |                |    |                                                                                                               |       |
| 8  | Objectives     | 7  | Specific objectives or hypotheses                                                                             | 8     |
| 9  |                |    |                                                                                                               |       |
| 10 | Trial design   | 8  | Description of trial design including type of trial (eg, parallel group, crossover, factorial, single group), |       |
| 11 |                |    | allocation ratio, and framework (eg, superiority, equivalence, noninferiority, exploratory)                   | 8     |
| 12 |                |    |                                                                                                               |       |
| 13 |                |    |                                                                                                               |       |

## 14 Methods: Participants, interventions, and outcomes

|    |                      |     |                                                                                                               |         |
|----|----------------------|-----|---------------------------------------------------------------------------------------------------------------|---------|
| 15 |                      |     |                                                                                                               |         |
| 16 | Study setting        | 9   | Description of study settings (eg, community clinic, academic hospital) and list of countries where data will | 8       |
| 17 |                      |     | be collected. Reference to where list of study sites can be obtained                                          |         |
| 18 |                      |     |                                                                                                               |         |
| 19 | Eligibility criteria | 10  | Inclusion and exclusion criteria for participants. If applicable, eligibility criteria for study centres and  | 9 – 10  |
| 20 |                      |     | individuals who will perform the interventions (eg, surgeons, psychotherapists)                               |         |
| 21 |                      |     |                                                                                                               |         |
| 22 | Interventions        | 11a | Interventions for each group with sufficient detail to allow replication, including how and when they will be | 11 – 12 |
| 23 |                      |     | administered                                                                                                  |         |
| 24 |                      | 11b | Criteria for discontinuing or modifying allocated interventions for a given trial participant (eg, drug dose  | 11      |
| 25 |                      |     | change in response to harms, participant request, or improving/worsening disease)                             |         |
| 26 |                      | 11c | Strategies to improve adherence to intervention protocols, and any procedures for monitoring adherence        | 11 – 12 |
| 27 |                      |     | (eg, drug tablet return, laboratory tests)                                                                    |         |
| 28 |                      | 11d | Relevant concomitant care and interventions that are permitted or prohibited during the trial                 | 12      |
| 29 |                      |     |                                                                                                               |         |
| 30 | Outcomes             | 12  | Primary, secondary, and other outcomes, including the specific measurement variable (eg, systolic blood       | 13 – 14 |
| 31 |                      |     | pressure), analysis metric (eg, change from baseline, final value, time to event), method of aggregation (eg, |         |
| 32 |                      |     | median, proportion), and time point for each outcome. Explanation of the clinical relevance of chosen         |         |
| 33 |                      |     | efficacy and harm outcomes is strongly recommended                                                            |         |
| 34 |                      |     |                                                                                                               |         |
| 35 | Participant timeline | 13  | Time schedule of enrolment, interventions (including any run-ins and washouts), assessments, and visits for   | 11 – 13 |
| 36 |                      |     | participants. A schematic diagram is highly recommended (see Figure)                                          |         |
| 37 |                      |     |                                                                                                               |         |
| 38 |                      |     |                                                                                                               |         |
| 39 |                      |     |                                                                                                               |         |

|    |                                                                     |     |                                                                                                                                                                                                                                                                                                                                                                                                              |         |
|----|---------------------------------------------------------------------|-----|--------------------------------------------------------------------------------------------------------------------------------------------------------------------------------------------------------------------------------------------------------------------------------------------------------------------------------------------------------------------------------------------------------------|---------|
| 1  | Sample size                                                         | 14  | Estimated number of participants needed to achieve study objectives and how it was determined, including clinical and statistical assumptions supporting any sample size calculations                                                                                                                                                                                                                        | 15 – 16 |
| 2  |                                                                     |     |                                                                                                                                                                                                                                                                                                                                                                                                              |         |
| 3  |                                                                     |     |                                                                                                                                                                                                                                                                                                                                                                                                              |         |
| 4  | Recruitment                                                         | 15  | Strategies for achieving adequate participant enrolment to reach target sample size                                                                                                                                                                                                                                                                                                                          | 10      |
| 5  |                                                                     |     |                                                                                                                                                                                                                                                                                                                                                                                                              |         |
| 6  |                                                                     |     |                                                                                                                                                                                                                                                                                                                                                                                                              |         |
| 7  | <b>Methods: Assignment of interventions (for controlled trials)</b> |     |                                                                                                                                                                                                                                                                                                                                                                                                              |         |
| 8  | Allocation:                                                         |     |                                                                                                                                                                                                                                                                                                                                                                                                              |         |
| 9  |                                                                     |     |                                                                                                                                                                                                                                                                                                                                                                                                              |         |
| 10 | Sequence                                                            | 16a | Method of generating the allocation sequence (eg, computer-generated random numbers), and list of any factors for stratification. To reduce predictability of a random sequence, details of any planned restriction (eg, blocking) should be provided in a separate document that is unavailable to those who enrol participants or assign interventions                                                     | 10      |
| 11 | generation                                                          |     |                                                                                                                                                                                                                                                                                                                                                                                                              |         |
| 12 |                                                                     |     |                                                                                                                                                                                                                                                                                                                                                                                                              |         |
| 13 |                                                                     |     |                                                                                                                                                                                                                                                                                                                                                                                                              |         |
| 14 |                                                                     |     |                                                                                                                                                                                                                                                                                                                                                                                                              |         |
| 15 |                                                                     |     |                                                                                                                                                                                                                                                                                                                                                                                                              |         |
| 16 | Allocation                                                          | 16b | Mechanism of implementing the allocation sequence (eg, central telephone; sequentially numbered, opaque, sealed envelopes), describing any steps to conceal the sequence until interventions are assigned                                                                                                                                                                                                    | 10      |
| 17 | concealment                                                         |     |                                                                                                                                                                                                                                                                                                                                                                                                              |         |
| 18 | mechanism                                                           |     |                                                                                                                                                                                                                                                                                                                                                                                                              |         |
| 19 |                                                                     |     |                                                                                                                                                                                                                                                                                                                                                                                                              |         |
| 20 | Implementation                                                      | 16c | Who will generate the allocation sequence, who will enrol participants, and who will assign participants to interventions                                                                                                                                                                                                                                                                                    | 10      |
| 21 |                                                                     |     |                                                                                                                                                                                                                                                                                                                                                                                                              |         |
| 22 |                                                                     |     |                                                                                                                                                                                                                                                                                                                                                                                                              |         |
| 23 |                                                                     |     |                                                                                                                                                                                                                                                                                                                                                                                                              |         |
| 24 | Blinding (masking)                                                  | 17a | Who will be blinded after assignment to interventions (eg, trial participants, care providers, outcome assessors, data analysts), and how                                                                                                                                                                                                                                                                    | 10      |
| 25 |                                                                     |     |                                                                                                                                                                                                                                                                                                                                                                                                              |         |
| 26 |                                                                     |     |                                                                                                                                                                                                                                                                                                                                                                                                              |         |
| 27 |                                                                     | 17b | If blinded, circumstances under which unblinding is permissible, and procedure for revealing a participant's allocated intervention during the trial                                                                                                                                                                                                                                                         | N / A   |
| 28 |                                                                     |     |                                                                                                                                                                                                                                                                                                                                                                                                              |         |
| 29 |                                                                     |     |                                                                                                                                                                                                                                                                                                                                                                                                              |         |
| 30 |                                                                     |     |                                                                                                                                                                                                                                                                                                                                                                                                              |         |
| 31 | <b>Methods: Data collection, management, and analysis</b>           |     |                                                                                                                                                                                                                                                                                                                                                                                                              |         |
| 32 |                                                                     |     |                                                                                                                                                                                                                                                                                                                                                                                                              |         |
| 33 | Data collection                                                     | 18a | Plans for assessment and collection of outcome, baseline, and other trial data, including any related processes to promote data quality (eg, duplicate measurements, training of assessors) and a description of study instruments (eg, questionnaires, laboratory tests) along with their reliability and validity, if known. Reference to where data collection forms can be found, if not in the protocol | 13 – 15 |
| 34 | methods                                                             |     |                                                                                                                                                                                                                                                                                                                                                                                                              |         |
| 35 |                                                                     |     |                                                                                                                                                                                                                                                                                                                                                                                                              |         |
| 36 |                                                                     |     |                                                                                                                                                                                                                                                                                                                                                                                                              |         |
| 37 |                                                                     |     |                                                                                                                                                                                                                                                                                                                                                                                                              |         |
| 38 |                                                                     |     |                                                                                                                                                                                                                                                                                                                                                                                                              |         |
| 39 |                                                                     | 18b | Plans to promote participant retention and complete follow-up, including list of any outcome data to be collected for participants who discontinue or deviate from intervention protocols                                                                                                                                                                                                                    | 14 – 15 |
| 40 |                                                                     |     |                                                                                                                                                                                                                                                                                                                                                                                                              |         |
| 41 |                                                                     |     |                                                                                                                                                                                                                                                                                                                                                                                                              |         |
| 42 |                                                                     |     |                                                                                                                                                                                                                                                                                                                                                                                                              |         |

|    |                                 |     |                                                                                                                                                                                                                                                                                                                                       |                         |
|----|---------------------------------|-----|---------------------------------------------------------------------------------------------------------------------------------------------------------------------------------------------------------------------------------------------------------------------------------------------------------------------------------------|-------------------------|
| 1  | Data management                 | 19  | Plans for data entry, coding, security, and storage, including any related processes to promote data quality (eg, double data entry; range checks for data values). Reference to where details of data management procedures can be found, if not in the protocol                                                                     | 14 – 15                 |
| 2  |                                 |     |                                                                                                                                                                                                                                                                                                                                       |                         |
| 3  |                                 |     |                                                                                                                                                                                                                                                                                                                                       |                         |
| 4  |                                 |     |                                                                                                                                                                                                                                                                                                                                       |                         |
| 5  | Statistical methods             | 20a | Statistical methods for analysing primary and secondary outcomes. Reference to where other details of the statistical analysis plan can be found, if not in the protocol                                                                                                                                                              | 16 – 17                 |
| 6  |                                 |     |                                                                                                                                                                                                                                                                                                                                       |                         |
| 7  |                                 |     |                                                                                                                                                                                                                                                                                                                                       |                         |
| 8  |                                 | 20b | Methods for any additional analyses (eg, subgroup and adjusted analyses)                                                                                                                                                                                                                                                              | 16 – 17                 |
| 9  |                                 |     |                                                                                                                                                                                                                                                                                                                                       |                         |
| 10 |                                 | 20c | Definition of analysis population relating to protocol non-adherence (eg, as randomised analysis), and any statistical methods to handle missing data (eg, multiple imputation)                                                                                                                                                       | 16                      |
| 11 |                                 |     |                                                                                                                                                                                                                                                                                                                                       |                         |
| 12 |                                 |     |                                                                                                                                                                                                                                                                                                                                       |                         |
| 13 |                                 |     |                                                                                                                                                                                                                                                                                                                                       |                         |
| 14 | <b>Methods: Monitoring</b>      |     |                                                                                                                                                                                                                                                                                                                                       |                         |
| 15 |                                 |     |                                                                                                                                                                                                                                                                                                                                       |                         |
| 16 | Data monitoring                 | 21a | Composition of data monitoring committee (DMC); summary of its role and reporting structure; statement of whether it is independent from the sponsor and competing interests; and reference to where further details about its charter can be found, if not in the protocol. Alternatively, an explanation of why a DMC is not needed | 18                      |
| 17 |                                 |     |                                                                                                                                                                                                                                                                                                                                       |                         |
| 18 |                                 |     |                                                                                                                                                                                                                                                                                                                                       |                         |
| 19 |                                 |     |                                                                                                                                                                                                                                                                                                                                       |                         |
| 20 |                                 |     |                                                                                                                                                                                                                                                                                                                                       |                         |
| 21 |                                 |     |                                                                                                                                                                                                                                                                                                                                       |                         |
| 22 |                                 | 21b | Description of any interim analyses and stopping guidelines, including who will have access to these interim results and make the final decision to terminate the trial                                                                                                                                                               | 18                      |
| 23 |                                 |     |                                                                                                                                                                                                                                                                                                                                       |                         |
| 24 |                                 |     |                                                                                                                                                                                                                                                                                                                                       |                         |
| 25 | Harms                           | 22  | Plans for collecting, assessing, reporting, and managing solicited and spontaneously reported adverse events and other unintended effects of trial interventions or trial conduct                                                                                                                                                     | 17 – 18                 |
| 26 |                                 |     |                                                                                                                                                                                                                                                                                                                                       |                         |
| 27 |                                 |     |                                                                                                                                                                                                                                                                                                                                       |                         |
| 28 | Auditing                        | 23  | Frequency and procedures for auditing trial conduct, if any, and whether the process will be independent from investigators and the sponsor                                                                                                                                                                                           | 18, supplemental file 4 |
| 29 |                                 |     |                                                                                                                                                                                                                                                                                                                                       |                         |
| 30 |                                 |     |                                                                                                                                                                                                                                                                                                                                       |                         |
| 31 |                                 |     |                                                                                                                                                                                                                                                                                                                                       |                         |
| 32 | <b>Ethics and dissemination</b> |     |                                                                                                                                                                                                                                                                                                                                       |                         |
| 33 |                                 |     |                                                                                                                                                                                                                                                                                                                                       |                         |
| 34 | Research ethics approval        | 24  | Plans for seeking research ethics committee/institutional review board (REC/IRB) approval                                                                                                                                                                                                                                             | 17                      |
| 35 |                                 |     |                                                                                                                                                                                                                                                                                                                                       |                         |
| 36 |                                 |     |                                                                                                                                                                                                                                                                                                                                       |                         |
| 37 | Protocol amendments             | 25  | Plans for communicating important protocol modifications (eg, changes to eligibility criteria, outcomes, analyses) to relevant parties (eg, investigators, REC/IRBs, trial participants, trial registries, journals, regulators)                                                                                                      | 17                      |
| 38 |                                 |     |                                                                                                                                                                                                                                                                                                                                       |                         |
| 39 |                                 |     |                                                                                                                                                                                                                                                                                                                                       |                         |
| 40 |                                 |     |                                                                                                                                                                                                                                                                                                                                       |                         |
| 41 |                                 |     |                                                                                                                                                                                                                                                                                                                                       |                         |
| 42 |                                 |     |                                                                                                                                                                                                                                                                                                                                       |                         |



|    |                               |     |                                                                                                                                                                                                                                                                                     |                         |
|----|-------------------------------|-----|-------------------------------------------------------------------------------------------------------------------------------------------------------------------------------------------------------------------------------------------------------------------------------------|-------------------------|
| 1  | Consent or assent             | 26a | Who will obtain informed consent or assent from potential trial participants or authorised surrogates, and how (see Item 32)                                                                                                                                                        | 10, supplemental file 3 |
| 2  |                               |     |                                                                                                                                                                                                                                                                                     |                         |
| 3  |                               |     |                                                                                                                                                                                                                                                                                     |                         |
| 4  |                               | 26b | Additional consent provisions for collection and use of participant data and biological specimens in ancillary studies, if applicable                                                                                                                                               | N/A                     |
| 5  |                               |     |                                                                                                                                                                                                                                                                                     |                         |
| 6  |                               |     |                                                                                                                                                                                                                                                                                     |                         |
| 7  | Confidentiality               | 27  | How personal information about potential and enrolled participants will be collected, shared, and maintained in order to protect confidentiality before, during, and after the trial                                                                                                | 15                      |
| 8  |                               |     |                                                                                                                                                                                                                                                                                     |                         |
| 9  |                               |     |                                                                                                                                                                                                                                                                                     |                         |
| 10 | Declaration of interests      | 28  | Financial and other competing interests for principal investigators for the overall trial and each study site                                                                                                                                                                       | 24                      |
| 11 |                               |     |                                                                                                                                                                                                                                                                                     |                         |
| 12 |                               |     |                                                                                                                                                                                                                                                                                     |                         |
| 13 | Access to data                | 29  | Statement of who will have access to the final trial dataset, and disclosure of contractual agreements that limit such access for investigators                                                                                                                                     | 15                      |
| 14 |                               |     |                                                                                                                                                                                                                                                                                     |                         |
| 15 |                               |     |                                                                                                                                                                                                                                                                                     |                         |
| 16 |                               |     |                                                                                                                                                                                                                                                                                     |                         |
| 17 | Ancillary and post-trial care | 30  | Provisions, if any, for ancillary and post-trial care, and for compensation to those who suffer harm from trial participation                                                                                                                                                       | Supplemental file 3     |
| 18 |                               |     |                                                                                                                                                                                                                                                                                     |                         |
| 19 |                               |     |                                                                                                                                                                                                                                                                                     |                         |
| 20 | Dissemination policy          | 31a | Plans for investigators and sponsor to communicate trial results to participants, healthcare professionals, the public, and other relevant groups (eg, via publication, reporting in results databases, or other data sharing arrangements), including any publication restrictions | 18                      |
| 21 |                               |     |                                                                                                                                                                                                                                                                                     |                         |
| 22 |                               |     |                                                                                                                                                                                                                                                                                     |                         |
| 23 |                               |     |                                                                                                                                                                                                                                                                                     |                         |
| 24 |                               | 31b | Authorship eligibility guidelines and any intended use of professional writers                                                                                                                                                                                                      | 18                      |
| 25 |                               |     |                                                                                                                                                                                                                                                                                     |                         |
| 26 |                               | 31c | Plans, if any, for granting public access to the full protocol, participant-level dataset, and statistical code                                                                                                                                                                     | 18                      |
| 27 |                               |     |                                                                                                                                                                                                                                                                                     |                         |
| 28 |                               |     |                                                                                                                                                                                                                                                                                     |                         |
| 29 | <b>Appendices</b>             |     |                                                                                                                                                                                                                                                                                     |                         |
| 30 |                               |     |                                                                                                                                                                                                                                                                                     |                         |
| 31 | Informed consent materials    | 32  | Model consent form and other related documentation given to participants and authorised surrogates                                                                                                                                                                                  | Supplemental file 3     |
| 32 |                               |     |                                                                                                                                                                                                                                                                                     |                         |
| 33 |                               |     |                                                                                                                                                                                                                                                                                     |                         |
| 34 | Biological specimens          | 33  | Plans for collection, laboratory evaluation, and storage of biological specimens for genetic or molecular analysis in the current trial and for future use in ancillary studies, if applicable                                                                                      | N/A                     |
| 35 |                               |     |                                                                                                                                                                                                                                                                                     |                         |
| 36 |                               |     |                                                                                                                                                                                                                                                                                     |                         |

37 \*It is strongly recommended that this checklist be read in conjunction with the SPIRIT 2013 Explanation & Elaboration for important clarification on the items.  
 38 Amendments to the protocol should be tracked and dated. The SPIRIT checklist is copyrighted by the SPIRIT Group under the Creative Commons  
 39 "[Attribution-NonCommercial-NoDerivs 3.0 Unported](https://creativecommons.org/licenses/by-nc-nd/3.0/)" license.  
 40

# Trial subject information for participation in medical-scientific trials

## Additional oxygen for BPD

“Supplemental oxygen in children with bronchopulmonary dysplasia (BPD) following the neonatal intensive care period: the SOS BPD study”

### Introduction

Dear Sir/Madam,

You are receiving this letter because your child has bronchopulmonary dysplasia (BPD) and requires supplemental oxygen. We kindly request that you allow your child to take part in a medical-scientific trial. Participation is on a voluntary basis. To take part, you will have to give us consent in writing.

Before you decide whether or not to take part in the trial, we will explain what exactly the trial entails. Please read this information through carefully and ask the researcher for further explanation if you have any questions. Alternatively, you can ask the independent expert, specified at the bottom of this letter, for additional information. You may also discuss it with your partner, friends or family.

Further information about participating in trials can be found on the website of the Rijksoverheid: [www.rijksoverheid.nl/mensenonderzoek](http://www.rijksoverheid.nl/mensenonderzoek).

### 1. General information

This trial has been set up by paediatricians from the Sophia Children's Hospital (Rotterdam), the Emma Children's Hospital (Amsterdam) and the Beatrix Children's Hospital (Groningen) and is being conducted by paediatricians in different hospitals across the country.

This trial requires 198 children from the Netherlands who have BPD. The Erasmus MC medical ethics review committee has approved this trial. General information about reviewing trials can be found in the 'Medical-scientific trials' brochure.

### 2. Aim of the trial

The aim of this trial is to find out what the best lower saturation limit ('the oxygen content in the blood') is to withdraw supplemental oxygen from children with BPD. In this trial, we are comparing a lower limit of 90% with a lower limit of 95%. Or, is it better to keep the saturation higher or the same as 95% or is 90% just as good?

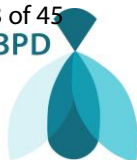

### 3. Background to the trial

Supplemental oxygen is the main treatment for children with BPD. However, it has never been investigated what a safe lower saturation limit is in children with BPD after the first few weeks of life, from week 36 of the pregnancy onwards. Both too much and too little oxygen can have serious consequences. Too little oxygen can lead to poorer increase in weight and thereby also poorer lung development and more lung complaints. Too little oxygen can also lead to a higher risk of cot death and be detrimental to development. Too much oxygen is also harmful to the lungs and brain, especially in premature children. Most hospitals observe a lower saturation limit of 90%; however, international guidelines advise 93-95%. But the higher the lower saturation limit should be, the longer children are given additional oxygen and the more frequently they will go home with it.

### 4. What participation entails

If you wish to allow your child to take part in the trial, we will follow your child's progress up to 1 year after the due date of the pregnancy.

#### When is your child able to participate?

Your child may take part in the trial from the moment that the pregnancy would have reached 36 weeks onwards. At that time, your child should still require supplemental oxygen, otherwise he or she will not be able to take part. The children participating in the trial are randomly distributed between 2 groups: in one group, we withdraw the supplemental oxygen at a lower limit of 90%; in the other group, at a lower limit of 95%. Fate decides in what group your child ends up; you and the physicians and researchers don't have any influence over this.

#### Visits and measurements

The trial will take 1 year to complete. During that year, you will visit the hospital twice, when your child is 6 and 12 months of age respectively. These are the standard visits that always take place after (extreme) prematurity, even if you aren't taking part in the trial. The visit will take around 1 hour. During each visit, we will weigh and measure your child and ask about lung complaints, hospital admissions and doctors' visits. Part of the standard treatment in some hospitals includes: a lung function test (by wearing a mask on the face), a CT scan, a sleep study and/or an ultrasound of the heart. The physician treating your child will tell you whether this happens in your hospital too. If your child takes part in the SOS BPD trial, the visit to the outpatients' clinic won't be any different or longer than it usually would be. We will, however, collect the data from the visits for the trial.

In addition to the standard outpatient visits, we will also ask you to answer a number of questions 3 times before the trial by means of a questionnaire sent to you via the internet. This will happen at the beginning of the study, when your child is 6 months old and when your child is 12 months old. The questionnaire will take around 20 minutes to complete. You will also receive a monthly e-mail asking whether your child has been ill, has been given any medication or has been admitted to hospital recently. You will also have the opportunity to make notes on a secure page on the trial website.

1  
2  
3  
4  
5 As long as your child is receiving supplemental oxygen, we will ask your physician or yourself  
6 (if your child is going home with oxygen) to actively withdraw the oxygen. Oxygen is usually  
7 withdrawn in consultation between you and the physician treating your child. For the trial, we  
8 will ask you or the physician treating your child to download the saturations from the  
9 saturation meter twice a week (or once a week if your child is at home with oxygen) and to e-  
10 mail the readings to the researchers. This will be explained to you if you decide to take part in  
11 the trial. If the downloaded data reveal that your child is exceeding the lower limit of 90 or  
12 95% too frequently, we will ask the doctor or you to withdraw the oxygen faster. It may also  
13 become apparent that your child is falling under the lower limit just that bit too frequently, in  
14 which case we will ask you or your doctor to turn the oxygen level up.  
15  
16  
17  
18

### 19 **Different to the usual care**

20 The visits at 6 and 12 months are standard visits. At this age, all premature children are  
21 monitored in the neonatal centre, so these do not constitute additional visits. The  
22 questionnaires and the monthly e-mails are additional, however. What's more, the  
23 adjustments to your child's oxygen are also different: this happens using the data from the  
24 saturation meter which we will ask you to download.  
25  
26  
27  
28

### 29 **5. What is expected of you?**

30 Participation in the trial means:

- 31 - That we will ask you and your doctor to observe the agreed saturation limit
- 32 - That we will ask you to keep a note of any admissions, doctors' visits and complaints
- 33 in an online diary
- 34 - That in some hospitals, an additional test will be conducted: a lung function test
- 35 which involves wearing a mask on the face.  
36  
37  
38  
39

### 40 **6. Potential detrimental effects**

41 This trial is being conducted because we don't know what's best for children with BPD: a  
42 lower limit of 90% or of 95%. Most hospitals currently maintain a lower limit of 90%. The  
43 benefit of this is that children are able to stop taking oxygen more quickly and don't go home  
44 with oxygen as frequently. The disadvantage could be that children and their lungs don't grow  
45 as well. Too low a volume of oxygen could also affect development. The advantage of a  
46 lower limit of 95% is that we expect children to grow better and therefore develop more  
47 healthy lung tissue. The disadvantage is that children are given additional oxygen for longer  
48 and will go home with it more frequently. Too much oxygen can also be harmful to the lungs.  
49  
50  
51  
52  
53  
54  
55  
56

### 57 **7. Potential advantages and disadvantages**

58  
59  
60

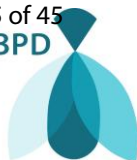

1  
2  
3 It is important that you weigh up the potential advantages and disadvantages carefully before  
4 deciding to take part. A higher lower limit for the oxygen may cause growth/lung growth to  
5 improve, but this isn't guaranteed.  
6  
7

8 Disadvantages of participating in the trial are: potential detrimental effects on the trial  
9 measurements.  
10

11 Participation in the trial also means:

- 12 - the child may have to use oxygen at home for longer
- 13 - that you will have agreements (in relation to the lower oxygen limit, in particular) that  
14 you will have to observe.  
15  
16  
17  
18

19 It is important that you weigh up the potential advantages and disadvantages carefully before  
20 deciding to take part.  
21  
22

## 23 **8. Your child's resistance**

24 Your child could be resistant (refuse to cooperate) during the trial, in which case, the  
25 researcher would have to stop the trial straight away. It is difficult to describe exactly what  
26 resistance is. Before the start of the trial, we will discuss with you what is understood by  
27 resistance. The researcher will abide by the Code of Conduct for the Resistance of Under-  
28 Aged Patients.  
29  
30  
31  
32

## 33 **9. If you do not wish to participate in or wish to stop the trial**

34 It is up to you whether your child takes part in the trial. Participation is entirely voluntary in  
35 nature.  
36

37 If you do not want your child to take part, your child will be treated for BPD in the usual  
38 manner. That means that the doctor treating your child will decide the lower saturation limit  
39 with you.  
40  
41  
42

43 If you do decide to participate, you can change your mind at any time and stop, even during  
44 the trial. Once again, your child will be treated the usual way without having to state your  
45 reasons for doing so. However, you will need to report this to the researcher straight away.  
46 The data that has been collected up to that moment will be used for the trial.  
47  
48

49 If there is new information about the trial that is important for you, please allow the researcher  
50 to tell you. You will then be asked whether you wish to continue to take part.  
51  
52

## 53 **10. End of the trial**

54 Your child's participation in the trial will stop once:

- 55 - all visits are over
- 56 - you yourself decide to stop
- 57 - the researcher or your child's doctor thinks it's better if your child stops  
58  
59  
60

- the authorities or the assessing medical ethics review committee decides to stop the trial.

The entire trial is over once all participants have finished.

After processing all the data, the researcher will notify you of the main results of the trial.

Because the entire trial takes three-and-a-half years to complete, it can take a while before you can expect the results.

## **11. Use and retention of your child’s data**

For this trial, it is necessary to collect and use medical and personal data relating to your child. This is necessary to answer the questions asked in this trial and to publish the results.

### **Confidentiality of your child’s data**

To protect your child’s privacy, each trial subject is given a code which is stated on the data. The name and other personal data that could be used to identify your child are omitted. The researcher is the only person who knows your child’s code. The key for the code remains with the researcher. Even in reports about the trial, only that code is used.

### **Access to the data**

Some people may view your child’s medical and personal data to verify whether the trial has been conducted properly and reliably. General information about this can be found in the ‘Medical-scientific trials’ brochure.

People who are able to view your data are: the research team, the safety committee monitoring the trial, an auditor who has been brought in by the researchers of the trial and the Dutch Health Care Inspectorate. They will keep your data confidential. When you sign the consent form, you are consenting to the collection, retention and viewing of your medical and personal data.

### **Data retention period**

The researcher will retain your child’s data for a period of 15 years in accordance with the statutory retention period.

### **Withdrawing consent**

You can withdraw your consent to the use of personal data again at any time. This applies both to this trial and to its retention and use for any future trials. Trial data collected up to the moment you withdraw your consent will then still be used in the research.

### **Further information about your rights when processing data**

For general information about your rights when processing your personal data, you may consult the Dutch Data Protection Authority’s website ([www.autoriteitpersoonsgegevens.nl](http://www.autoriteitpersoonsgegevens.nl)).

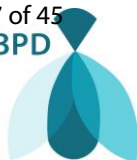

1  
2  
3 If you have any questions about your rights, please contact the data controller responsible for  
4 the processing of your personal data, See enclosure A for contact details.  
5  
6

7 If you have any questions or complaints about the processing of your personal data, we  
8 advise contacting the trial location in the first instance. You may also contact the Data  
9 Protection Officer at the Erasmus MC or the Dutch Data Protection Authority.  
10  
11

### 12 **Registration of the clinical trial**

13 This trial also appears in a list of medical-scientific trials, namely the trial register  
14 ([www.trialregister.nl](http://www.trialregister.nl); trial code 7347). This website doesn't contain any information that can  
15 be traced back to your child. However, the website may show a summary of the results.  
16 General information about registering trials can be found in the 'Medical-scientific trials'  
17 brochure.  
18  
19

### 20 **12. Insurance for trial subjects**

21 Appropriate insurance will be taken out for everyone who decides to enter this trial. The  
22 insurance covers damage caused by the trial. It does not cover all damage. **Enclosure B**  
23 contains further information about the insurance, including who you can report damage to.  
24  
25

### 26 **13. Notifying the GP and/or treating specialist**

27 We always send your child's GP and/or treating paediatrician a letter to tell them that your  
28 child is taking part in the trial. This is for your child's own safety. If you do not agree to this,  
29 your child will not be able to take part in this trial. The GP or paediatrician will also receive a  
30 letter concerning the 6 and 12-month visits. This is also the norm even if your child is not  
31 taking part in the trial.  
32  
33

### 34 **14. No payment for participating**

35 The additional tests and treatment for the trial won't cost you anything. You will not receive  
36 payment for taking part in this trial.  
37  
38  
39  
40  
41  
42  
43  
44  
45  
46  
47  
48  
49  
50  
51  
52  
53  
54  
55  
56  
57  
58  
59  
60



## 15. Any questions?

If you have any questions, please contact the trial team. For independent advice about taking part in this trial, please contact the independent doctor, Dr P.J.F.M. Merkus. He knows a great deal about this trial, but doesn't have anything to do with the trial.

In the event of complaints, please contact the complaints officer at your hospital. All information can be found in **Enclosure A**: Contact details.

## 16. Signing of consent form

Once you have had sufficient thinking time, you will be asked to decide about your child's participation in this trial. If you decide to take part and give consent, please confirm this in writing using the enclosed informed consent form. By giving written consent, you confirm that you have understood the information and agree to take part in the clinical trial.

The signatures page will be retained by the doctor treating your child. You will receive a copy of this consent form.

Thank you for taking the time to read this letter.



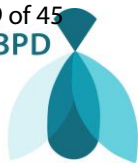

1  
2  
3  
4  
5  
6  
7  
8  
9  
10  
11  
12  
13  
14  
15  
16  
17  
18  
19  
20  
21  
22  
23  
24  
25  
26  
27  
28  
29  
30  
31  
32  
33  
34  
35  
36  
37  
38  
39  
40  
41  
42  
43  
44  
45  
46  
47  
48  
49  
50  
51  
52  
53  
54  
55  
56  
57  
58  
59  
60

**Enclosures to this information**

- A. Contact details
- B. Information about insurance
- C. Consent form

For peer review only

1  
2  
3  
4  
5  
6  
7  
8  
9  
10  
11  
12  
13  
14  
15  
16  
17  
18  
19  
20  
21  
22  
23  
24  
25  
26  
27  
28  
29  
30  
31  
32  
33  
34  
35  
36  
37  
38  
39  
40  
41  
42  
43  
44  
45  
46  
47  
48  
49  
50  
51  
52  
53  
54  
55  
56  
57  
58  
59  
60

## Enclosure A: contact details for *name hospital*

### Researcher at *name hospital*:

*Local principle investigator.*

Telephone number: xxxxx. E-mail: xxxxxx

### Coordinating researcher:

Ms S.J.A. Balink, research physician at Erasmus MC - Sophia Children's Hospital.

Telephone number: +31 (0)6 500 33994. E-mail: sosbpd@erasmusmc.nl.

### Independent doctor:

Dr P.J.F.M. Merkus, paediatric pulmonologist, Amalia Children's Hospital, Radboud UMC

Nijmegen. Telephone number: +31 (0)24 361 4430. E-mail: Peter.Merkus@radboudumc.nl

### Complaints:

*Hospital format*

### Data Protection Officer:

*Hospital format*

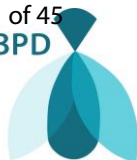

## Enclosure B: information about insurance

Erasmus MC has taken out insurance for everyone taking part in this trial. The insurance covers damage caused as a result of taking part in the trial. This applies to damage caused during the trial or within four years of the end of the trial. Claims must be submitted to the insurer within this four-year period.

This insurance policy does not cover all damage. You will find a brief outline of the exceptions below.

The full version of these provisions are included in the Compulsory Insurance for Medical Research Involving Human Subjects Decree, which can be consulted at [www.ccmo.nl](http://www.ccmo.nl), the website of the Central Committee on Research Involving Human Subjects (go to 'Bibliotheek' and select 'Wet- en regelgeving').

In case of damage, submit your claim directly to the insurer.

The insurer for this clinical trial is:

|                   |                                      |
|-------------------|--------------------------------------|
| Name:             | CNA Insurance Company Limited        |
| Address:          | Polarisavenue 140, 2134 JX Hoofddorp |
| Telephone number: | +31 (0)23 303 6004                   |
| E-mail:           | Esther.vanherk@cnaeurope.com         |
| Policy number:    | 10.220.695                           |
| Contact person:   | Ms Esther Van Herk                   |

The insurance offers coverage of €650,000 per trial subject and €5,000,000 for the entire trial and €7,500,000 per year for all trials conducted by the Erasmus MC.

The following damage is **not** covered by the insurance policy:

- damage caused by a risk of which you were informed in the written information. This does not apply if the materialisation of the risk is more severe than foreseen or if materialisation of the risk was highly unlikely.
- damage to your health that would also have materialised if you had not entered the clinical trial;
- damage as a result of failure to follow directions or instructions or failure to follow these in full;
- damage to your descendants caused by an adverse effect of the trial on you or your descendants;
- damage caused by an existing treatment method in the case of research into existing treatment methods.

## Enclosure C: Consent form for parents or guardians

### Additional oxygen for BPD

I have been asked to give my consent to my child's participation in this medical-scientific trial:

Name of child: \_\_\_\_\_ Date of birth: \_\_ / \_\_ / \_\_

- I have read the information letter for parents/guardians. I was also able to ask questions. My questions have been answered satisfactorily. I had enough time to decide whether or not to enter my child in the trial.
- I know that participation is voluntary. I also know that I may decide to withdraw my child from the trial at any time, without having to state any reasons for doing so.
- I give my consent to the GP/paediatrician treating my child being informed that my child is taking part in this trial.
- I give my consent to the requesting of information from the paediatrician treating my child concerning my child's hospital admissions.
- I am aware that some people are able to view my child's data. The people in question are specified in this information letter.
- I give my consent to the use of the data in the manner and for the purposes stated in the information letter.
- I give my consent to my child's data being retained at the trial location for a period of 15 years after this trial has finished.
- I give my consent to the use of my e-mail address, only for this trial.
- I  **do\***  
 **do not**  
give my consent to my child being contacted again about a follow-up trial once this trial has ended.
- I agree to my child taking part in this clinical trial.

Name of parent/guardian 1: .....

Signature: \_\_\_\_\_ Date: \_\_ / \_\_ / \_\_

E-mail address: .....

Name of parent/guardian 2: .....

Signature: \_\_\_\_\_ Date: \_\_ / \_\_ / \_\_

E-mail address: .....



1  
2  
3  
4  
5  
6  
7  
8  
9  
10  
11  
12  
13  
14  
15  
16  
17  
18  
19  
20  
21  
22  
23  
24  
25  
26  
27  
28  
29  
30  
31  
32  
33  
34  
35  
36  
37  
38  
39  
40  
41  
42  
43  
44  
45  
46  
47  
48  
49  
50  
51  
52  
53  
54  
55  
56  
57  
58  
59  
60

-----

I hereby declare that I have notified in full the above-mentioned person/persons about the named trial.

If any information were to emerge during the trial that could affect the parent's or guardian's consent, I shall notify him/her in due time.

Clinical researcher's name (or his/her representative):

Signature: \_\_\_\_\_ Date: \_\_ / \_\_ / \_\_

Additional information has been provided by:

Name:

Position:

Signature \_\_\_\_\_ Date: \_\_ / \_\_ / \_\_

\* Place a cross next to that which is applicable.

For peer review only

## Supplemental file 4: Audit frequency and procedures

### Monitoring frequency

| Visit no.                                                            | Selected Sites              | Planning*                                                                                                                                                                      |
|----------------------------------------------------------------------|-----------------------------|--------------------------------------------------------------------------------------------------------------------------------------------------------------------------------|
| Initiation Visit                                                     | All                         | Before enrolment of the first subject, but after Ethics Committee and Board of Deans approval has been obtained.                                                               |
| First Monitoring Visit A                                             | All participating sites     | After 2 - 3 randomised subjects, irrespective of (e)CRF completion.                                                                                                            |
| First Monitoring Visit B                                             | All 10 NICUs                | Only if not including subjects so when Visit A has not been performed.<br>After 5 - 6 randomised subjects have completed the 6 month visit, irrespective of (e)CRF completion. |
| Remote Visit                                                         | All sites                   | Contact via telephone or email approximately 12 weeks after the First Monitoring Visit A or B                                                                                  |
| Second Monitoring Visit                                              | 5 high recruiting sites     | After all subjects have been randomised, the 5 sites who have randomised the most subjects                                                                                     |
| Remote Visit                                                         | All 5 high recruiting sites | Contact via telephone or email approximately 12 weeks after the Second Monitoring Visit                                                                                        |
| Remote Close Out                                                     | All sites                   | After database lock                                                                                                                                                            |
| TMF check in combinations with check on 6 months FU data if possible | Sponsor site                | In 2019 and 2022                                                                                                                                                               |

\*The frequency may be changed based on the total enrolment period, the inclusion rate, quality issues and/ or site performance, but only after consultation with the Coordinating PI.

### Monitoring procedures

The follow items will be discussed/ verified by the Clinical Research Associate (CRA) during the different visits.

#### *First Monitoring Visit*

- Who is/ are the contact person(s) at site

- 1
- 2
- 3
- 4
- 5
- 6
- 7
- 8
- 9
- 10
- 11
- 12
- 13
- 14
- 15
- 16
- 17
- 18
- 19
- 20
- 21
- 22
- 23
- 24
- 25
- 26
- 27
- 28
- 29
- 30
- 31
- 32
- 33
- 34
- 35
- 36
- 37
- 38
- 39
- 40
- 41
- 42
- 43
- 44
- 45
- 46
- 47
- 48
- 49
- 50
- 51
- 52
- 53
- 54
- 55
- 56
- 57
- 58
- 59
- 60
- Is the entire investigators' study staff adequately informed about the study e.g. randomisation procedure, sample collection, procedures in case of protocol deviations/ serious breaches, SAE notification procedures etc.
- Is the entire investigators' study staff WMO/GCP trained and authorized (site signature and delegation log)
- Has the study staff sufficient time to perform the study?
- How and by whom is the subject informed about the study?
- By whom is consent obtained and is it properly documented?
- Who will examine the subject every visit?
- Who performs the screening, baseline and other visits/ how is this arranged?
- Which source documents are available?
- Source Data Review
- Source Data Verification
- Where is the source data stored?
- Who will maintain the subject identification code list/ screening log/ enrolment log?
- Who is completing the (e)CRF?
- When/ how/ where and by who are questionnaires filled in?
- Which facilities are used (any changes)?
- Which equipment is used (any changes)?
- Have any Serious Adverse Events (SAEs) occurred?
- Reporting of SAE's
- Are there any known protocol deviations and/ or serious breaches of ICH-GCP and/ or protocol?
- Is the Trial Master File/ Investigator Site File up to date (AMC SOP CTR 006/ ICH-GCP guideline 8.1 – 8.3)?
- What is the expected recruitment rate?
- Competitive studies running?
- Informed consent process, use of Patient Information Form and Informed Consent form
- In- and exclusion criteria

#### ***Remote Visits***

- Discuss progress of follow-up of action items
- Is the enrolment overview up to date (amount screened subjects, amount of screen failures/withdrawn subjects, amount of randomised/enrolled subjects, amount of active subjects, amount of subjects in follow-up and amount of subjects that have completed the trial)?
- Are there any changes in the investigators' study staff (trained and authorized)?
- Are there any changes in facilities or equipment?
- Have any SAEs been reported since previous on-site monitor visit?
- Are there any known protocol deviations and/or serious breaches of ICH-GCP and/or protocol?

#### ***Ongoing Monitoring Visits***

- Is the entire investigators' study staff adequately informed about the study?

- 1  
2  
3  
4  
5  
6  
7  
8  
9  
10  
11  
12  
13  
14  
15  
16  
17  
18  
19  
20  
21  
22  
23  
24  
25  
26  
27  
28  
29  
30  
31  
32  
33  
34  
35  
36  
37  
38  
39  
40  
41  
42  
43  
44  
45  
46  
47  
48  
49  
50  
51  
52  
53  
54  
55  
56  
57  
58  
59  
60
- Is the entire investigators' study staff WMO/GCP trained and authorized (site signature and delegation log)
  - Are there any changes in the investigators' study staff (trained and authorized)?
  - Are there any changes in facilities or equipment?
  - Is the investigational medicinal product accountability properly documented?
  - Have any SAEs occurred?
  - Are there any known protocol deviations and/or serious breaches of ICH-GCP and/or protocol?
  - Is the Trial Master File/ Investigator Site File up to date (AMC SOP CTR 006/ICH-GCP guideline 8.1 – 8.3)?
  - Are there any new amendments in place?

For peer review only



# BMJ Open

## Supplemental oxygen strategies in infants with bronchopulmonary dysplasia after the Neonatal Intensive Care Unit period: study protocol for a randomised controlled trial (SOS BPD study)

|                                 |                                                                                                                                                                                                                                                                                                                                                                                                                                                                                                                                                                                                                                                                                                                                                                                                                                                                                                                                                                                                                                                                                                                                                                                                                                                                                                                                                                                                                                                                                                                                                                                                                                                                                                                 |
|---------------------------------|-----------------------------------------------------------------------------------------------------------------------------------------------------------------------------------------------------------------------------------------------------------------------------------------------------------------------------------------------------------------------------------------------------------------------------------------------------------------------------------------------------------------------------------------------------------------------------------------------------------------------------------------------------------------------------------------------------------------------------------------------------------------------------------------------------------------------------------------------------------------------------------------------------------------------------------------------------------------------------------------------------------------------------------------------------------------------------------------------------------------------------------------------------------------------------------------------------------------------------------------------------------------------------------------------------------------------------------------------------------------------------------------------------------------------------------------------------------------------------------------------------------------------------------------------------------------------------------------------------------------------------------------------------------------------------------------------------------------|
| Journal:                        | <i>BMJ Open</i>                                                                                                                                                                                                                                                                                                                                                                                                                                                                                                                                                                                                                                                                                                                                                                                                                                                                                                                                                                                                                                                                                                                                                                                                                                                                                                                                                                                                                                                                                                                                                                                                                                                                                                 |
| Manuscript ID                   | bmjopen-2022-060986.R1                                                                                                                                                                                                                                                                                                                                                                                                                                                                                                                                                                                                                                                                                                                                                                                                                                                                                                                                                                                                                                                                                                                                                                                                                                                                                                                                                                                                                                                                                                                                                                                                                                                                                          |
| Article Type:                   | Protocol                                                                                                                                                                                                                                                                                                                                                                                                                                                                                                                                                                                                                                                                                                                                                                                                                                                                                                                                                                                                                                                                                                                                                                                                                                                                                                                                                                                                                                                                                                                                                                                                                                                                                                        |
| Date Submitted by the Author:   | 16-May-2022                                                                                                                                                                                                                                                                                                                                                                                                                                                                                                                                                                                                                                                                                                                                                                                                                                                                                                                                                                                                                                                                                                                                                                                                                                                                                                                                                                                                                                                                                                                                                                                                                                                                                                     |
| Complete List of Authors:       | <p>Balink, Stephanie; Erasmus MC Sophia Children Hospital, Paediatrics/Paediatric Respiratory Medicine<br/> Onland, Wes; Amsterdam UMC Locatie AMC, Department of Paediatrics, Division of Neonatology; Amsterdam UMC Locatie VUmc, Department of Paediatrics, Division of Neonatology<br/> Vrijlandt, Elianne; UMCG, Department of Paediatrics, Division of Paediatric Pulmonology and Allergology<br/> Andrinopoulou, Eleni-Rosalina; Erasmus Medical Center, Department of Biostatistics, Department of Epidemiology<br/> Bos, Arend; UMCG, Department of Paediatrics, Division of Neonatology<br/> Dijk, Peter; UMCG, Department of Paediatrics, Division of Neonatology<br/> Goossens, Lucas; Erasmus Universiteit Rotterdam Erasmus School of Health Policy and Management<br/> Hulsmann, Anthon; Amphia Hospital, Department of Paediatrics<br/> Nuytemans, Debbie; Amsterdam UMC Locatie AMC, Department of Paediatrics, Division of Neonatology; Amsterdam UMC Locatie VUmc, Department of Paediatrics, Division of Neonatology<br/> Reiss, Irwin; Erasmus MC Sophia Children Hospital, Paediatrics, Division of neonatology<br/> Sprij, Arwen; Haga Hospital, Department of Paediatrics<br/> Kroon, André; Erasmus MC Sophia Children Hospital, Department of Paediatrics, Division of Neonatology<br/> van Kaam, Anton; Amsterdam UMC Locatie AMC, Department of Paediatrics, Division of Neonatology; Amsterdam UMC Locatie VUmc, Department of Paediatrics, Division of Neonatology<br/> Pijnenburg, Marielle; Erasmus MC Sophia Children Hospital, Department of Paediatrics/ Paediatric Respiratory Medicine<br/> the SOS BPD study group, on behalf of; Erasmus MC Sophia Children Hospital</p> |
| <b>Primary Subject Heading</b>: | Paediatrics                                                                                                                                                                                                                                                                                                                                                                                                                                                                                                                                                                                                                                                                                                                                                                                                                                                                                                                                                                                                                                                                                                                                                                                                                                                                                                                                                                                                                                                                                                                                                                                                                                                                                                     |
| Secondary Subject Heading:      | Health economics, Medical management, Respiratory medicine                                                                                                                                                                                                                                                                                                                                                                                                                                                                                                                                                                                                                                                                                                                                                                                                                                                                                                                                                                                                                                                                                                                                                                                                                                                                                                                                                                                                                                                                                                                                                                                                                                                      |
| Keywords:                       | Neonatal intensive & critical care < INTENSIVE & CRITICAL CARE, NEONATOLOGY, Paediatric thoracic medicine < PAEDIATRIS                                                                                                                                                                                                                                                                                                                                                                                                                                                                                                                                                                                                                                                                                                                                                                                                                                                                                                                                                                                                                                                                                                                                                                                                                                                                                                                                                                                                                                                                                                                                                                                          |

1  
2  
3  
4  
5  
6  
7  
8  
9  
10  
11  
12  
13  
14  
15  
16  
17  
18  
19  
20  
21  
22  
23  
24  
25  
26  
27  
28  
29  
30  
31  
32  
33  
34  
35  
36  
37  
38  
39  
40  
41  
42  
43  
44  
45  
46  
47  
48  
49  
50  
51  
52  
53  
54  
55  
56  
57  
58  
59  
60

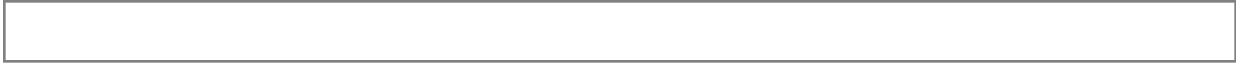

SCHOLARONE™  
Manuscripts

1  
2  
3 **1 Supplemental oxygen strategies in infants with bronchopulmonary dysplasia after the**  
4  
5 **2 Neonatal Intensive Care Unit period: study protocol for a randomised controlled trial**  
6  
7  
8 **3 (SOS BPD study)**  
9

10 4 S.J.A. Balink<sup>1</sup>, W. Onland<sup>2</sup>, E.J.L.E. Vrijlandt<sup>3</sup>, E.R. Andrinopoulou<sup>4</sup>, A.F. Bos<sup>5</sup>, P.H. Dijk<sup>5</sup>, L.M.A. Goossens<sup>6</sup>,  
11  
12 5 A.R. Hulsmann<sup>7</sup>, D.H. Nuytemans<sup>2</sup>, I.K.M. Reiss<sup>8</sup>, A.J. Sprij<sup>9</sup>, A.A. Kroon<sup>8</sup>, A.H. van Kaam<sup>2</sup>, M.W.H.  
13  
14 6 Pijnenburg<sup>1</sup>, on behalf of the SOS BPD study group  
15  
16 7

17  
18 8 <sup>1</sup>Department of Paediatrics/ Paediatric Respiratory Medicine, Erasmus MC – Sophia Children’s Hospital, University Medical  
19  
20 9 Center Rotterdam, Dr. Molewaterplein 40, 3015 GD Rotterdam, the Netherlands

21  
22 10 <sup>2</sup>Department of Paediatrics, Division of Neonatology, Amsterdam University Medical Centers, University of Amsterdam,  
23  
24 11 VU Medical Center, Emma Children’s Hospital, Meibergdreef 9, 1105 AZ Amsterdam-Zuidoost, The Netherlands

25  
26 12 <sup>3</sup>Department of Paediatrics, Division of Paediatric Pulmonology and Allergology, University Medical Centre Groningen,  
27  
28 13 Beatrix Children’s Hospital, Hanzeplein 1, 9713 GZ Groningen, The Netherlands

29  
30 14 <sup>4</sup>Department of Biostatistics, Department of Epidemiology, Erasmus Medical Center, University Medical Center, Rotterdam,  
31  
32 15 The Netherlands

33  
34 16 <sup>5</sup>Department of Paediatrics, Division of Neonatology, University Medical Centre Groningen, Beatrix Children’s Hospital,  
35  
36 17 Hanzeplein 1, 9713 GZ Groningen, The Netherlands

37  
38 18 <sup>6</sup>Erasmus School for Health Policy & Management, Erasmus University Rotterdam, P.O. Box 1738, 3000 DR Rotterdam  
39  
40 19 3000, the Netherlands

41  
42 20 <sup>7</sup>Department of Paediatrics, Amphia Hospital, Molengracht 21, 4818 CK Breda, The Netherlands

43  
44 21 <sup>8</sup>Department of Paediatrics, Division of Neonatology, Erasmus MC – Sophia Children’s Hospital, University Medical Center  
45  
46 22 Rotterdam, Dr. Molewaterplein 40, 3015 GD Rotterdam, the Netherlands

47  
48 23 <sup>9</sup>Department of Paediatrics, Haga Hospital, Els Borst-Eilersplein 275, 2545 AA The Hague, the Netherlands  
49  
50 24

51  
52 **25 Corresponding author:**

53  
54 26 Marielle W.H. Pijnenburg, email: [m.pijnenburg@erasmusmc.nl](mailto:m.pijnenburg@erasmusmc.nl). Department of Paediatrics/  
55  
56 27 Paediatric Respiratory Medicine, Erasmus MC – Sophia Children’s Hospital, University  
57  
58 28 Medical Center Rotterdam, Room SP-2430, P.O. Box 2060, 3000 CB Rotterdam  
59  
60 29

30 **Word count: 3672**

1  
2  
3  
4  
5  
6  
7  
8  
9  
10  
11  
12  
13  
14  
15  
16  
17  
18  
19  
20  
21  
22  
23  
24  
25  
26  
27  
28  
29  
30  
31  
32  
33  
34  
35  
36  
37  
38  
39  
40  
41  
42  
43  
44  
45  
46  
47  
48  
49  
50  
51  
52  
53  
54  
55  
56  
57  
58  
59  
60

31

32 **Keywords**

33 Bronchopulmonary dysplasia, prematurity, supplemental oxygen, growth, weight, lung  
34 function, oxygen saturation

For peer review only

1  
2  
3 **35 ABSTRACT**  
4

5 **36 Introduction:** Supplemental oxygen is the most important treatment for preterm born infants  
6  
7  
8 **37** with established bronchopulmonary dysplasia (BPD). However, it is unknown what oxygen  
9  
10 **38** saturation levels are optimal to improve outcomes in infants with established BPD from 36  
11  
12 **39** weeks postmenstrual age (PMA) onwards. The aim of this study is to compare the use of a  
13  
14 **40** higher oxygen saturation limit ( $\geq 95\%$ ) to a lower oxygen saturation limit ( $\geq 90\%$ ) after 36  
15  
16 **41** weeks PMA in infants diagnosed with moderate or severe BPD.

17  
18  
19 **42 Methods and analysis:** This non-blinded, multicentre, randomised controlled trial will  
20  
21 **43** recruit 198 preterm born infants with moderate or severe BPD between 36 and 38 weeks  
22  
23 **44** PMA. Infants will be randomised to either a lower oxygen saturation limit of 95% or to a  
24  
25 **45** lower limit of 90%; supplemental oxygen and/or respiratory support will be weaned based on  
26  
27 **46** the assigned lower oxygen saturation limit. Adherence to the oxygen saturation limit will be  
28  
29 **47** assessed by extracting oxygen saturation profiles from pulse oximeters regularly, until  
30  
31 **48** respiratory support is stopped. The primary outcome is the weight standard deviation score at  
32  
33 **49** six months corrected age. Secondary outcomes include anthropometrics collected at six and  
34  
35 **50** twelve months corrected age, re-hospitalizations, respiratory complaints, infant stress,  
36  
37 **51** parental quality of life and cost-effectiveness.

38  
39  
40 **52 Ethics and dissemination:** Ethical approval for the trial was obtained from the Medical  
41  
42 **53** Ethics Review Committee of the Erasmus University Medical Centre, Rotterdam, the  
43  
44 **54** Netherlands (MEC-2018-1515). Local approval for conducting the trial in the participating  
45  
46 **55** hospitals has been, or will be obtained from the local institutional review boards. Informed  
47  
48 **56** consent will be obtained from the parents or legal guardians of all study participants.

49  
50  
51 **57 Trial registration:** Dutch Trial Registry ([www.trialregister.nl](http://www.trialregister.nl)): NL7149 / NTR7347;  
52  
53  
54 **58** registered on July 10, 2018.

55  
56  
57  
58  
59  
60

1  
2  
3 **60 ARTICLE SUMMARY**  
4

5 **61 Strengths and limitations of this study**  
6

- 7
- 8 **62** • This is the first randomised controlled trial that aims to identify the optimal lower  
9  
10 **63** limit of oxygen saturation for infants with moderate or severe bronchopulmonary  
11  
12 **64** dysplasia to improve growth and respiratory health.  
13
- 14
- 15 **65** • Adherence to the assigned limit for weaning supplemental oxygen will be increased  
16  
17 **66** by collecting oxygen saturation profiles twice (in hospital) or once (at home) weekly.  
18
- 19 **67** • Limitations of this study are that the study is not blinded and that protocols amongst  
20  
21 **68** the participating centres to wean oxygen or respiratory support are not standardized.  
22  
23  
24  
25  
26  
27  
28  
29  
30  
31  
32  
33  
34  
35  
36  
37  
38  
39  
40  
41  
42  
43  
44  
45  
46  
47  
48  
49  
50  
51  
52  
53  
54  
55  
56  
57  
58  
59  
60

## 69 INTRODUCTION

70 Bronchopulmonary dysplasia (BPD) is the most common complication of extreme preterm  
71 birth. The pathogenesis of BPD is complex and multifactorial: pre- and postnatal risk factors  
72 such as intrauterine growth restriction, pregnancy-related hypertensive disorders, mechanical  
73 ventilation and infections all may impact on the immature, developing lungs of extremely  
74 preterm infants.(1) As a consequence, there is an arrest in lung development characterized by  
75 a decreased number of alveoli, which are larger and simplified, combined with small airway  
76 injury and abnormal development of the pulmonary vasculature.(2) Despite advances in  
77 perinatal and neonatal care, the incidence of BPD remains high, affecting almost half of  
78 infants born <28 weeks' gestation who survived to 36 weeks' postmenstrual age (PMA).(3)  
79 Infants with BPD may experience poor respiratory health and impaired lung function  
80 throughout childhood, even persisting into adulthood.(4, 5) Particularly the first years of life  
81 are characterized by prolonged use of supplemental oxygen, frequent respiratory symptoms  
82 and an increased risk of hospitalization.(6, 7) Having a child with BPD also poses an  
83 important burden on family life and is associated with a decreased quality of life of  
84 caregivers.(8)

85  
86 Supplemental oxygen is the most important treatment for preterm infants with established  
87 BPD. It reduces respiratory symptoms, reduces or prevents pulmonary hypertension and has  
88 possible beneficial effects on growth and neurodevelopment.(9) However, no study has ever  
89 examined the optimal oxygen saturation (SpO<sub>2</sub>) target in children with established BPD,  
90 while both too little and too much oxygen may lead to serious adverse events.(10) Few  
91 guidelines include recommendations for SpO<sub>2</sub> levels in infants with BPD. The European  
92 Respiratory Society guideline on long term management of children with BPD suggests the  
93 use of a lower limit of SpO<sub>2</sub> of 90% when using supplemental oxygen.(11) The American

94 Thoracic Society Guideline on home oxygen therapy suggests a level of 93% as minimum  
 95 threshold.(12) However, the level of evidence supporting these recommendations is low. This  
 96 has led to substantial practice variation in the applied SpO<sub>2</sub> limits in infants with BPD still  
 97 receiving respiratory support and/or supplemental oxygen after 36 weeks PMA.

98

99 In contrast to the limited evidence available *after* 36 weeks PMA, optimal SpO<sub>2</sub> targets have  
 100 been extensively studied in preterm infants *before* the age of 36 weeks PMA. The  
 101 Supplemental Therapeutic Oxygen for Prethreshold Retinopathy Of Prematurity (STOP-  
 102 ROP) trial, the Benefits Of Oxygen Saturation Targeting (BOOST) trial and the Neonatal  
 103 Oxygen Prospective Meta-analysis (NeOProM) Collaboration (including 5 randomised  
 104 controlled trials) all compared different SpO<sub>2</sub> targets in preterm infants before 36 weeks  
 105 PMA.(13-15) All trials studied slightly different SpO<sub>2</sub> target ranges (Table 1).

106

107 **Table 1. SpO<sub>2</sub> target ranges in different trials (13-15)**

| Trial                 | Lower SpO <sub>2</sub> range | Higher SpO <sub>2</sub> range |
|-----------------------|------------------------------|-------------------------------|
| STOP-ROP trial        | 89 – 94%                     | 96 – 99%                      |
| BOOST trial           | 91 – 94%                     | 95 – 98%                      |
| NeOProM Collaboration | 85 – 89%                     | 91 – 95%                      |

108 SpO<sub>2</sub> = oxygen saturation

109

110 The STOP-ROP trial found no differences in progression of retinopathy of prematurity, but  
 111 targeting a higher SpO<sub>2</sub> did lead to a higher incidence of respiratory morbidity (pneumonia or  
 112 exacerbations of chronic lung disease).(13) However, this study was not designed, nor  
 113 powered for respiratory outcomes. The BOOST trial found no differences between the two  
 114 groups on growth or neurodevelopment at 12 months corrected age, but infants in the higher



1  
2  
3 115 SpO<sub>2</sub> range had an increased length of oxygen therapy and required home oxygen more  
4  
5 116 often.(14) The meta-analysis of the NeOProM Collaboration showed that targeting a higher  
6  
7 117 SpO<sub>2</sub> range decreased the incidence of death and necrotizing enterocolitis, but the incidence  
8  
9 118 of retinopathy of prematurity requiring treatment was higher in the higher saturation group.  
10  
11 119 The use of supplemental oxygen at 36 weeks PMA was higher in the group with a higher  
12  
13 120 SpO<sub>2</sub> target range, due to the study protocol.(16) The incidence of blindness, severe hearing  
14  
15 121 loss and cerebral palsy was similar across the groups.(15)  
16  
17 122 Based on the outcomes of these studies, the American Academy of Pediatrics concluded that  
18  
19 123 the optimal SpO<sub>2</sub> range for extremely low birth weight infants remains unknown, but that an  
20  
21 124 SpO<sub>2</sub> range of 90 to 95% may be safer than 85 to 89%.(17)  
22  
23  
24  
25  
26 125  
27  
28 126 It is important to acknowledge that there are several reasons why the results of these oxygen  
29  
30 127 targeting studies before 36 weeks PMA may not be extrapolated to infants with established  
31  
32 128 BPD who have reached near term age. Firstly, the lungs have reached a new stage of  
33  
34 129 development as alveolar growth starts from approximately 36 weeks of gestation.(18) In  
35  
36 130 addition, there is a transition from lung development to lung growth in infancy and  
37  
38 131 childhood, as lung volume will increase about 23 times between birth and adulthood in  
39  
40 132 healthy subjects.(18) Secondly, it has been suggested that vulnerability to oxidative stress is  
41  
42 133 less pronounced at 36 weeks PMA compared to the first weeks of life as antioxidant systems  
43  
44 134 have matured. Thirdly, also the pulmonary vascular system undergoes important  
45  
46 135 differentiation during the different stages of lung development.(19) The optimal SpO<sub>2</sub> range  
47  
48 136 to prevent pulmonary vascular disease may be different from the range to improve pulmonary  
49  
50 137 vascular disease. Therefore, infants with established BPD after 36 weeks PMA may require  
51  
52 138 another approach to oxygen treatment than infants with developing BPD before 36 weeks  
53  
54 139 PMA.  
55  
56  
57  
58  
59  
60

140

141 In summary, there is a lack of evidence on the optimal SpO<sub>2</sub> levels in infants with established  
142 BPD from 36 weeks PMA onwards to optimize respiratory health. Therefore, the aim of this  
143 study is to compare a higher SpO<sub>2</sub> (i.e. 95% lower limit) to a lower SpO<sub>2</sub> (i.e. 90% lower  
144 limit) in infants with moderate or severe BPD from 36 weeks PMA and onwards. Our  
145 hypothesis is that a higher SpO<sub>2</sub> target in infants with established moderate or severe BPD,  
146 improves weight gain and lung growth.

147

## 148 **OBJECTIVES**

149 The primary objective is to investigate whether a higher SpO<sub>2</sub> (i.e. 95% lower limit) leads to a  
150 higher weight at 6 months corrected age, as a surrogate for lung growth. Secondary objectives  
151 are to determine if a higher SpO<sub>2</sub> translates into higher weight and height at 12 months  
152 corrected age, less healthcare consumption, less infant stress, better quality of life for parents  
153 or caregivers and more favourable cost-effectiveness.

154

## 155 **METHODS AND ANALYSIS**

### 156 **Study design and setting**

157 The SOS BPD study is an open, randomised controlled trial and will be conducted in the  
158 Netherlands in approximately (but not limited to) 30 hospitals. In the Netherlands, the care  
159 for extremely preterm born infants is concentrated in 9 hospital clusters. Each cluster consists  
160 of one or two level 3 Neonatal Intensive Care Units (NICU) and several post-intensive  
161 care/high care (post-IC/HC) units in surrounding level 2 centres. The participating hospitals  
162 include 10 NICU centres and 20 post-IC/HC units. A list of recruiting sites is provided in  
163 online supplemental file 1. The SOS BPD study is conducted within the Neonatology  
164 Network Netherlands (N3) organization.(20)

1  
2  
3 165 The protocol for this trial is reported based on the Standard Protocol Items:  
4  
5 166 Recommendations for Interventional Trials (SPIRIT) 2013 Checklist(21) (online  
6  
7 167 supplemental file 2: SPIRIT Checklist).  
8  
9

10 168

11  
12 169 **Study population**

13  
14 170 Infants with moderate or severe BPD, born before 32 weeks of gestation, who still receive  
15  
16 171 respiratory support at 36 weeks PMA are eligible for inclusion. BPD is defined as the use of  
17  
18 172 supplemental oxygen (i.e. >21% oxygen) for  $\geq 28$  days since birth.(22) Depending on the  
19  
20 173 level of respiratory support at 36 weeks PMA, BPD severity is classified as mild, moderate or  
21  
22 174 severe (Table 2). An oxygen reduction test will be used to assess severity if indicated.(23)  
23  
24  
25

26 175

27  
28 176 **Table 2. BPD diagnostic criteria for infants born <32 weeks PMA. Severity is classified**  
29  
30 177 **at 36 weeks PMA.(22)**  
31  
32

| Definition of BPD                                     | Severity classification                                                            |                                    |                                                                                                            |
|-------------------------------------------------------|------------------------------------------------------------------------------------|------------------------------------|------------------------------------------------------------------------------------------------------------|
|                                                       | Mild                                                                               | Moderate                           | Severe                                                                                                     |
| Treatment with supplemental oxygen for $\geq 28$ days | Breathing room air or nasal cannula with $\leq 1$ L flow, $\text{FiO}_2 \leq 21\%$ | Supplemental oxygen >21%, but <30% | Supplemental oxygen $\geq 30\%$ , or invasive or noninvasive positive pressure ventilation, including HFNC |

33  
34  
35  
36  
37  
38  
39  
40  
41  
42  
43  
44  
45  
46  
47  
48  
49  
50  
51 178 BPD = bronchopulmonary dysplasia,  $\text{FiO}_2$  = fraction of inspired oxygen; HFNC = High Flow

52  
53 179 Nasal Cannula; L = liter; PMA = postmenstrual age  
54  
55

56 180  
57  
58  
59  
60

1  
2  
3 181 Written informed consent will be obtained from parents or legal guardians by the local PI of  
4  
5 182 the hospital where the participant is admitted between 36 to 38 weeks PMA (online  
6  
7 183 supplemental file 3: English version of the patient information and informed consent  
8  
9 184 document). Exclusion criteria are significant congenital heart disease (not being patent ductus  
10  
11 185 arteriosus, small atrial septal defect, ventricular septal defect), pulmonary hypertension with  
12  
13 186 medical treatment, retinopathy of prematurity for which the ophthalmologist recommends a  
14  
15 187 patient specific SpO<sub>2</sub> target, severe acquired upper airway abnormalities, such as subglottic  
16  
17 188 stenosis and interstitial lung diseases.  
18  
19  
20  
21  
22  
23

189

## 190 **Randomisation**

24  
25  
26 191 Participants will be randomised 1:1 between 36 and 38 weeks postmenstrual age, to one of  
27  
28 192 two parallel treatment arms: weaning of supplemental oxygen and respiratory support based  
29  
30 193 on an SpO<sub>2</sub> lower limit of 95% or weaning based on a lower limit of 90%.  
31  
32  
33 194 For the randomisation procedure, an electronic data capture system that uses a computer-  
34  
35 195 generated randomisation list (Castor EDC) will be used.(24) We will use block  
36  
37 196 randomisation, with a variable block size (4 – 8). Allocation will be stratified by NICU centre  
38  
39 197 (10 centres) and BPD severity (moderate or severe). In case of multiple birth, the firstborn  
40  
41 198 infant will be randomised according to standard procedures. Siblings will be manually  
42  
43 199 assigned to the same treatment arm as the firstborn infant.  
44  
45

46  
47 200 Enrolment, registration and electronic randomisation in Castor EDC will be carried out by the  
48  
49 201 local PI of the hospital where the participant is included.  
50

51 202 This is a non-blinded study, since it is not feasible to blind treating physicians and parents for  
52  
53 203 SpO<sub>2</sub> values as measured with pulse oximetry in the hospital or at home.  
54  
55

204

## 205 **Study procedures**

1  
2  
3 206 After randomisation, participants are assigned to one of the 2 treatment arms. A lower limit  
4  
5 207 of 95% was chosen for the first group, as the median SpO<sub>2</sub> in preterm infants without BPD is  
6  
7 208 > 95% (25) and SpO<sub>2</sub> >94% reduces the incidence of pulmonary hypertension.(9) Also, with  
9  
10 209 a lower limit of 95% there is a clear contrast between the 2 groups. A lower limit of 90% was  
11  
12 210 chosen for the second group, since this lower limit is advised in the BPD guideline of the  
13  
14 211 European Respiratory Society and SpO<sub>2</sub> values < 90% have been associated with adverse  
16  
17 212 outcomes.(11, 17)  
18  
19 213 During hospitalization, respiratory support and oxygen supplementation will be adjusted  
20  
21 214 based on the assigned lower limit of SpO<sub>2</sub>, as part of daily clinical care. Twice a week, SpO<sub>2</sub>  
22  
23 215 data will be logged from pulse oximeters and stored on a USB stick. Logging frequency  
24  
25 216 differs from 0.25 to 1 Hertz, depending on the type of pulse oximeter that was used in the  
26  
27 217 respective hospitals. All data downloaded from a pulse oximeter is anonymous, since no  
28  
29 218 patient characteristics are saved on it. Downloaded data will be pseudonymised with a study  
30  
31 219 and patient specific number by the local researcher who logged the data. Pseudonymised  
32  
33 220 SpO<sub>2</sub> data will be sent to the research team using encrypted file transfer. Based on the  
34  
35 221 recorded SpO<sub>2</sub> data and group assignment, the medical team will receive advice to actively  
36  
37 222 wean or increase supplemental oxygen.  
38  
39 223 In case participants are discharged on home oxygen, SpO<sub>2</sub> data will be logged from a pulse  
40  
41 224 oximeter at home by the parents once weekly and will be sent to the research team through  
42  
43 225 encrypted file transfer. Feedback and advice to adjust supplemental oxygen will be given to  
44  
45 226 the parents and treating physician.  
46  
47 227 SpO<sub>2</sub> profiles will be obtained until one week after discontinuation of respiratory support.  
48  
49 228 If an infant is readmitted to hospital while still on supplemental oxygen, the assigned SpO<sub>2</sub>  
50  
51 229 lower limit will be kept. If infants are readmitted after they were weaned from supplemental  
52  
53  
54  
55  
56  
57  
58  
59  
60

230 oxygen for at least two weeks, the lower SpO<sub>2</sub> limit will be set according to the local hospital  
231 policy.

232 In order to follow routine clinical care as much as possible, physicians will wean  
233 supplemental oxygen according to their local hospital protocol. If no such protocol is  
234 available, a study specific standard operating procedure will give recommendations on  
235 weaning supplemental oxygen (online supplemental file 4).

236 In order to improve feasibility and generalizability, the use of diuretics, inhaled or oral  
237 corticosteroids, other medications, fluid restriction and feedings will be according to national  
238 guidelines or local policies. Data on these parameters will be collected during the study.

239

#### 240 **Interpretation of SpO<sub>2</sub> profiles**

241 If the time spent below the assigned lower limit of SpO<sub>2</sub> is  $\geq 10\%$  of the recorded time  
242 (equivalent to  $< 90\%$  of the time spent above the lower limit), the treating team is advised to  
243 increase supplemental oxygen and/or respiratory support. When the SpO<sub>2</sub> is below the  
244 assigned lower limit for  $\leq 10\%$  of the time (equivalent to  $> 90\%$  of the time spent above the  
245 lower limit), the treating team is advised to wean supplemental oxygen and/or respiratory  
246 support.

247 The British Thoracic Society Guideline for home oxygen in children suggests that the lower  
248 limit target SpO<sub>2</sub> should be met for at least 95% of a stable recording period.<sup>(9)</sup> However,  
249 this does not take into account that a 24-hour SpO<sub>2</sub> profile is prone to artefacts due to periods  
250 of feeding, physical activity and external manipulation of the saturation probe. Furthermore,  
251 Terrill et al. studied normative oximetry data in extreme preterm infants at term equivalent  
252 age and reported mean saturations of 96.1% (95.4–96.8%) with 7.56% (5.1–10.0%) of the  
253 measuring time spent below an SpO<sub>2</sub> of 90%.<sup>(26, 27)</sup> Therefore, we chose this limit of 10%  
254 below the assigned SpO<sub>2</sub> to adjust oxygen supplementation.

1  
2  
3 255 Temporary deviation of the protocol is possible if this is deemed necessary for medical  
4  
5 256 reasons according to the treating physician. Reasons for these protocol deviations have to be  
6  
7 257 reported to the research team.  
8  
9

10 258

11  
12 259 **Follow-up**

13  
14 260 The study duration will be 12 months, with two follow-up visits at 6 and 12 months corrected  
15  
16 261 age. These follow-up visits follow the national neonatal follow-up program; no extra study  
17  
18 262 visits are required.(28) Data that will be obtained during study visits are weight, height, head  
19  
20 263 circumference, caloric intake, use of medication, respiratory complaints, number of health  
21  
22 264 care visits and hospitalizations.  
23

24  
25 265 In a subgroup of patients, additional investigations including chest CT scan (assessed with  
26  
27 266 PRAGMA-BPD scores),(29) multiple breath washout tests (Lung Clearance Index),  
28  
29 267 polysomnography (baseline SpO<sub>2</sub>, oxygen desaturation index, apnea-hypopnea index) and/or  
30  
31 268 an echocardiogram will be performed, as part of routine care in some hospitals during follow-  
32  
33 269 up at six months corrected age.  
34  
35

36 270

37  
38 271 Parents will receive monthly online questionnaires that address the health situation of their  
39  
40 272 child in the past month and also contain questions used for cost-effectiveness analyses. In  
41  
42 273 addition, parents will be asked to fill in the Dutch version of the Care-Related Quality of Life  
43  
44 274 instrument (CarerQoL-7D). The CarerQoL is designed to measure and value the impact of  
45  
46 275 providing informal care on caregivers.(30)  
47  
48

49  
50 276 At the start of the study and at the corrected age of 6 and 12 months, parents will also be  
51  
52 277 asked to fill in the Dutch version of the Infant Behavior Questionnaire – Revised (IBQ-R)

53  
54 278 Very Short Form.(31) The IBQ-R is designed to measure the temperament of infants between  
55  
56 279 3 and 12 months.  
57  
58  
59  
60



280

**281 Outcomes**

282 The primary outcome of the study is weight standard deviation score (SDS) at 6 months  
283 corrected age as a surrogate for lung growth. Increased weight and weight gain during  
284 infancy are associated with better lung function and structure.(32, 33) Appropriate growth is  
285 also an important measure of general well-being in infancy, whilst growth delay is associated  
286 with an increased risk of future respiratory and cardiovascular disease and impaired  
287 intellectual outcomes.(34, 35) Growth failure is very common in infants with BPD. The exact  
288 underlying mechanisms are unknown, but increased respiratory demands and periods of  
289 intermittent hypoxia probably play an important role.(27) Secondary outcomes are weight  
290 SDS at 12 months corrected age, height and head circumference SDS at 6 and 12 months  
291 corrected age, rate of re-hospitalisations, respiratory symptoms (including wheezing,  
292 dyspnea, exercise induced symptoms), unscheduled health care visits, (progression of)  
293 retinopathy of prematurity (ROP), infant temperament (IBQ-r), quality of life of caregivers  
294 (CarerQoL) and cost-effectiveness.

295 In a subgroup of infants, additional secondary outcomes are lung function (lung clearance  
296 index), lung structure as assessed with chest CT scan, and pulmonary hypertension and/or  
297 right ventricular systolic function as assessed with echocardiography at the corrected age of 6  
298 months. These examinations are part of the standard of care protocol in some of the  
299 outpatient follow-up programs in the Netherlands.

300

**301 Data collection and management**

302 For data management Castor EDC will be used: a password protected, electronic database.  
303 Baseline characteristics including gestational age, birth weight, gender, pregnancy  
304 complications such as pre-eclampsia, past illnesses and retinopathy of prematurity will be



1  
2  
3 305 recorded in the database at inclusion by the local research team. SpO<sub>2</sub> data will be entered  
4  
5 306 into the database by the central research team. Data from follow-up visits will be entered by  
6  
7 307 the research team of the responsible NICU, as outpatient follow-up takes place in those  
8  
9 308 centres. In case of missing data, every attempt will be undertaken to retrieve the data by  
10  
11 309 contacting the respective hospitals.

12  
13  
14 310 Collected data will be pseudonymised and coded with a unique number, complying with the  
15  
16 311 European General Data Protection Regulation. The key to link participants with their data  
17  
18 312 will only be accessible to the local PI of the centre of inclusion and PI of the associated  
19  
20 313 NICU. Data will be stored securely and will be saved for 15 years according to national  
21  
22 314 legislation. Only central study investigators will have access to all collected data.  
23  
24  
25

26 315

### 27 28 316 **Patient and public involvement**

29  
30 317 Parents of children with BPD and several patient associations (Lung Foundation Netherlands,  
31  
32 318 European Lung Foundation and the Neonatal Parents Organization (Care4Neo)) were  
33  
34 319 involved in the development of the trial. In addition, parents of preterm born infants are part  
35  
36 320 of the Advisory Board of the trial. They provide their experience in improving patient  
37  
38 321 information material, publications and presentations for layman and will help with  
39  
40 322 implementation after finalization of the study.  
41  
42  
43  
44

45 323

### 46 47 324 **Sample size estimation**

48  
49 325 A simulation study with four scenarios was performed to estimate the sample size needed  
50  
51 326 with weight SDS at 6 months corrected age as primary outcome. We assumed a mixed effects  
52  
53 327 model with a random intercept to account for the correlation between the patients from the  
54  
55 328 same hospital. We assumed 10 clusters (10 NICU centres with post IC/HC departments in the  
56  
57  
58  
59  
60

1  
2  
3 329 surrounding regional hospitals) with each cluster having 16 ( $\pm 3$ ) or 18 ( $\pm 3$ ) patients. The  
4  
5 330 mean weight at 6 months for the group with a lower saturation limit of 90% was assumed  
6  
7 331 -1.15 SD (data from BPD cohort Erasmus MC, Rotterdam, the Netherlands, data on file). The  
8  
9 332 mean weight at 6 months for the group with a lower saturation limit of 95% was assumed  
10  
11 333 -0.65 SD, since a 0.5 SDS higher weight was considered clinically relevant. The variation in  
12  
13 334 weight due to differences between individuals was assumed 1.18 SD, while the variation in  
14  
15 335 weight due to differences between hospitals was assumed 0.10 and 0.20 SD. The scenario  
16  
17 336 with the highest power (0.83) and greatest variation of weight between the various hospital  
18  
19 337 clusters (0.20 SD) was chosen. This scenario leads to a sample size of 180 patients.  
20  
21  
22 338 Accounting for a drop-out rate of 10%, we aim to include 198 infants.  
23  
24  
25  
26 339

#### 27 28 340 **Statistical analysis**

29  
30 341 Analyses will be performed on an intention-to-treat (ITT) basis. The ITT population will  
31  
32 342 include all randomised infants, regardless of protocol deviations.  
33  
34 343 Comparison between the two groups for the primary endpoint will be made using a mixed  
35  
36 344 effect model with a random intercept to account for the correlation between patients from the  
37  
38 345 same hospital cluster. All secondary parameters will be assessed by linear mixed effect  
39  
40 346 models for continuous outcomes or logistic mixed effect models for binary outcomes. BPD  
41  
42 347 severity and weight at inclusion are considered relevant variables for the outcome weight  
43  
44 348 SDS at 6 months. For the secondary analysis, these variables will be included in the mixed  
45  
46 349 model analysis as fixed effects. Significance levels will be 0.05.  
47  
48  
49 350 Missing values in the baseline covariates, if  $>10\%$ , will be assumed to be missing at random  
50  
51 351 and multiple imputations will be used. We do expect less than 10% missing data for the  
52  
53 352 primary endpoint, weight SDS.  
54  
55  
56 353 All analyses will be completed with the statistical software package R ([www.rproject.org](http://www.rproject.org)),  
57  
58  
59  
60

1  
2  
3 354 and SPSS/PC Statistics 21.0 (SPSS Inc., Chicago, IL, USA).  
4  
5

6 355  
7

### 8 356 **Cost-effectiveness analysis**

9  
10 357 A trial-based economic evaluation will be used as a cost-effectiveness analysis performed

11  
12 358 from a societal perspective as well as from a healthcare perspective. The initial time horizon

13  
14 359 is one year. Costs will be calculated based on patient-level data on resource use inside and

15  
16 360 outside the healthcare sector during the first year of life of the infant. If an oxygen weaning

17  
18 361 strategy leads to better health outcomes at higher costs, incremental cost-effectiveness ratios

19  
20 362 will be calculated. Depending on which treatment is more effective, these ratios will express

21  
22 363 the additional costs per unit of health gain or the savings per unit of health forgone.

23  
24 364 Although it is very plausible that health effects and differences in costs persist or occur later in

25  
26 365 life, currently available data and literature do not allow a meaningful extrapolation after the

27  
28 366 study period. Nevertheless, the children will be followed until the age of 8 year, outside of the

29  
30 367 scope of this initial study, according to national follow-up guidelines for preterm born children.

31  
32 368 This will make it possible to track costs and effects in the longer term.

33  
34 369

## 35 36 370 **ETHICS AND DISSEMINATION**

### 37 38 371 **Ethical consideration**

39  
40 372 Ethical approval for the trial has been obtained from the Medical Ethics Review Committee

41  
42 373 of the Erasmus University Medical Center, Rotterdam, the Netherlands (MEC-2018-1515).

43  
44 374 Local approval for conducting the trial in the participating hospitals has been, or will be

45  
46 375 obtained from the local institutional review boards. Written informed consent will be

47  
48 376 obtained from the parents or legal guardians of all study participants, adhering the Good

49  
50 377 Clinical Practice guideline.(36)

51  
52 378 Protocol modifications will be communicated to all relevant parties.  
53  
54  
55  
56  
57  
58  
59  
60

1  
2  
3 3794  
5 380 **Safety reporting and auditing**

6  
7 381 All serious adverse events (SAE) will be reported to the approving ethics committee in  
8  
9 382 accordance with national guidelines. SAEs will be collected and recorded from informed  
10  
11 383 consent signature to two weeks after stopping supplemental oxygen. After this period until  
12  
13 384 the last follow-up visit at 12 months corrected age, only intensive care admissions for  
14  
15 385 complicated respiratory tract infections and death will be considered SAEs and will be  
16  
17 386 reported as such.  
18  
19  
20

21 387

22  
23 388 All participating sites will be audited by an independent study monitor. For frequency and  
24  
25 389 procedures, see online supplemental file 5.  
26  
27

28 390

29  
30 391 **Data and Safety Monitoring Board**

31  
32 392 A Data and Safety Monitoring Board (DSMB) is installed. Although this study does not add  
33  
34 393 extra risks to the safety of the patients, the DSMB is installed because of the vulnerability of  
35  
36 394 the population and complicated logistics of a multicentre trial. The DSMB will monitor the  
37  
38 395 safety, validity and credibility of the trial in order to protect the patients, but not futility. In  
39  
40 396 principle, the trial will not be stopped early for a beneficial effect on the primary outcome.  
41  
42 397 Safety analyses will be performed when approximately 25%, 50% and 75% of patients have  
43  
44 398 reached the end of the follow-up (12 months corrected age). The safety data analysis will  
45  
46 399 include retinopathy of prematurity and serious adverse events. The DSMB is independent  
47  
48 400 from the sponsor; the committee members have declared no competing interests.  
49  
50

51 401

52  
53 402 **Dissemination**  
54  
55  
56  
57  
58  
59  
60

1  
2  
3 403 Results of the trial will be published in open-access journals. After ending of the trial and  
4  
5 404 publication of results, the data collection of this trial will be available for sharing under  
6  
7 405 conditions, through a secured, online portal (DANS).(37)  
8  
9

10 406

11  
12 407 **Trial status**

13  
14 408 Patient inclusion was started in January 2020, but was temporarily paused due to regulations  
15  
16 409 during the Corona virus pandemic (COVID-19). Inclusion restarted in August 2020.  
17  
18

19 410 **Statements**

20  
21 411 **Contributors:** MP, AvK, WO, DN, EV, PD, AB, AK, IR and SB constitute the trial steering  
22  
23 412 committee. MP, AvK, WO, DN, EV, PD, AB, AK and IR designed the trial and will provide  
24  
25 413 clinical expertise in the conduct of the trial; MP is the Chief Investigator and has overall  
26  
27 414 leadership of the trial; DN is partly responsible for logistical coordination of the trial; SB is  
28  
29 415 responsible for overall coordination of the trial and management of the clinical data. AH and  
30  
31 416 AS constitute the Advisory Board and provide clinical expertise in the conduct of the trial.  
32  
33 417 LG is responsible for cost-effectiveness analyses. EA is the trial statistician. The SOS BPD  
34  
35 418 study group consists of all local investigators in the participating hospitals who are  
36  
37 419 responsible for patient recruitment and data collection.  
38  
39

40  
41 420 SB wrote the first draft version of the manuscript; all authors, including the study group,  
42  
43 421 reviewed draft versions and approved the final manuscript as submitted and agreed to be  
44  
45 422 accountable for all aspects of the work.  
46  
47

48  
49 423 **Collaborators:** the SOS BPD study group: M.G.A. Baartmans, G.J. Blok, W.P. de Boode,  
50  
51 424 H.D. Buiters, C.E. Counsilman, C.A. Dalen Meurs, A.C.M. Dassel, A.M. de Grauw, M.E.N.  
52  
53 425 van den Heuvel, J.L.A.M. van Hillegersberg, J.C.R. van Hoften, J.H.L. van Hoorn, C.H. ten  
54  
55 426 Hove, M. de Jong, A. Kamerbeek, A.A.M.W. van Kempen, J.S. von Lindern, L.H. van der  
56  
57  
58  
59  
60

427 Meer, R.M.J. Moonen, E.E.M. Mulder, H.J. Niemarkt, L.G.M. van Rooij, M.A.G. van

428 Scherpenzeel-de Vries, I.A.M. Schiering, R.N.G.B. Tan, E. Villamor.

429 **Funding:** This work was supported by the Lung Foundation Netherlands under grant number

430 4.1.17.162 and by Netherlands Organisation for Health Research and Development

431 (ZonMW) – Efficiency Studies Program under grant number 843002827. The study funders

432 were not involved in the design of the trial, and are not involved in data collection, analysis

433 and interpretation of data.

434 **Competing interests:** none declared

435 **Patient consent for publication:** Not required

436 **Provenance and peer review:** Not commissioned; externally reviewed for funding and

437 ethical approval prior to submission.

438

## 439 REFERENCES

440 1. Thebaud B, Goss KN, Laughon M, Whitsett JA, Abman SH, Steinhorn RH, et al.

441 Bronchopulmonary dysplasia. *Nat Rev Dis Primers*. 2019;5(1):78.

442 2. Bhandari A, Bhandari V. Pathogenesis, pathology and pathophysiology of pulmonary

443 sequelae of bronchopulmonary dysplasia in premature infants. *Front Biosci*. 2003;8:e370-80.

444 3. Stoll BJ, Hansen NI, Bell EF, Walsh MC, Carlo WA, Shankaran S, et al. Trends in Care

445 Practices, Morbidity, and Mortality of Extremely Preterm Neonates, 1993-2012. *Jama*.

446 2015;314(10):1039-51.

447 4. Simpson SJ, Turkovic L, Wilson AC, Verheggen M, Logie KM, Pillow JJ, et al. Lung

448 function trajectories throughout childhood in survivors of very preterm birth: a longitudinal

449 cohort study. *Lancet Child Adolesc Health*. 2018;2(5):350-9.

- 1  
2  
3 450 5. Gough A, Linden M, Spence D, Patterson CC, Halliday HL, McGarvey LP. Impaired lung  
4  
5 451 function and health status in adult survivors of bronchopulmonary dysplasia. *Eur Respir J*.  
6  
7 452 2014;43(3):808-16.  
8  
9  
10 453 6. Smith VC, Zupancic JA, McCormick MC, Croen LA, Greene J, Escobar GJ, et al.  
11  
12 454 Rehospitalization in the first year of life among infants with bronchopulmonary dysplasia. *J*  
13  
14 455 *Pediatr*. 2004;144(6):799-803.  
15  
16  
17 456 7. Pramana IA, Latzin P, Schlapbach LJ, Hafen G, Kuehni CE, Nelle M, et al. Respiratory  
18  
19 457 symptoms in preterm infants: burden of disease in the first year of life. *Eur J Med Res*.  
20  
21 458 2011;16(5):223-30.  
22  
23  
24 459 8. McGrath-Morrow SA, Ryan T, Riekert K, Lefton-Greif MA, Eakin M, Collaco JM. The  
25  
26 460 impact of bronchopulmonary dysplasia on caregiver health related quality of life during the  
27  
28 461 first 2 years of life. *Pediatr Pulmonol*. 2013;48(6):579-86.  
29  
30  
31 462 9. Balfour-Lynn IM, Field DJ, Gringras P, Hicks B, Jardine E, Jones RC, et al. BTS  
32  
33 463 guidelines for home oxygen in children. *Thorax*. 2009;64 Suppl 2:ii1-26.  
34  
35  
36 464 10. Martin DS, Grocott MP. Oxygen therapy in critical illness: precise control of arterial  
37  
38 465 oxygenation and permissive hypoxemia. *Crit Care Med*. 2013;41(2):423-32.  
39  
40 466 11. Duijts L, van Meel ER, Moschino L, Baraldi E, Barnhoorn M, Bramer WM, et al.  
41  
42 467 European Respiratory Society guideline on long term management of children with  
43  
44 468 bronchopulmonary dysplasia. *Eur Respir J*. 2019.  
45  
46  
47 469 12. Hayes D, Jr., Wilson KC, Krivchenia K, Hawkins SMM, Balfour-Lynn IM, Gozal D, et  
48  
49 470 al. Home Oxygen Therapy for Children. An Official American Thoracic Society Clinical  
50  
51 471 Practice Guideline. *Am J Respir Crit Care Med*. 2019;199(3):e5-e23.  
52  
53  
54 472 13. Supplemental Therapeutic Oxygen for Prethreshold Retinopathy Of Prematurity (STOP-  
55  
56 473 ROP), a randomized, controlled trial. I: primary outcomes. *Pediatrics*. 2000;105(2):295-310.  
57  
58  
59  
60



- 1  
2  
3 474 14. Askie LM, Henderson-Smart DJ, Irwig L, Simpson JM. Oxygen-Saturation Targets and  
4  
5 475 Outcomes in Extremely Preterm Infants. *New England Journal of Medicine*.  
6  
7 476 2003;349(10):959-67.  
8  
9  
10 477 15. Askie LM, Darlow BA, Davis PG, Finer N, Stenson B, Vento M, et al. Effects of  
11  
12 478 targeting lower versus higher arterial oxygen saturations on death or disability in preterm  
13  
14 479 infants. *Cochrane Database Syst Rev*. 2017;4:CD011190.  
15  
16  
17 480 16. Saugstad OD, Aune D. Optimal oxygenation of extremely low birth weight infants: a  
18  
19 481 meta-analysis and systematic review of the oxygen saturation target studies. *Neonatology*.  
20  
21 482 2014;105(1):55-63.  
22  
23  
24 483 17. Cummings JJ, Polin RA, Committee On F, Newborn. Oxygen Targeting in Extremely  
25  
26 484 Low Birth Weight Infants. *Pediatrics*. 2016;138(2).  
27  
28  
29 485 18. Schittny JC, Burri PH, editors. *Development and growth of the lung*. 2007.  
30  
31 486 19. de Wijs-Meijler DP, Duncker DJ, Tibboel D, Schermuly RT, Weissmann N, Merkus D, et  
32  
33 487 al. Oxidative injury of the pulmonary circulation in the perinatal period: Short- and long-term  
34  
35 488 consequences for the human cardiopulmonary system. *Pulm Circ*. 2017;7(1):55-66.  
36  
37  
38 489 20. Neonatology Network Netherlands (N3). Neonatology Network Netherlands [Available  
39  
40 490 from: <http://www.neonatology.eu/>.  
41  
42 491 21. Chan AW, Tetzlaff JM, Gøtzsche PC, Altman DG, Mann H, Berlin JA, et al. SPIRIT  
43  
44 492 2013 explanation and elaboration: guidance for protocols of clinical trials. *BMJ*.  
45  
46 493 2013;346:e7586.  
47  
48  
49 494 22. Dutch Association of Pediatrics - Bronchopulmonary Dysplasia Working Group.  
50  
51 495 Guideline Bronchopulmonary Dysplasia. December 2013.  
52  
53  
54 496 23. Walsh MC, Wilson-Costello D, Zadell A, Newman N, Fanaroff A. Safety, reliability, and  
55  
56 497 validity of a physiologic definition of bronchopulmonary dysplasia. *J Perinatol*.  
57  
58 498 2003;23(6):451-6.  
59  
60



- 1  
2  
3 499 24. Castor EDC. Castor Electronic Data Capture. 2019(August 28, 2019).  
4  
5 500 25. Rath C, Kluckow M. Oxygen saturation profile of term equivalent extreme preterm  
6  
7 501 infants at discharge - comparison with healthy term counterparts. *Acta Paediatr.*  
8  
9 502 2016;105(3):e94-8.  
10  
11 503 26. Terrill PI, Dakin C, Edwards BA, Wilson SJ, MacLean JE. A graphical method for  
12  
13 504 comparing nocturnal oxygen saturation profiles in individuals and populations: Application to  
14  
15 505 healthy infants and preterm neonates. *Pediatr Pulmonol.* 2018;53(5):645-55.  
16  
17 506 27. Everitt LH, Awoseyila A, Bhatt JM, Johnson MJ, Vollmer B, Evans HJ. Weaning oxygen  
18  
19 507 in infants with bronchopulmonary dysplasia. *Paediatr Respir Rev.* 2020.  
20  
21 508 28. Dutch Association of Pediatrics - National Neonatal Follow-up Work Group.  
22  
23 509 Recommendation National Neonatal Follow-up - NICU follow-up. January 2015.  
24  
25 510 29. van Mastriegt E, Logie K, Ciet P, Reiss IK, Duijts L, Pijnenburg MW, et al. Lung CT  
26  
27 511 imaging in patients with bronchopulmonary dysplasia: A systematic review. *Pediatr*  
28  
29 512 *Pulmonol.* 2016;51(9):975-86.  
30  
31 513 30. Brouwer WB, van Exel NJ, van Gorp B, Redekop WK. The CarerQol instrument: a new  
32  
33 514 instrument to measure care-related quality of life of informal caregivers for use in economic  
34  
35 515 evaluations. *Qual Life Res.* 2006;15(6):1005-21.  
36  
37 516 31. Putnam SP, Helbig AL, Gartstein MA, Rothbart MK, Leerkes E. Development and  
38  
39 517 assessment of short and very short forms of the infant behavior questionnaire-revised. *J Pers*  
40  
41 518 *Assess.* 2014;96(4):445-58.  
42  
43 519 32. Sanchez-Solis M, Perez-Fernandez V, Bosch-Gimenez V, Quesada JJ, Garcia-Marcos L.  
44  
45 520 Lung function gain in preterm infants with and without bronchopulmonary dysplasia. *Pediatr*  
46  
47 521 *Pulmonol.* 2016;51(9):936-42.  
48  
49  
50  
51  
52  
53  
54  
55  
56  
57  
58  
59  
60

- 1  
2  
3 522 33. van Mastrigt E, Kakar E, Ciet P, den Dekker HT, Joosten KF, Kalkman P, et al. Structural  
4  
5 523 and functional ventilatory impairment in infants with severe bronchopulmonary dysplasia.  
6  
7 524 *Pediatr Pulmonol.* 2017;52(8):1029-37.
- 8  
9  
10 525 34. DeBoer MD, Lima AA, Oria RB, Scharf RJ, Moore SR, Luna MA, et al. Early childhood  
11  
12 526 growth failure and the developmental origins of adult disease: do enteric infections and  
13  
14 527 malnutrition increase risk for the metabolic syndrome? *Nutr Rev.* 2012;70(11):642-53.
- 15  
16  
17 528 35. Wang LY, Luo HJ, Hsieh WS, Hsu CH, Hsu HC, Chen PS, et al. Severity of  
18  
19 529 bronchopulmonary dysplasia and increased risk of feeding desaturation and growth delay in  
20  
21 530 very low birth weight preterm infants. *Pediatr Pulmonol.* 2010;45(2):165-73.
- 22  
23  
24 531 36. Good Clinical Practice Network. Guideline for Good Clinical Practice ICH E6(R2) ICH  
25  
26 532 Consensus Guideline [Available from: <https://ichgcp.net/>].
- 27  
28 533 37. Data Archiving and Networking Services (DANS). Dutch National Centre of Expertise  
29  
30 534 and Repository for Research Data [Available from: <https://dans.knaw.nl/en>].

31  
32  
33 535  
34  
35  
36  
37  
38  
39  
40  
41  
42  
43  
44  
45  
46  
47  
48  
49  
50  
51  
52  
53  
54  
55  
56  
57  
58  
59  
60

### List of participating hospitals in the SOS BPD trial

All sites, participating in the SOS BPD trial, at the time of submission of the trial protocol:

| Hospital                                                      | Location   | Local principal investigator       |
|---------------------------------------------------------------|------------|------------------------------------|
| Albert Schweitzer Hospital                                    | Dordrecht  | M. de Jong                         |
| Amphia Hospital                                               | Breda      | A.R. Hulsmann                      |
| Amsterdam University Medical Centers – Locations AMC and VuMC | Amsterdam  | A.H. van Kaam, W. Onland           |
| Deventer Hospital                                             | Deventer   | A.C.M. Dassel                      |
| Elisabeth-Tweesteden Hospital                                 | Tilburg    | J.C.R. van Hoften                  |
| Erasmus MC – Sophia Children's Hospital                       | Rotterdam  | M.W.H. Pijnenburg, A.A. Kroon      |
| Flevo Hospital                                                | Almere     | C.E. Counsilman                    |
| Franciscus Gasthuis & Vlietland                               | Rotterdam  | A. Kamerbeek                       |
| Groene Hart Hospital                                          | Gouda      | J.S. von Lindern                   |
| Haga Hospital                                                 | Den Haag   | A.M. de Grauw                      |
| Isala Women and Children's Hospital                           | Zwolle     | E.E.M. Mulder                      |
| Leiden University Medical Center                              | Leiden     | R.N.G.B. Tan                       |
| Maasstad Hospital                                             | Rotterdam  | M.G.A. Baartmans                   |
| Maastricht University Medical Center                          | Maastricht | E. Villamor                        |
| Martini Hospital                                              | Groningen  | H.D. Buijter                       |
| Maxima Medical Center                                         | Veldhoven  | H.J. Niemarkt                      |
| Meander Medical Center                                        | Amersfoort | C.A. Dalen Meurs                   |
| Medical Center Leeuwarden                                     | Leeuwarden | M.A.G. van Scherpenzeel - de Vries |
| Medisch Spectrum Twente                                       | Enschede   | L.G.M. van Rooij                   |
| Noordwest Hospitalgroup                                       | Alkmaar    | G.J. Blok                          |
| OLVG                                                          | Amsterdam  | A.A.M.W. van Kempen                |
| Radboud University Medical Center                             | Nijmegen   | W.P. de Boode                      |
| Reinier de Graaf Gasthuis                                     | Delft      | L.H. van der Meer                  |
| Rijnstate Hospital                                            | Arnhem     | C.H. ten Hove                      |
| Spaarne Gasthuis                                              | Haarlem    | I.A.M. Schiering                   |
| St. Antonius Hospital                                         | Nieuwegein | J.L.A.M. van Hillegersberg         |
| University Medical Center Groningen                           | Groningen  | P.H. Dijk                          |
| Viecuri Medical Center                                        | Venlo      | J.H.L. van Hoorn                   |
| Zuyderland Medical Center                                     | Heerlen    | R.M.J. Moonen                      |

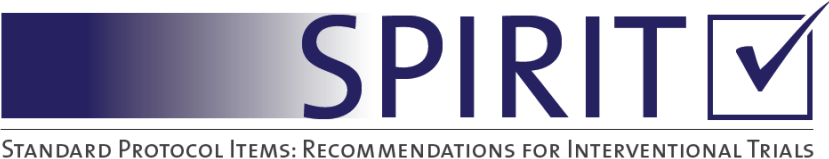

SPIRIT 2013 Checklist: Recommended items to address in a clinical trial protocol and related documents\*

| Section/item                      | Item No | Description                                                                                                                                                                                                                                                                              | Addressed on page number |
|-----------------------------------|---------|------------------------------------------------------------------------------------------------------------------------------------------------------------------------------------------------------------------------------------------------------------------------------------------|--------------------------|
| <b>Administrative information</b> |         |                                                                                                                                                                                                                                                                                          |                          |
| Title                             | 1       | Descriptive title identifying the study design, population, interventions, and, if applicable, trial acronym                                                                                                                                                                             | 1                        |
| Trial registration                | 2a      | Trial identifier and registry name. If not yet registered, name of intended registry                                                                                                                                                                                                     | 3                        |
|                                   | 2b      | All items from the World Health Organization Trial Registration Data Set                                                                                                                                                                                                                 | 3                        |
| Protocol version                  | 3       | Date and version identifier                                                                                                                                                                                                                                                              | 1 – 24                   |
| Funding                           | 4       | Sources and types of financial, material, and other support                                                                                                                                                                                                                              | 23, 24                   |
| Roles and responsibilities        | 5a      | Names, affiliations, and roles of protocol contributors                                                                                                                                                                                                                                  | 1, 23                    |
|                                   | 5b      | Name and contact information for the trial sponsor                                                                                                                                                                                                                                       | 1                        |
|                                   | 5c      | Role of study sponsor and funders, if any, in study design; collection, management, analysis, and interpretation of data; writing of the report; and the decision to submit the report for publication, including whether they will have ultimate authority over any of these activities | 23, 24                   |
|                                   | 5d      | Composition, roles, and responsibilities of the coordinating centre, steering committee, endpoint adjudication committee, data management team, and other individuals or groups overseeing the trial, if applicable (see Item 21a for data monitoring committee)                         | 23                       |

## 1 Introduction

|    |                |    |                                                                                                               |       |
|----|----------------|----|---------------------------------------------------------------------------------------------------------------|-------|
| 2  |                |    |                                                                                                               |       |
| 3  | Background and | 6a | Description of research question and justification for undertaking the trial, including summary of relevant   | 5 - 8 |
| 4  | rationale      |    | studies (published and unpublished) examining benefits and harms for each intervention                        |       |
| 5  |                |    |                                                                                                               |       |
| 6  |                | 6b | Explanation for choice of comparators                                                                         | 11    |
| 7  |                |    |                                                                                                               |       |
| 8  | Objectives     | 7  | Specific objectives or hypotheses                                                                             | 8     |
| 9  |                |    |                                                                                                               |       |
| 10 | Trial design   | 8  | Description of trial design including type of trial (eg, parallel group, crossover, factorial, single group), |       |
| 11 |                |    | allocation ratio, and framework (eg, superiority, equivalence, noninferiority, exploratory)                   | 8     |
| 12 |                |    |                                                                                                               |       |
| 13 |                |    |                                                                                                               |       |

## 14 Methods: Participants, interventions, and outcomes

|    |                      |     |                                                                                                               |         |
|----|----------------------|-----|---------------------------------------------------------------------------------------------------------------|---------|
| 15 |                      |     |                                                                                                               |         |
| 16 | Study setting        | 9   | Description of study settings (eg, community clinic, academic hospital) and list of countries where data will | 8       |
| 17 |                      |     | be collected. Reference to where list of study sites can be obtained                                          |         |
| 18 |                      |     |                                                                                                               |         |
| 19 | Eligibility criteria | 10  | Inclusion and exclusion criteria for participants. If applicable, eligibility criteria for study centres and  | 9 – 10  |
| 20 |                      |     | individuals who will perform the interventions (eg, surgeons, psychotherapists)                               |         |
| 21 |                      |     |                                                                                                               |         |
| 22 | Interventions        | 11a | Interventions for each group with sufficient detail to allow replication, including how and when they will be | 11 – 12 |
| 23 |                      |     | administered                                                                                                  |         |
| 24 |                      | 11b | Criteria for discontinuing or modifying allocated interventions for a given trial participant (eg, drug dose  | 11      |
| 25 |                      |     | change in response to harms, participant request, or improving/worsening disease)                             |         |
| 26 |                      | 11c | Strategies to improve adherence to intervention protocols, and any procedures for monitoring adherence        | 11 – 12 |
| 27 |                      |     | (eg, drug tablet return, laboratory tests)                                                                    |         |
| 28 |                      | 11d | Relevant concomitant care and interventions that are permitted or prohibited during the trial                 | 12      |
| 29 |                      |     |                                                                                                               |         |
| 30 | Outcomes             | 12  | Primary, secondary, and other outcomes, including the specific measurement variable (eg, systolic blood       | 13 – 14 |
| 31 |                      |     | pressure), analysis metric (eg, change from baseline, final value, time to event), method of aggregation (eg, |         |
| 32 |                      |     | median, proportion), and time point for each outcome. Explanation of the clinical relevance of chosen         |         |
| 33 |                      |     | efficacy and harm outcomes is strongly recommended                                                            |         |
| 34 |                      |     |                                                                                                               |         |
| 35 | Participant timeline | 13  | Time schedule of enrolment, interventions (including any run-ins and washouts), assessments, and visits for   | 11 – 13 |
| 36 |                      |     | participants. A schematic diagram is highly recommended (see Figure)                                          |         |
| 37 |                      |     |                                                                                                               |         |
| 38 |                      |     |                                                                                                               |         |
| 39 |                      |     |                                                                                                               |         |

|    |                                                                     |     |                                                                                                                                                                                                                                                                                                                                                                                                              |         |
|----|---------------------------------------------------------------------|-----|--------------------------------------------------------------------------------------------------------------------------------------------------------------------------------------------------------------------------------------------------------------------------------------------------------------------------------------------------------------------------------------------------------------|---------|
| 1  | Sample size                                                         | 14  | Estimated number of participants needed to achieve study objectives and how it was determined, including clinical and statistical assumptions supporting any sample size calculations                                                                                                                                                                                                                        | 15 – 16 |
| 2  |                                                                     |     |                                                                                                                                                                                                                                                                                                                                                                                                              |         |
| 3  |                                                                     |     |                                                                                                                                                                                                                                                                                                                                                                                                              |         |
| 4  | Recruitment                                                         | 15  | Strategies for achieving adequate participant enrolment to reach target sample size                                                                                                                                                                                                                                                                                                                          | 10      |
| 5  |                                                                     |     |                                                                                                                                                                                                                                                                                                                                                                                                              |         |
| 6  |                                                                     |     |                                                                                                                                                                                                                                                                                                                                                                                                              |         |
| 7  | <b>Methods: Assignment of interventions (for controlled trials)</b> |     |                                                                                                                                                                                                                                                                                                                                                                                                              |         |
| 8  | Allocation:                                                         |     |                                                                                                                                                                                                                                                                                                                                                                                                              |         |
| 9  |                                                                     |     |                                                                                                                                                                                                                                                                                                                                                                                                              |         |
| 10 | Sequence                                                            | 16a | Method of generating the allocation sequence (eg, computer-generated random numbers), and list of any factors for stratification. To reduce predictability of a random sequence, details of any planned restriction (eg, blocking) should be provided in a separate document that is unavailable to those who enrol participants or assign interventions                                                     | 10      |
| 11 | generation                                                          |     |                                                                                                                                                                                                                                                                                                                                                                                                              |         |
| 12 |                                                                     |     |                                                                                                                                                                                                                                                                                                                                                                                                              |         |
| 13 |                                                                     |     |                                                                                                                                                                                                                                                                                                                                                                                                              |         |
| 14 |                                                                     |     |                                                                                                                                                                                                                                                                                                                                                                                                              |         |
| 15 |                                                                     |     |                                                                                                                                                                                                                                                                                                                                                                                                              |         |
| 16 | Allocation                                                          | 16b | Mechanism of implementing the allocation sequence (eg, central telephone; sequentially numbered, opaque, sealed envelopes), describing any steps to conceal the sequence until interventions are assigned                                                                                                                                                                                                    | 10      |
| 17 | concealment                                                         |     |                                                                                                                                                                                                                                                                                                                                                                                                              |         |
| 18 | mechanism                                                           |     |                                                                                                                                                                                                                                                                                                                                                                                                              |         |
| 19 |                                                                     |     |                                                                                                                                                                                                                                                                                                                                                                                                              |         |
| 20 | Implementation                                                      | 16c | Who will generate the allocation sequence, who will enrol participants, and who will assign participants to interventions                                                                                                                                                                                                                                                                                    | 10      |
| 21 |                                                                     |     |                                                                                                                                                                                                                                                                                                                                                                                                              |         |
| 22 |                                                                     |     |                                                                                                                                                                                                                                                                                                                                                                                                              |         |
| 23 |                                                                     |     |                                                                                                                                                                                                                                                                                                                                                                                                              |         |
| 24 | Blinding (masking)                                                  | 17a | Who will be blinded after assignment to interventions (eg, trial participants, care providers, outcome assessors, data analysts), and how                                                                                                                                                                                                                                                                    | 10      |
| 25 |                                                                     |     |                                                                                                                                                                                                                                                                                                                                                                                                              |         |
| 26 |                                                                     |     |                                                                                                                                                                                                                                                                                                                                                                                                              |         |
| 27 |                                                                     | 17b | If blinded, circumstances under which unblinding is permissible, and procedure for revealing a participant's allocated intervention during the trial                                                                                                                                                                                                                                                         | N / A   |
| 28 |                                                                     |     |                                                                                                                                                                                                                                                                                                                                                                                                              |         |
| 29 |                                                                     |     |                                                                                                                                                                                                                                                                                                                                                                                                              |         |
| 30 |                                                                     |     |                                                                                                                                                                                                                                                                                                                                                                                                              |         |
| 31 | <b>Methods: Data collection, management, and analysis</b>           |     |                                                                                                                                                                                                                                                                                                                                                                                                              |         |
| 32 |                                                                     |     |                                                                                                                                                                                                                                                                                                                                                                                                              |         |
| 33 | Data collection                                                     | 18a | Plans for assessment and collection of outcome, baseline, and other trial data, including any related processes to promote data quality (eg, duplicate measurements, training of assessors) and a description of study instruments (eg, questionnaires, laboratory tests) along with their reliability and validity, if known. Reference to where data collection forms can be found, if not in the protocol | 13 – 15 |
| 34 | methods                                                             |     |                                                                                                                                                                                                                                                                                                                                                                                                              |         |
| 35 |                                                                     |     |                                                                                                                                                                                                                                                                                                                                                                                                              |         |
| 36 |                                                                     |     |                                                                                                                                                                                                                                                                                                                                                                                                              |         |
| 37 |                                                                     |     |                                                                                                                                                                                                                                                                                                                                                                                                              |         |
| 38 |                                                                     |     |                                                                                                                                                                                                                                                                                                                                                                                                              |         |
| 39 |                                                                     | 18b | Plans to promote participant retention and complete follow-up, including list of any outcome data to be collected for participants who discontinue or deviate from intervention protocols                                                                                                                                                                                                                    | 14 – 15 |
| 40 |                                                                     |     |                                                                                                                                                                                                                                                                                                                                                                                                              |         |
| 41 |                                                                     |     |                                                                                                                                                                                                                                                                                                                                                                                                              |         |
| 42 |                                                                     |     |                                                                                                                                                                                                                                                                                                                                                                                                              |         |

|    |                                 |     |                                                                                                                                                                                                                                                                                                                                       |                         |
|----|---------------------------------|-----|---------------------------------------------------------------------------------------------------------------------------------------------------------------------------------------------------------------------------------------------------------------------------------------------------------------------------------------|-------------------------|
| 1  | Data management                 | 19  | Plans for data entry, coding, security, and storage, including any related processes to promote data quality (eg, double data entry; range checks for data values). Reference to where details of data management procedures can be found, if not in the protocol                                                                     | 14 – 15                 |
| 2  |                                 |     |                                                                                                                                                                                                                                                                                                                                       |                         |
| 3  |                                 |     |                                                                                                                                                                                                                                                                                                                                       |                         |
| 4  |                                 |     |                                                                                                                                                                                                                                                                                                                                       |                         |
| 5  | Statistical methods             | 20a | Statistical methods for analysing primary and secondary outcomes. Reference to where other details of the statistical analysis plan can be found, if not in the protocol                                                                                                                                                              | 16 – 17                 |
| 6  |                                 |     |                                                                                                                                                                                                                                                                                                                                       |                         |
| 7  |                                 |     |                                                                                                                                                                                                                                                                                                                                       |                         |
| 8  |                                 | 20b | Methods for any additional analyses (eg, subgroup and adjusted analyses)                                                                                                                                                                                                                                                              | 16 – 17                 |
| 9  |                                 |     |                                                                                                                                                                                                                                                                                                                                       |                         |
| 10 |                                 | 20c | Definition of analysis population relating to protocol non-adherence (eg, as randomised analysis), and any statistical methods to handle missing data (eg, multiple imputation)                                                                                                                                                       | 16                      |
| 11 |                                 |     |                                                                                                                                                                                                                                                                                                                                       |                         |
| 12 |                                 |     |                                                                                                                                                                                                                                                                                                                                       |                         |
| 13 |                                 |     |                                                                                                                                                                                                                                                                                                                                       |                         |
| 14 | <b>Methods: Monitoring</b>      |     |                                                                                                                                                                                                                                                                                                                                       |                         |
| 15 |                                 |     |                                                                                                                                                                                                                                                                                                                                       |                         |
| 16 | Data monitoring                 | 21a | Composition of data monitoring committee (DMC); summary of its role and reporting structure; statement of whether it is independent from the sponsor and competing interests; and reference to where further details about its charter can be found, if not in the protocol. Alternatively, an explanation of why a DMC is not needed | 18                      |
| 17 |                                 |     |                                                                                                                                                                                                                                                                                                                                       |                         |
| 18 |                                 |     |                                                                                                                                                                                                                                                                                                                                       |                         |
| 19 |                                 |     |                                                                                                                                                                                                                                                                                                                                       |                         |
| 20 |                                 |     |                                                                                                                                                                                                                                                                                                                                       |                         |
| 21 |                                 |     |                                                                                                                                                                                                                                                                                                                                       |                         |
| 22 |                                 | 21b | Description of any interim analyses and stopping guidelines, including who will have access to these interim results and make the final decision to terminate the trial                                                                                                                                                               | 18                      |
| 23 |                                 |     |                                                                                                                                                                                                                                                                                                                                       |                         |
| 24 |                                 |     |                                                                                                                                                                                                                                                                                                                                       |                         |
| 25 | Harms                           | 22  | Plans for collecting, assessing, reporting, and managing solicited and spontaneously reported adverse events and other unintended effects of trial interventions or trial conduct                                                                                                                                                     | 17 – 18                 |
| 26 |                                 |     |                                                                                                                                                                                                                                                                                                                                       |                         |
| 27 |                                 |     |                                                                                                                                                                                                                                                                                                                                       |                         |
| 28 | Auditing                        | 23  | Frequency and procedures for auditing trial conduct, if any, and whether the process will be independent from investigators and the sponsor                                                                                                                                                                                           | 18, supplemental file 4 |
| 29 |                                 |     |                                                                                                                                                                                                                                                                                                                                       |                         |
| 30 |                                 |     |                                                                                                                                                                                                                                                                                                                                       |                         |
| 31 |                                 |     |                                                                                                                                                                                                                                                                                                                                       |                         |
| 32 | <b>Ethics and dissemination</b> |     |                                                                                                                                                                                                                                                                                                                                       |                         |
| 33 |                                 |     |                                                                                                                                                                                                                                                                                                                                       |                         |
| 34 | Research ethics approval        | 24  | Plans for seeking research ethics committee/institutional review board (REC/IRB) approval                                                                                                                                                                                                                                             | 17                      |
| 35 |                                 |     |                                                                                                                                                                                                                                                                                                                                       |                         |
| 36 |                                 |     |                                                                                                                                                                                                                                                                                                                                       |                         |
| 37 | Protocol amendments             | 25  | Plans for communicating important protocol modifications (eg, changes to eligibility criteria, outcomes, analyses) to relevant parties (eg, investigators, REC/IRBs, trial participants, trial registries, journals, regulators)                                                                                                      | 17                      |
| 38 |                                 |     |                                                                                                                                                                                                                                                                                                                                       |                         |
| 39 |                                 |     |                                                                                                                                                                                                                                                                                                                                       |                         |
| 40 |                                 |     |                                                                                                                                                                                                                                                                                                                                       |                         |
| 41 |                                 |     |                                                                                                                                                                                                                                                                                                                                       |                         |
| 42 |                                 |     |                                                                                                                                                                                                                                                                                                                                       |                         |

|    |                               |     |                                                                                                                                                                                                                                                                                     |                         |
|----|-------------------------------|-----|-------------------------------------------------------------------------------------------------------------------------------------------------------------------------------------------------------------------------------------------------------------------------------------|-------------------------|
| 1  | Consent or assent             | 26a | Who will obtain informed consent or assent from potential trial participants or authorised surrogates, and how (see Item 32)                                                                                                                                                        | 10, supplemental file 3 |
| 2  |                               |     |                                                                                                                                                                                                                                                                                     |                         |
| 3  |                               |     |                                                                                                                                                                                                                                                                                     |                         |
| 4  |                               | 26b | Additional consent provisions for collection and use of participant data and biological specimens in ancillary studies, if applicable                                                                                                                                               | N/A                     |
| 5  |                               |     |                                                                                                                                                                                                                                                                                     |                         |
| 6  |                               |     |                                                                                                                                                                                                                                                                                     |                         |
| 7  | Confidentiality               | 27  | How personal information about potential and enrolled participants will be collected, shared, and maintained in order to protect confidentiality before, during, and after the trial                                                                                                | 15                      |
| 8  |                               |     |                                                                                                                                                                                                                                                                                     |                         |
| 9  |                               |     |                                                                                                                                                                                                                                                                                     |                         |
| 10 | Declaration of interests      | 28  | Financial and other competing interests for principal investigators for the overall trial and each study site                                                                                                                                                                       | 24                      |
| 11 |                               |     |                                                                                                                                                                                                                                                                                     |                         |
| 12 |                               |     |                                                                                                                                                                                                                                                                                     |                         |
| 13 | Access to data                | 29  | Statement of who will have access to the final trial dataset, and disclosure of contractual agreements that limit such access for investigators                                                                                                                                     | 15                      |
| 14 |                               |     |                                                                                                                                                                                                                                                                                     |                         |
| 15 |                               |     |                                                                                                                                                                                                                                                                                     |                         |
| 16 |                               |     |                                                                                                                                                                                                                                                                                     |                         |
| 17 | Ancillary and post-trial care | 30  | Provisions, if any, for ancillary and post-trial care, and for compensation to those who suffer harm from trial participation                                                                                                                                                       | Supplemental file 3     |
| 18 |                               |     |                                                                                                                                                                                                                                                                                     |                         |
| 19 |                               |     |                                                                                                                                                                                                                                                                                     |                         |
| 20 | Dissemination policy          | 31a | Plans for investigators and sponsor to communicate trial results to participants, healthcare professionals, the public, and other relevant groups (eg, via publication, reporting in results databases, or other data sharing arrangements), including any publication restrictions | 18                      |
| 21 |                               |     |                                                                                                                                                                                                                                                                                     |                         |
| 22 |                               |     |                                                                                                                                                                                                                                                                                     |                         |
| 23 |                               |     |                                                                                                                                                                                                                                                                                     |                         |
| 24 |                               | 31b | Authorship eligibility guidelines and any intended use of professional writers                                                                                                                                                                                                      | 18                      |
| 25 |                               |     |                                                                                                                                                                                                                                                                                     |                         |
| 26 |                               | 31c | Plans, if any, for granting public access to the full protocol, participant-level dataset, and statistical code                                                                                                                                                                     | 18                      |
| 27 |                               |     |                                                                                                                                                                                                                                                                                     |                         |
| 28 |                               |     |                                                                                                                                                                                                                                                                                     |                         |
| 29 | <b>Appendices</b>             |     |                                                                                                                                                                                                                                                                                     |                         |
| 30 |                               |     |                                                                                                                                                                                                                                                                                     |                         |
| 31 | Informed consent materials    | 32  | Model consent form and other related documentation given to participants and authorised surrogates                                                                                                                                                                                  | Supplemental file 3     |
| 32 |                               |     |                                                                                                                                                                                                                                                                                     |                         |
| 33 |                               |     |                                                                                                                                                                                                                                                                                     |                         |
| 34 | Biological specimens          | 33  | Plans for collection, laboratory evaluation, and storage of biological specimens for genetic or molecular analysis in the current trial and for future use in ancillary studies, if applicable                                                                                      | N/A                     |
| 35 |                               |     |                                                                                                                                                                                                                                                                                     |                         |
| 36 |                               |     |                                                                                                                                                                                                                                                                                     |                         |

\*It is strongly recommended that this checklist be read in conjunction with the SPIRIT 2013 Explanation & Elaboration for important clarification on the items. Amendments to the protocol should be tracked and dated. The SPIRIT checklist is copyrighted by the SPIRIT Group under the Creative Commons "[Attribution-NonCommercial-NoDerivs 3.0 Unported](https://creativecommons.org/licenses/by-nc-nd/3.0/)" license.



# Trial subject information for participation in medical-scientific trials

## Additional oxygen for BPD

“Supplemental oxygen in children with bronchopulmonary dysplasia (BPD) following the neonatal intensive care period: the SOS BPD study”

### Introduction

Dear Sir/Madam,

You are receiving this letter because your child has bronchopulmonary dysplasia (BPD) and requires supplemental oxygen. We kindly request that you allow your child to take part in a medical-scientific trial. Participation is on a voluntary basis. To take part, you will have to give us consent in writing.

Before you decide whether or not to take part in the trial, we will explain what exactly the trial entails. Please read this information through carefully and ask the researcher for further explanation if you have any questions. Alternatively, you can ask the independent expert, specified at the bottom of this letter, for additional information. You may also discuss it with your partner, friends or family.

Further information about participating in trials can be found on the website of the Rijksoverheid: [www.rijksoverheid.nl/mensenonderzoek](http://www.rijksoverheid.nl/mensenonderzoek).

### 1. General information

This trial has been set up by paediatricians from the Sophia Children’s Hospital (Rotterdam), the Emma Children’s Hospital (Amsterdam) and the Beatrix Children’s Hospital (Groningen) and is being conducted by paediatricians in different hospitals across the country.

This trial requires 198 children from the Netherlands who have BPD. The Erasmus MC medical ethics review committee has approved this trial. General information about reviewing trials can be found in the ‘Medical-scientific trials’ brochure.

### 2. Aim of the trial

The aim of this trial is to find out what the best lower saturation limit (‘the oxygen content in the blood’) is to withdraw supplemental oxygen from children with BPD. In this trial, we are comparing a lower limit of 90% with a lower limit of 95%. Or, is it better to keep the saturation higher or the same as 95% or is 90% just as good?

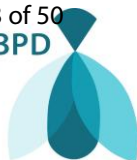

### 3. Background to the trial

Supplemental oxygen is the main treatment for children with BPD. However, it has never been investigated what a safe lower saturation limit is in children with BPD after the first few weeks of life, from week 36 of the pregnancy onwards. Both too much and too little oxygen can have serious consequences. Too little oxygen can lead to poorer increase in weight and thereby also poorer lung development and more lung complaints. Too little oxygen can also lead to a higher risk of cot death and be detrimental to development. Too much oxygen is also harmful to the lungs and brain, especially in premature children. Most hospitals observe a lower saturation limit of 90%; however, international guidelines advise 93-95%. But the higher the lower saturation limit should be, the longer children are given additional oxygen and the more frequently they will go home with it.

### 4. What participation entails

If you wish to allow your child to take part in the trial, we will follow your child's progress up to 1 year after the due date of the pregnancy.

#### When is your child able to participate?

Your child may take part in the trial from the moment that the pregnancy would have reached 36 weeks onwards. At that time, your child should still require supplemental oxygen, otherwise he or she will not be able to take part. The children participating in the trial are randomly distributed between 2 groups: in one group, we withdraw the supplemental oxygen at a lower limit of 90%; in the other group, at a lower limit of 95%. Fate decides in what group your child ends up; you and the physicians and researchers don't have any influence over this.

#### Visits and measurements

The trial will take 1 year to complete. During that year, you will visit the hospital twice, when your child is 6 and 12 months of age respectively. These are the standard visits that always take place after (extreme) prematurity, even if you aren't taking part in the trial. The visit will take around 1 hour. During each visit, we will weigh and measure your child and ask about lung complaints, hospital admissions and doctors' visits. Part of the standard treatment in some hospitals includes: a lung function test (by wearing a mask on the face), a CT scan, a sleep study and/or an ultrasound of the heart. The physician treating your child will tell you whether this happens in your hospital too. If your child takes part in the SOS BPD trial, the visit to the outpatients' clinic won't be any different or longer than it usually would be. We will, however, collect the data from the visits for the trial.

In addition to the standard outpatient visits, we will also ask you to answer a number of questions 3 times before the trial by means of a questionnaire sent to you via the internet. This will happen at the beginning of the study, when your child is 6 months old and when your child is 12 months old. The questionnaire will take around 20 minutes to complete. You will also receive a monthly e-mail asking whether your child has been ill, has been given any medication or has been admitted to hospital recently. You will also have the opportunity to make notes on a secure page on the trial website.

1  
2  
3  
4  
5 As long as your child is receiving supplemental oxygen, we will ask your physician or yourself  
6 (if your child is going home with oxygen) to actively withdraw the oxygen. Oxygen is usually  
7 withdrawn in consultation between you and the physician treating your child. For the trial, we  
8 will ask you or the physician treating your child to download the saturations from the  
9 saturation meter twice a week (or once a week if your child is at home with oxygen) and to e-  
10 mail the readings to the researchers. This will be explained to you if you decide to take part in  
11 the trial. If the downloaded data reveal that your child is exceeding the lower limit of 90 or  
12 95% too frequently, we will ask the doctor or you to withdraw the oxygen faster. It may also  
13 become apparent that your child is falling under the lower limit just that bit too frequently, in  
14 which case we will ask you or your doctor to turn the oxygen level up.  
15  
16  
17  
18

### 19 **Different to the usual care**

20 The visits at 6 and 12 months are standard visits. At this age, all premature children are  
21 monitored in the neonatal centre, so these do not constitute additional visits. The  
22 questionnaires and the monthly e-mails are additional, however. What's more, the  
23 adjustments to your child's oxygen are also different: this happens using the data from the  
24 saturation meter which we will ask you to download.  
25  
26  
27  
28

### 29 **5. What is expected of you?**

30 Participation in the trial means:

- 31 - That we will ask you and your doctor to observe the agreed saturation limit
- 32 - That we will ask you to keep a note of any admissions, doctors' visits and complaints
- 33 in an online diary
- 34 - That in some hospitals, an additional test will be conducted: a lung function test
- 35 which involves wearing a mask on the face.  
36  
37  
38  
39

### 40 **6. Potential detrimental effects**

41 This trial is being conducted because we don't know what's best for children with BPD: a  
42 lower limit of 90% or of 95%. Most hospitals currently maintain a lower limit of 90%. The  
43 benefit of this is that children are able to stop taking oxygen more quickly and don't go home  
44 with oxygen as frequently. The disadvantage could be that children and their lungs don't grow  
45 as well. Too low a volume of oxygen could also affect development. The advantage of a  
46 lower limit of 95% is that we expect children to grow better and therefore develop more  
47 healthy lung tissue. The disadvantage is that children are given additional oxygen for longer  
48 and will go home with it more frequently. Too much oxygen can also be harmful to the lungs.  
49  
50  
51  
52  
53  
54  
55  
56

### 57 **7. Potential advantages and disadvantages**

58  
59  
60

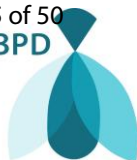

1  
2  
3 It is important that you weigh up the potential advantages and disadvantages carefully before  
4 deciding to take part. A higher lower limit for the oxygen may cause growth/lung growth to  
5 improve, but this isn't guaranteed.  
6  
7

8 Disadvantages of participating in the trial are: potential detrimental effects on the trial  
9 measurements.  
10

11 Participation in the trial also means:

- 12 - the child may have to use oxygen at home for longer
- 13 - that you will have agreements (in relation to the lower oxygen limit, in particular) that  
14 you will have to observe.  
15  
16  
17  
18

19 It is important that you weigh up the potential advantages and disadvantages carefully before  
20 deciding to take part.  
21  
22

## 23 **8. Your child's resistance**

24 Your child could be resistant (refuse to cooperate) during the trial, in which case, the  
25 researcher would have to stop the trial straight away. It is difficult to describe exactly what  
26 resistance is. Before the start of the trial, we will discuss with you what is understood by  
27 resistance. The researcher will abide by the Code of Conduct for the Resistance of Under-  
28 Aged Patients.  
29  
30  
31  
32

## 33 **9. If you do not wish to participate in or wish to stop the trial**

34 It is up to you whether your child takes part in the trial. Participation is entirely voluntary in  
35 nature.  
36

37 If you do not want your child to take part, your child will be treated for BPD in the usual  
38 manner. That means that the doctor treating your child will decide the lower saturation limit  
39 with you.  
40  
41  
42

43 If you do decide to participate, you can change your mind at any time and stop, even during  
44 the trial. Once again, your child will be treated the usual way without having to state your  
45 reasons for doing so. However, you will need to report this to the researcher straight away.  
46 The data that has been collected up to that moment will be used for the trial.  
47  
48

49 If there is new information about the trial that is important for you, please allow the researcher  
50 to tell you. You will then be asked whether you wish to continue to take part.  
51  
52

## 53 **10. End of the trial**

54 Your child's participation in the trial will stop once:

- 55 - all visits are over
- 56 - you yourself decide to stop
- 57 - the researcher or your child's doctor thinks it's better if your child stops  
58  
59  
60

- the authorities or the assessing medical ethics review committee decides to stop the trial.

The entire trial is over once all participants have finished. After processing all the data, the researcher will notify you of the main results of the trial. Because the entire trial takes three-and-a-half years to complete, it can take a while before you can expect the results.

## 11. Use and retention of your child’s data

For this trial, it is necessary to collect and use medical and personal data relating to your child. This is necessary to answer the questions asked in this trial and to publish the results.

### Confidentiality of your child’s data

To protect your child’s privacy, each trial subject is given a code which is stated on the data. The name and other personal data that could be used to identify your child are omitted. The researcher is the only person who knows your child’s code. The key for the code remains with the researcher. Even in reports about the trial, only that code is used.

### Access to the data

Some people may view your child’s medical and personal data to verify whether the trial has been conducted properly and reliably. General information about this can be found in the ‘Medical-scientific trials’ brochure.

People who are able to view your data are: the research team, the safety committee monitoring the trial, an auditor who has been brought in by the researchers of the trial and the Dutch Health Care Inspectorate. They will keep your data confidential. When you sign the consent form, you are consenting to the collection, retention and viewing of your medical and personal data.

### Data retention period

The researcher will retain your child’s data for a period of 15 years in accordance with the statutory retention period.

### Withdrawing consent

You can withdraw your consent to the use of personal data again at any time. This applies both to this trial and to its retention and use for any future trials. Trial data collected up to the moment you withdraw your consent will then still be used in the research.

### Further information about your rights when processing data

For general information about your rights when processing your personal data, you may consult the Dutch Data Protection Authority’s website ([www.autoriteitpersoonsgegevens.nl](http://www.autoriteitpersoonsgegevens.nl)).

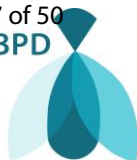

1  
2  
3  
4  
5  
6  
7  
8  
9  
10  
11  
12  
13  
14  
15  
16  
17  
18  
19  
20  
21  
22  
23  
24  
25  
26  
27  
28  
29  
30  
31  
32  
33  
34  
35  
36  
37  
38  
39  
40  
41  
42  
43  
44  
45  
46  
47  
48  
49  
50  
51  
52  
53  
54  
55  
56  
57  
58  
59  
60

If you have any questions about your rights, please contact the data controller responsible for the processing of your personal data, See enclosure A for contact details.

If you have any questions or complaints about the processing of your personal data, we advise contacting the trial location in the first instance. You may also contact the Data Protection Officer at the Erasmus MC or the Dutch Data Protection Authority.

### **Registration of the clinical trial**

This trial also appears in a list of medical-scientific trials, namely the trial register ([www.trialregister.nl](http://www.trialregister.nl); trial code 7347). This website doesn't contain any information that can be traced back to your child. However, the website may show a summary of the results. General information about registering trials can be found in the 'Medical-scientific trials' brochure.

### **12. Insurance for trial subjects**

Appropriate insurance will be taken out for everyone who decides to enter this trial. The insurance covers damage caused by the trial. It does not cover all damage. **Enclosure B** contains further information about the insurance, including who you can report damage to.

### **13. Notifying the GP and/or treating specialist**

We always send your child's GP and/or treating paediatrician a letter to tell them that your child is taking part in the trial. This is for your child's own safety. If you do not agree to this, your child will not be able to take part in this trial. The GP or paediatrician will also receive a letter concerning the 6 and 12-month visits. This is also the norm even if your child is not taking part in the trial.

### **14. No payment for participating**

The additional tests and treatment for the trial won't cost you anything. You will not receive payment for taking part in this trial.

## 15. Any questions?

If you have any questions, please contact the trial team. For independent advice about taking part in this trial, please contact the independent doctor, Dr P.J.F.M. Merkus. He knows a great deal about this trial, but doesn't have anything to do with the trial.

In the event of complaints, please contact the complaints officer at your hospital. All information can be found in **Enclosure A**: Contact details.

## 16. Signing of consent form

Once you have had sufficient thinking time, you will be asked to decide about your child's participation in this trial. If you decide to take part and give consent, please confirm this in writing using the enclosed informed consent form. By giving written consent, you confirm that you have understood the information and agree to take part in the clinical trial.

The signatures page will be retained by the doctor treating your child. You will receive a copy of this consent form.

Thank you for taking the time to read this letter.

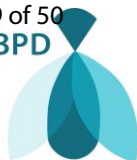

1  
2  
3  
4  
5  
6  
7  
8  
9  
10  
11  
12  
13  
14  
15  
16  
17  
18  
19  
20  
21  
22  
23  
24  
25  
26  
27  
28  
29  
30  
31  
32  
33  
34  
35  
36  
37  
38  
39  
40  
41  
42  
43  
44  
45  
46  
47  
48  
49  
50  
51  
52  
53  
54  
55  
56  
57  
58  
59  
60

**Enclosures to this information**

- A. Contact details
- B. Information about insurance
- C. Consent form

For peer review only



1  
2  
3  
4  
5  
6  
7  
8  
9  
10  
11  
12  
13  
14  
15  
16  
17  
18  
19  
20  
21  
22  
23  
24  
25  
26  
27  
28  
29  
30  
31  
32  
33  
34  
35  
36  
37  
38  
39  
40  
41  
42  
43  
44  
45  
46  
47  
48  
49  
50  
51  
52  
53  
54  
55  
56  
57  
58  
59  
60

## Enclosure A: contact details for *name hospital*

### Researcher at *name hospital*:

*Local principle investigator.*

Telephone number: xxxxx. E-mail: xxxxxx

### Coordinating researcher:

Ms S.J.A. Balink, research physician at Erasmus MC - Sophia Children's Hospital.

Telephone number: +31 (0)6 500 33994. E-mail: sosbpd@erasmusmc.nl.

### Independent doctor:

Dr P.J.F.M. Merkus, paediatric pulmonologist, Amalia Children's Hospital, Radboud UMC

Nijmegen. Telephone number: +31 (0)24 361 4430. E-mail: Peter.Merkus@radboudumc.nl

### Complaints:

*Hospital format*

### Data Protection Officer:

*Hospital format*

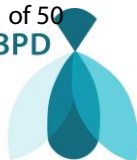

## Enclosure B: information about insurance

Erasmus MC has taken out insurance for everyone taking part in this trial. The insurance covers damage caused as a result of taking part in the trial. This applies to damage caused during the trial or within four years of the end of the trial. Claims must be submitted to the insurer within this four-year period.

This insurance policy does not cover all damage. You will find a brief outline of the exceptions below.

The full version of these provisions are included in the Compulsory Insurance for Medical Research Involving Human Subjects Decree, which can be consulted at [www.ccmo.nl](http://www.ccmo.nl), the website of the Central Committee on Research Involving Human Subjects (go to 'Bibliotheek' and select 'Wet- en regelgeving').

In case of damage, submit your claim directly to the insurer.

The insurer for this clinical trial is:

|                   |                                      |
|-------------------|--------------------------------------|
| Name:             | CNA Insurance Company Limited        |
| Address:          | Polarisavenue 140, 2134 JX Hoofddorp |
| Telephone number: | +31 (0)23 303 6004                   |
| E-mail:           | Esther.vanherk@cnaeurope.com         |
| Policy number:    | 10.220.695                           |
| Contact person:   | Ms Esther Van Herk                   |

The insurance offers coverage of €650,000 per trial subject and €5,000,000 for the entire trial and €7,500,000 per year for all trials conducted by the Erasmus MC.

The following damage is **not** covered by the insurance policy:

- damage caused by a risk of which you were informed in the written information. This does not apply if the materialisation of the risk is more severe than foreseen or if materialisation of the risk was highly unlikely.
- damage to your health that would also have materialised if you had not entered the clinical trial;
- damage as a result of failure to follow directions or instructions or failure to follow these in full;
- damage to your descendants caused by an adverse effect of the trial on you or your descendants;
- damage caused by an existing treatment method in the case of research into existing treatment methods.

## Enclosure C: Consent form for parents or guardians

### Additional oxygen for BPD

I have been asked to give my consent to my child's participation in this medical-scientific trial:

Name of child: \_\_\_\_\_ Date of birth: \_\_ / \_\_ / \_\_

- I have read the information letter for parents/guardians. I was also able to ask questions. My questions have been answered satisfactorily. I had enough time to decide whether or not to enter my child in the trial.
- I know that participation is voluntary. I also know that I may decide to withdraw my child from the trial at any time, without having to state any reasons for doing so.
- I give my consent to the GP/paediatrician treating my child being informed that my child is taking part in this trial.
- I give my consent to the requesting of information from the paediatrician treating my child concerning my child's hospital admissions.
- I am aware that some people are able to view my child's data. The people in question are specified in this information letter.
- I give my consent to the use of the data in the manner and for the purposes stated in the information letter.
- I give my consent to my child's data being retained at the trial location for a period of 15 years after this trial has finished.
- I give my consent to the use of my e-mail address, only for this trial.
- I  **do\***  
 **do not**  
give my consent to my child being contacted again about a follow-up trial once this trial has ended.
- I agree to my child taking part in this clinical trial.

Name of parent/guardian 1: .....

Signature: \_\_\_\_\_ Date: \_\_ / \_\_ / \_\_

E-mail address: .....

Name of parent/guardian 2: .....

Signature: \_\_\_\_\_ Date: \_\_ / \_\_ / \_\_

E-mail address: .....



1  
2  
3  
4  
5  
6  
7  
8  
9  
10  
11  
12  
13  
14  
15  
16  
17  
18  
19  
20  
21  
22  
23  
24  
25  
26  
27  
28  
29  
30  
31  
32  
33  
34  
35  
36  
37  
38  
39  
40  
41  
42  
43  
44  
45  
46  
47  
48  
49  
50  
51  
52  
53  
54  
55  
56  
57  
58  
59  
60

-----

I hereby declare that I have notified in full the above-mentioned person/persons about the named trial.

If any information were to emerge during the trial that could affect the parent's or guardian's consent, I shall notify him/her in due time.

Clinical researcher's name (or his/her representative):

Signature:

Date: \_\_ / \_\_ / \_\_

-----

Additional information has been provided by:

Name:

Position:

Signature

Date: \_\_ / \_\_ / \_\_

-----

\* Place a cross next to that which is applicable.

For peer review only

## Supplemental material file 4

### Weaning of supplemental oxygen and respiratory support

#### Continuous positive airway pressure (CPAP)

The available methods of weaning CPAP are:

1. Withdrawal of CPAP (to room air or nasal cannula/low flow with oxygen)
2. Gradually reduce time on CPAP, i.e. alternating hours without CPAP with hours on CPAP
3. Gradually reduce pressure on CPAP, for example from 6 cm H<sub>2</sub>O to 5, to 4 cm H<sub>2</sub>O.

A systematic review [1] shows that none of these methods leads to better outcomes.

Gradual reduction may be preferable.

The optimal FiO<sub>2</sub> from which weaning can be performed with CPAP has not been defined. Successful weaning is unlikely in children who need >40% oxygen [2].

|        |                                                                                                                                                                                                                                                                                                                                                                                                                                                                       |
|--------|-----------------------------------------------------------------------------------------------------------------------------------------------------------------------------------------------------------------------------------------------------------------------------------------------------------------------------------------------------------------------------------------------------------------------------------------------------------------------|
| Step 1 | Weaning from CPAP based on local protocol.                                                                                                                                                                                                                                                                                                                                                                                                                            |
| Step 2 | <p>If there is no local protocol to wean from CPAP, then the following is advised:</p> <ul style="list-style-type: none"> <li>- If FiO<sub>2</sub> &gt; 30%, first decrease FiO<sub>2</sub> in steps of 5%, maximal 1 step per 12 hours.</li> <li>- If increase in desaturations, then increase FiO<sub>2</sub> until child is stable at/above saturation limit.</li> <li>- If FiO<sub>2</sub> is stable during 24 hours and ≤ 30%, then proceed to step 3</li> </ul> |
| Step 3 | <p>Gradually decrease the pressure of the CPAP to 3-4 cm H<sub>2</sub>O and then discontinue.</p> <ul style="list-style-type: none"> <li>- Decrease per step by 1 cm H<sub>2</sub>O</li> <li>- A maximum of 1 step per 24 hours is advised</li> </ul> <p>After discontinuation of CPAP, there is no additional support required unless there is an increased work of breathing. You can then start with low flow.</p>                                                 |

### Heated Humidified High Flow Nasal Cannula (HHHFNC)

There is no evidence on how to taper off HHHFNC [3]. The following recommendations are based on expert opinion [4]:

- Wean first FiO<sub>2</sub>, then flow rate. Weaning is more likely to be successful in children who get less than 30% FiO<sub>2</sub>.
- Wean 1 L/min every 12 hours, guided by the child's work of breathing
- Consider discontinuing at flow rates between 2-4 L/min (lowest amount of flow is device dependent). There is no evidence (yet) about the benefits of HHHFNC on flow rates less than 3 L/min.

|        |                                                                                                                                                                                                                                                                                                                                                                                                                                                 |
|--------|-------------------------------------------------------------------------------------------------------------------------------------------------------------------------------------------------------------------------------------------------------------------------------------------------------------------------------------------------------------------------------------------------------------------------------------------------|
| Step 1 | Weaning from HHHFNC based on local protocol.                                                                                                                                                                                                                                                                                                                                                                                                    |
| Step 2 | <p>If there is no local protocol to wean from HHHFNC, then the following is advised:</p> <ul style="list-style-type: none"> <li>- First decrease FiO<sub>2</sub> to &lt; 30%.</li> <li>- Decrease flow with 1 L/min, maximal 2 steps per 24 hours. Consider steps of 0.5 L/min if increased work of breathing.</li> <li>- Wean to 2 L/min and 30% FiO<sub>2</sub>, then stop HHHFNC. Low flow supplemental oxygen may be considered.</li> </ul> |

### Low flow supplemental oxygen (< 2 L/min)

There are no guidelines or RCTs known regarding the reduction of low flow support in newborns. Some societies do make a cautious recommendation about discontinuation of support, including the British Thoracic Society and the Thoracic Society of Australia and New Zealand [5-8].

With regard to the cessation of oxygen support, it is stated that hypoxia is likely most common during feedings and sleeping. That is why it is recommended first to discontinue O<sub>2</sub> support during waking episodes and expand from there during sleep.

|        |                                                                                                                                                                                                                                                                                                                                                                                                  |
|--------|--------------------------------------------------------------------------------------------------------------------------------------------------------------------------------------------------------------------------------------------------------------------------------------------------------------------------------------------------------------------------------------------------|
| Step 1 | Weaning from low flow based on local protocol.                                                                                                                                                                                                                                                                                                                                                   |
| Step 2 | <p>If there is no local protocol to wean from low flow O<sub>2</sub>, then the following is advised:</p> <ul style="list-style-type: none"> <li>- reduce with 0.5 L/min per step till 1 L/min.</li> <li>- If flow 1 L/min, consider to switch to nasal prongs with 100% FiO<sub>2</sub>.</li> <li>- If flow ≤ 1 L/min, decrease with 0.1 L/min per step to minimal flow of 0.1 L/min.</li> </ul> |
| Step 3 | <p>If on 0.1 L/min 100% O<sub>2</sub> further steps are:</p> <ul style="list-style-type: none"> <li>- Stop low flow during awake periods for a max of 3 hours.</li> <li>- Increase time without supplemental oxygen when awake</li> <li>- Stop low flow during the day (including sleep periods during the day)</li> <li>- Stop low flow</li> </ul>                                              |

### Increasing supplemental oxygen and respiratory support

If the saturation profile shows that the child is below the SpO<sub>2</sub> target 10% of the time or more, then respiratory support should be intensified.

Also if parents or treating physicians observe frequent desaturations outside a measurement period (saturation profile), then the support should be intensified.

|        |                                               |                                                                                                                                                                                                                                             |
|--------|-----------------------------------------------|---------------------------------------------------------------------------------------------------------------------------------------------------------------------------------------------------------------------------------------------|
| Step 1 |                                               | Go back to the last step before weaning                                                                                                                                                                                                     |
| Step 2 |                                               | If insufficient effect, next steps are dependent on the type of respiratory support.                                                                                                                                                        |
|        | CPAP                                          | <ul style="list-style-type: none"> <li>- Increase FiO<sub>2</sub> with steps of 5% to max of 40% until a stable situation is reached</li> <li>- If FiO<sub>2</sub> &gt; 40 is needed, increase pressure with 1 cm H<sub>2</sub>O</li> </ul> |
|        | HHHFNC                                        | <ul style="list-style-type: none"> <li>- Increase FiO<sub>2</sub> with steps of 5% to max of 40% until a stable situation is reached</li> <li>- If FiO<sub>2</sub> &gt; 40 is needed, increase flow with 1 L/min</li> </ul>                 |
|        | Low flow 1-2 L/min, variable FiO <sub>2</sub> | <ul style="list-style-type: none"> <li>- Increase FiO<sub>2</sub> with steps of 5% to max of 40% until a stable situation is reached</li> <li>- If FiO<sub>2</sub> &gt; 40 is needed, increase flow with 0.5 L/min</li> </ul>               |
|        | Low flow 0.1-1 L/min FiO <sub>2</sub> 100%    | <ul style="list-style-type: none"> <li>- Increase flow with 0.1 L/min until a stable situation is reached</li> </ul>                                                                                                                        |



## References

1. Amatya S, Rastogi D, Bhutada A, Rastogi S: Weaning of nasal CPAP in preterm infants: who, when and how? a systematic review of the literature. *World J Pediatr* 2015, 11(1):7-13.
2. Abdel-Hady H, Shouman B, Nasef N: Weaning preterm infants from continuous positive airway pressure: evidence for best practice. *World J Pediatr* 2015, 11(3):212- 218.
3. Farley RC, Hough JL, Jardine LA: Strategies for the discontinuation of humidified high flow nasal cannula (HHFNC) in preterm infants. *Cochrane Database Syst Rev* 2015(6):CD011079.
4. Roehr CC, Yoder BA, Davis PG, Ives K: Evidence Support and Guidelines for Using Heated, Humidified, High-Flow Nasal Cannulae in Neonatology: Oxford Nasal High-Flow Therapy Meeting, 2015. *Clin Perinatol* 2016, 43(4):693-705.
5. Balfour-Lynn IM, Field DJ, Gringras P, Hicks B, Jardine E, Jones RC, Magee AG, Primhak RA, Samuels MP, Shaw NJ et al: BTS guidelines for home oxygen in children. *Thorax* 2009, 64 Suppl 2:ii1-26.
6. Adde FV, Alvarez AE, Barbisan BN, Guimaraes BR: Recommendations for long-term home oxygen therapy in children and adolescents. *J Pediatr (Rio J)* 2013, 89(1):6-17.
7. Primhak R: Oxygen titration strategies in chronic neonatal lung disease. *Paediatr Respir Rev* 2010, 11(3):154-157.
8. Thoracic Society of A, New Z, Fitzgerald DA, Massie RJ, Nixon GM, Jaffe A, Wilson A, Landau LI, Twiss J, Smith G et al: Infants with chronic neonatal lung disease: recommendations for the use of home oxygen therapy. *Med J Aust* 2008, 189(10):578-582

## Supplemental file 5: Audit frequency and procedures

### Monitoring frequency

| Visit no.                                                            | Selected Sites              | Planning*                                                                                                                                                                      |
|----------------------------------------------------------------------|-----------------------------|--------------------------------------------------------------------------------------------------------------------------------------------------------------------------------|
| Initiation Visit                                                     | All                         | Before enrolment of the first subject, but after Ethics Committee and Board of Deans approval has been obtained.                                                               |
| First Monitoring Visit A                                             | All participating sites     | After 2 - 3 randomised subjects, irrespective of (e)CRF completion.                                                                                                            |
| First Monitoring Visit B                                             | All 10 NICUs                | Only if not including subjects so when Visit A has not been performed.<br>After 5 - 6 randomised subjects have completed the 6 month visit, irrespective of (e)CRF completion. |
| Remote Visit                                                         | All sites                   | Contact via telephone or email approximately 12 weeks after the First Monitoring Visit A or B                                                                                  |
| Second Monitoring Visit                                              | 5 high recruiting sites     | After all subjects have been randomised, the 5 sites who have randomised the most subjects                                                                                     |
| Remote Visit                                                         | All 5 high recruiting sites | Contact via telephone or email approximately 12 weeks after the Second Monitoring Visit                                                                                        |
| Remote Close Out                                                     | All sites                   | After database lock                                                                                                                                                            |
| TMF check in combinations with check on 6 months FU data if possible | Sponsor site                | In 2019 and 2022                                                                                                                                                               |

\*The frequency may be changed based on the total enrolment period, the inclusion rate, quality issues and/ or site performance, but only after consultation with the Coordinating PI.

### Monitoring procedures

The follow items will be discussed/ verified by the Clinical Research Associate (CRA) during the different visits.

#### *First Monitoring Visit*

- Who is/ are the contact person(s) at site

- 1
- 2
- 3
- 4
- 5
- 6
- 7
- 8
- 9
- 10
- 11
- 12
- 13
- 14
- 15
- 16
- 17
- 18
- 19
- 20
- 21
- 22
- 23
- 24
- 25
- 26
- 27
- 28
- 29
- 30
- 31
- 32
- 33
- 34
- 35
- 36
- 37
- 38
- 39
- 40
- 41
- 42
- 43
- 44
- 45
- 46
- 47
- 48
- 49
- 50
- 51
- 52
- 53
- 54
- 55
- 56
- 57
- 58
- 59
- 60
- Is the entire investigators' study staff adequately informed about the study e.g. randomisation procedure, sample collection, procedures in case of protocol deviations/ serious breaches, SAE notification procedures etc.
- Is the entire investigators' study staff WMO/GCP trained and authorized (site signature and delegation log)
- Has the study staff sufficient time to perform the study?
- How and by whom is the subject informed about the study?
- By whom is consent obtained and is it properly documented?
- Who will examine the subject every visit?
- Who performs the screening, baseline and other visits/ how is this arranged?
- Which source documents are available?
- Source Data Review
- Source Data Verification
- Where is the source data stored?
- Who will maintain the subject identification code list/ screening log/ enrolment log?
- Who is completing the (e)CRF?
- When/ how/ where and by who are questionnaires filled in?
- Which facilities are used (any changes)?
- Which equipment is used (any changes)?
- Have any Serious Adverse Events (SAEs) occurred?
- Reporting of SAE's
- Are there any known protocol deviations and/ or serious breaches of ICH-GCP and/ or protocol?
- Is the Trial Master File/ Investigator Site File up to date (AMC SOP CTR 006/ ICH-GCP guideline 8.1 – 8.3)?
- What is the expected recruitment rate?
- Competitive studies running?
- Informed consent process, use of Patient Information Form and Informed Consent form
- In- and exclusion criteria

### ***Remote Visits***

- Discuss progress of follow-up of action items
- Is the enrolment overview up to date (amount screened subjects, amount of screen failures/withdrawn subjects, amount of randomised/enrolled subjects, amount of active subjects, amount of subjects in follow-up and amount of subjects that have completed the trial)?
- Are there any changes in the investigators' study staff (trained and authorized)?
- Are there any changes in facilities or equipment?
- Have any SAEs been reported since previous on-site monitor visit?
- Are there any known protocol deviations and/or serious breaches of ICH-GCP and/or protocol?

### ***Ongoing Monitoring Visits***

- Is the entire investigators' study staff adequately informed about the study?

- 1
  - 2
  - 3
  - 4
  - 5
  - 6
  - 7
  - 8
  - 9
  - 10
  - 11
  - 12
  - 13
  - 14
  - 15
  - 16
  - 17
  - 18
  - 19
  - 20
  - 21
  - 22
  - 23
  - 24
  - 25
  - 26
  - 27
  - 28
  - 29
  - 30
  - 31
  - 32
  - 33
  - 34
  - 35
  - 36
  - 37
  - 38
  - 39
  - 40
  - 41
  - 42
  - 43
  - 44
  - 45
  - 46
  - 47
  - 48
  - 49
  - 50
  - 51
  - 52
  - 53
  - 54
  - 55
  - 56
  - 57
  - 58
  - 59
  - 60
- Is the entire investigators' study staff WMO/GCP trained and authorized (site signature and delegation log)
  - Are there any changes in the investigators' study staff (trained and authorized)?
  - Are there any changes in facilities or equipment?
  - Is the investigational medicinal product accountability properly documented?
  - Have any SAEs occurred?
  - Are there any known protocol deviations and/or serious breaches of ICH-GCP and/or protocol?
  - Is the Trial Master File/ Investigator Site File up to date (AMC SOP CTR 006/ICH-GCP guideline 8.1 – 8.3)?
  - Are there any new amendments in place?

For peer review only
