# Supplementary material for: Supplemental oxygen strategies in infants with bronchopulmonary dysplasia after the neonatal intensive care unit period: study protocol for a randomised controlled trial (SOS BPD study)
Source: PubMed Central journal article supplement — BMJ Open. 2022 Jul 8;12(7):e060986. doi: 10.1136/bmjopen-2022-060986 (PMC9272124; doi:10.1136/bmjopen-2022-060986), 2022-07-08
Supplement: bmjopen-2022-060986supp001.pdf [file bmjopen-2022-060986supp001.pdf]

**List of participating hospitals in the SOS BPD trial**

All sites, participating in the SOS BPD trial, at the time of submission of the trial protocol:

| <b>Hospital</b>                                               | <b>Location</b> | <b>Local principal investigator</b> |
|---------------------------------------------------------------|-----------------|-------------------------------------|
| Albert Schweitzer Hospital                                    | Dordrecht       | M. de Jong                          |
| Amphia Hospital                                               | Breda           | A.R. Hulsmann                       |
| Amsterdam University Medical Centers – Locations AMC and VuMC | Amsterdam       | A.H. van Kaam, W. Onland            |
| Deventer Hospital                                             | Deventer        | A.C.M. Dassel                       |
| Elisabeth-Tweesteden Hospital                                 | Tilburg         | J.C.R. van Hoften                   |
| Erasmus MC – Sophia Children's Hospital                       | Rotterdam       | M.W.H. Pijnenburg, A.A. Kroon       |
| Flevo Hospital                                                | Almere          | C.E. Counsilman                     |
| Franciscus Gasthuis & Vlietland                               | Rotterdam       | A. Kamerbeek                        |
| Groene Hart Hospital                                          | Gouda           | J.S. von Lindern                    |
| Haga Hospital                                                 | Den Haag        | A.M. de Grauw                       |
| Isala Women and Children's Hospital                           | Zwolle          | E.E.M. Mulder                       |
| Leiden University Medical Center                              | Leiden          | R.N.G.B. Tan                        |
| Maasstad Hospital                                             | Rotterdam       | M.G.A. Baartmans                    |
| Maastricht University Medical Center                          | Maastricht      | E. Villamor                         |
| Martini Hospital                                              | Groningen       | H.D. Bouter                         |
| Maxima Medical Center                                         | Veldhoven       | H.J. Niemarkt                       |
| Meander Medical Center                                        | Amersfoort      | C.A. Dalen Meurs                    |
| Medical Center Leeuwarden                                     | Leeuwarden      | M.A.G. van Scherpenzeel - de Vries  |
| Medisch Spectrum Twente                                       | Enschede        | L.G.M. van Rooij                    |
| Noordwest Hospitalgroup                                       | Alkmaar         | G.J. Blok                           |
| OLVG                                                          | Amsterdam       | A.A.M.W. van Kempen                 |
| Radboud University Medical Center                             | Nijmegen        | W.P. de Boode                       |
| Reinier de Graaf Gasthuis                                     | Delft           | L.H. van der Meer                   |
| Rijnstate Hospital                                            | Arnhem          | C.H. ten Hove                       |
| Spaarne Gasthuis                                              | Haarlem         | I.A.M. Schiering                    |
| St. Antonius Hospital                                         | Nieuwegein      | J.L.A.M. van Hillegersberg          |
| University Medical Center Groningen                           | Groningen       | P.H. Dijk                           |
| Viecuri Medical Center                                        | Venlo           | J.H.L. van Hoorn                    |
| Zuyderland Medical Center                                     | Heerlen         | R.M.J. Moonen                       |

SOS BPD Trial protocol – Supplementary data
