# Supplementary material for: Supplemental oxygen strategies in infants with bronchopulmonary dysplasia after the neonatal intensive care unit period: study protocol for a randomised controlled trial (SOS BPD study)
Source: PubMed Central journal article supplement — BMJ Open. 2022 Jul 8;12(7):e060986. doi: 10.1136/bmjopen-2022-060986 (PMC9272124; doi:10.1136/bmjopen-2022-060986), 2022-07-08
Supplement: bmjopen-2022-060986supp004.pdf [file bmjopen-2022-060986supp004.pdf]

**Supplemental material file 4****Weaning of supplemental oxygen and respiratory support**Continuous positive airway pressure (CPAP)

The available methods of weaning CPAP are:

1. Withdrawal of CPAP (to room air or nasal cannula/low flow with oxygen)
2. Gradually reduce time on CPAP, i.e. alternating hours without CPAP with hours on CPAP
3. Gradually reduce pressure on CPAP, for example from 6 cm H<sub>2</sub>O to 5, to 4 cm H<sub>2</sub>O.

A systematic review [1] shows that none of these methods leads to better outcomes.

Gradual reduction may be preferable.

The optimal FiO<sub>2</sub> from which weaning can be performed with CPAP has not been defined. Successful weaning is unlikely in children who need >40% oxygen [2].

|        |                                                                                                                                                                                                                                                                                                                                                                                                                                                                       |
|--------|-----------------------------------------------------------------------------------------------------------------------------------------------------------------------------------------------------------------------------------------------------------------------------------------------------------------------------------------------------------------------------------------------------------------------------------------------------------------------|
| Step 1 | Weaning from CPAP based on local protocol.                                                                                                                                                                                                                                                                                                                                                                                                                            |
| Step 2 | <p>If there is no local protocol to wean from CPAP, then the following is advised:</p> <ul style="list-style-type: none"> <li>- If FiO<sub>2</sub> &gt; 30%, first decrease FiO<sub>2</sub> in steps of 5%, maximal 1 step per 12 hours.</li> <li>- If increase in desaturations, then increase FiO<sub>2</sub> until child is stable at/above saturation limit.</li> <li>- If FiO<sub>2</sub> is stable during 24 hours and ≤ 30%, then proceed to step 3</li> </ul> |
| Step 3 | <p>Gradually decrease the pressure of the CPAP to 3-4 cm H<sub>2</sub>O and then discontinue.</p> <ul style="list-style-type: none"> <li>- Decrease per step by 1 cm H<sub>2</sub>O</li> <li>- A maximum of 1 step per 24 hours is advised</li> </ul> <p>After discontinuation of CPAP, there is no additional support required unless there is an increased work of breathing. You can then start with low flow.</p>                                                 |

Heated Humidified High Flow Nasal Cannula (HHHFNC)

There is no evidence on how to taper off HHHFNC [3]. The following recommendations are based on expert opinion [4]:

- Wean first FiO<sub>2</sub>, then flow rate. Weaning is more likely to be successful in children who get less than 30% FiO<sub>2</sub>.
- Wean 1 L/min every 12 hours, guided by the child's work of breathing
- Consider discontinuing at flow rates between 2-4 L/min (lowest amount of flow is device dependent). There is no evidence (yet) about the benefits of HHHFNC on flow rates less than 3 L/min.

|        |                                                                                                                                                                                                                                                                                                                                                                                                                                                 |
|--------|-------------------------------------------------------------------------------------------------------------------------------------------------------------------------------------------------------------------------------------------------------------------------------------------------------------------------------------------------------------------------------------------------------------------------------------------------|
| Step 1 | Weaning from HHHFNC based on local protocol.                                                                                                                                                                                                                                                                                                                                                                                                    |
| Step 2 | <p>If there is no local protocol to wean from HHHFNC, then the following is advised:</p> <ul style="list-style-type: none"> <li>- First decrease FiO<sub>2</sub> to &lt; 30%.</li> <li>- Decrease flow with 1 L/min, maximal 2 steps per 24 hours. Consider steps of 0.5 L/min if increased work of breathing.</li> <li>- Wean to 2 L/min and 30% FiO<sub>2</sub>, then stop HHHFNC. Low flow supplemental oxygen may be considered.</li> </ul> |

Low flow supplemental oxygen (< 2 L/min)

There are no guidelines or RCTs known regarding the reduction of low flow support in newborns. Some societies do make a cautious recommendation about discontinuation of support, including the British Thoracic Society and the Thoracic Society of Australia and New Zealand [5-8].

With regard to the cessation of oxygen support, it is stated that hypoxia is likely most common during feedings and sleeping. That is why it is recommended first to discontinue O<sub>2</sub> support during waking episodes and expand from there during sleep.

|        |                                                                                                                                                                                                                                                                                                                                                                                             |
|--------|---------------------------------------------------------------------------------------------------------------------------------------------------------------------------------------------------------------------------------------------------------------------------------------------------------------------------------------------------------------------------------------------|
| Step 1 | Weaning from low flow based on local protocol.                                                                                                                                                                                                                                                                                                                                              |
| Step 2 | If there is no local protocol to wean from low flow O <sub>2</sub> , then the following is advised: <ul style="list-style-type: none"> <li>- reduce with 0.5 L/min per step till 1 L/min.</li> <li>- If flow 1 L/min, consider to switch to nasal prongs with 100% FiO<sub>2</sub>.</li> <li>- If flow ≤ 1 L/min, decrease with 0.1 L/min per step to minimal flow of 0.1 L/min.</li> </ul> |
| Step 3 | If on 0.1 L/min 100% O <sub>2</sub> further steps are: <ul style="list-style-type: none"> <li>- Stop low flow during awake periods for a max of 3 hours.</li> <li>- Increase time without supplemental oxygen when awake</li> <li>- Stop low flow during the day (including sleep periods during the day)</li> <li>- Stop low flow</li> </ul>                                               |

### Increasing supplemental oxygen and respiratory support

If the saturation profile shows that the child is below the SpO<sub>2</sub> target 10% of the time or more, then respiratory support should be intensified.

Also if parents or treating physicians observe frequent desaturations outside a measurement period (saturation profile), then the support should be intensified.

|        |                                               |                                                                                                                                                                                                                                             |
|--------|-----------------------------------------------|---------------------------------------------------------------------------------------------------------------------------------------------------------------------------------------------------------------------------------------------|
| Step 1 |                                               | Go back to the last step before weaning                                                                                                                                                                                                     |
| Step 2 |                                               | If insufficient effect, next steps are dependent on the type of respiratory support.                                                                                                                                                        |
|        | CPAP                                          | <ul style="list-style-type: none"> <li>- Increase FiO<sub>2</sub> with steps of 5% to max of 40% until a stable situation is reached</li> <li>- If FiO<sub>2</sub> &gt; 40 is needed, increase pressure with 1 cm H<sub>2</sub>O</li> </ul> |
|        | HHHFNC                                        | <ul style="list-style-type: none"> <li>- Increase FiO<sub>2</sub> with steps of 5% to max of 40% until a stable situation is reached</li> <li>- If FiO<sub>2</sub> &gt; 40 is needed, increase flow with 1 L/min</li> </ul>                 |
|        | Low flow 1-2 L/min, variable FiO <sub>2</sub> | <ul style="list-style-type: none"> <li>- Increase FiO<sub>2</sub> with steps of 5% to max of 40% until a stable situation is reached</li> <li>- If FiO<sub>2</sub> &gt; 40 is needed, increase flow with 0.5 L/min</li> </ul>               |
|        | Low flow 0.1-1 L/min FiO <sub>2</sub> 100%    | <ul style="list-style-type: none"> <li>- Increase flow with 0.1 L/min until a stable situation is reached</li> </ul>                                                                                                                        |

## References

1. Amatya S, Rastogi D, Bhutada A, Rastogi S: Weaning of nasal CPAP in preterm infants: who, when and how? a systematic review of the literature. *World J Pediatr* 2015, 11(1):7-13.
2. Abdel-Hady H, Shouman B, Nasef N: Weaning preterm infants from continuous positive airway pressure: evidence for best practice. *World J Pediatr* 2015, 11(3):212- 218.
3. Farley RC, Hough JL, Jardine LA: Strategies for the discontinuation of humidified high flow nasal cannula (HHFNC) in preterm infants. *Cochrane Database Syst Rev* 2015(6):CD011079.
4. Roehr CC, Yoder BA, Davis PG, Ives K: Evidence Support and Guidelines for Using Heated, Humidified, High-Flow Nasal Cannulae in Neonatology: Oxford Nasal High-Flow Therapy Meeting, 2015. *Clin Perinatol* 2016, 43(4):693-705.
5. Balfour-Lynn IM, Field DJ, Gringras P, Hicks B, Jardine E, Jones RC, Magee AG, Primhak RA, Samuels MP, Shaw NJ et al: BTS guidelines for home oxygen in children. *Thorax* 2009, 64 Suppl 2:ii1-26.
6. Adde FV, Alvarez AE, Barbisan BN, Guimaraes BR: Recommendations for long-term home oxygen therapy in children and adolescents. *J Pediatr (Rio J)* 2013, 89(1):6-17.
7. Primhak R: Oxygen titration strategies in chronic neonatal lung disease. *Paediatr Respir Rev* 2010, 11(3):154-157.
8. Thoracic Society of A, New Z, Fitzgerald DA, Massie RJ, Nixon GM, Jaffe A, Wilson A, Landau LI, Twiss J, Smith G et al: Infants with chronic neonatal lung disease: recommendations for the use of home oxygen therapy. *Med J Aust* 2008, 189(10):578-582
