# Supplementary material for: Supplemental oxygen strategies in infants with bronchopulmonary dysplasia after the neonatal intensive care unit period: study protocol for a randomised controlled trial (SOS BPD study)
Source: PubMed Central journal article supplement — BMJ Open. 2022 Jul 8;12(7):e060986. doi: 10.1136/bmjopen-2022-060986 (PMC9272124; doi:10.1136/bmjopen-2022-060986), 2022-07-08
Supplement: bmjopen-2022-060986supp005.pdf [file bmjopen-2022-060986supp005.pdf]

## Supplemental file 5: Audit frequency and procedures

### Monitoring frequency

| Visit no.                                                            | Selected Sites              | Planning*                                                                                                                                                                      |
|----------------------------------------------------------------------|-----------------------------|--------------------------------------------------------------------------------------------------------------------------------------------------------------------------------|
| Initiation Visit                                                     | All                         | Before enrolment of the first subject, but after Ethics Committee and Board of Deans approval has been obtained.                                                               |
| First Monitoring Visit A                                             | All participating sites     | After 2 - 3 randomised subjects, irrespective of (e)CRF completion.                                                                                                            |
| First Monitoring Visit B                                             | All 10 NICUs                | Only if not including subjects so when Visit A has not been performed.<br>After 5 - 6 randomised subjects have completed the 6 month visit, irrespective of (e)CRF completion. |
| Remote Visit                                                         | All sites                   | Contact via telephone or email approximately 12 weeks after the First Monitoring Visit A or B                                                                                  |
| Second Monitoring Visit                                              | 5 high recruiting sites     | After all subjects have been randomised, the 5 sites who have randomised the most subjects                                                                                     |
| Remote Visit                                                         | All 5 high recruiting sites | Contact via telephone or email approximately 12 weeks after the Second Monitoring Visit                                                                                        |
| Remote Close Out                                                     | All sites                   | After database lock                                                                                                                                                            |
| TMF check in combinations with check on 6 months FU data if possible | Sponsor site                | In 2019 and 2022                                                                                                                                                               |

\*The frequency may be changed based on the total enrolment period, the inclusion rate, quality issues and/ or site performance, but only after consultation with the Coordinating PI.

### Monitoring procedures

The follow items will be discussed/ verified by the Clinical Research Associate (CRA) during the different visits.

#### *First Monitoring Visit*

- Who is/ are the contact person(s) at site

Supplemental file – Audit frequency and procedures SOS BPD study

- Is the entire investigators' study staff adequately informed about the study e.g. randomisation procedure, sample collection, procedures in case of protocol deviations/ serious breaches, SAE notification procedures etc.
- Is the entire investigators' study staff WMO/GCP trained and authorized (site signature and delegation log)
- Has the study staff sufficient time to perform the study?
- How and by whom is the subject informed about the study?
- By whom is consent obtained and is it properly documented?
- Who will examine the subject every visit?
- Who performs the screening, baseline and other visits/ how is this arranged?
- Which source documents are available?
- Source Data Review
- Source Data Verification
- Where is the source data stored?
- Who will maintain the subject identification code list/ screening log/ enrolment log?
- Who is completing the (e)CRF?
- When/ how/ where and by who are questionnaires filled in?
- Which facilities are used (any changes)?
- Which equipment is used (any changes)?
- Have any Serious Adverse Events (SAEs) occurred?
- Reporting of SAE's
- Are there any known protocol deviations and/ or serious breaches of ICH-GCP and/ or protocol?
- Is the Trial Master File/ Investigator Site File up to date (AMC SOP CTR 006/ ICH-GCP guideline 8.1 – 8.3)?
- What is the expected recruitment rate?
- Competitive studies running?
- Informed consent process, use of Patient Information Form and Informed Consent form
- In- and exclusion criteria

#### **Remote Visits**

- Discuss progress of follow-up of action items
- Is the enrolment overview up to date (amount screened subjects, amount of screen failures/withdrawn subjects, amount of randomised/enrolled subjects, amount of active subjects, amount of subjects in follow-up and amount of subjects that have completed the trial)?
- Are there any changes in the investigators' study staff (trained and authorized)?
- Are there any changes in facilities or equipment?
- Have any SAEs been reported since previous on-site monitor visit?
- Are there any known protocol deviations and/or serious breaches of ICH-GCP and/or protocol?

#### **Ongoing Monitoring Visits**

- Is the entire investigators' study staff adequately informed about the study?

Supplemental file – Audit frequency and procedures SOS BPD study

- Is the entire investigators' study staff WMO/GCP trained and authorized (site signature and delegation log)
- Are there any changes in the investigators' study staff (trained and authorized)?
- Are there any changes in facilities or equipment?
- Is the investigational medicinal product accountability properly documented?
- Have any SAEs occurred?
- Are there any known protocol deviations and/or serious breaches of ICH-GCP and/or protocol?
- Is the Trial Master File/ Investigator Site File up to date (AMC SOP CTR 006/ICH-GCP guideline 8.1 – 8.3)?
- Are there any new amendments in place?

Supplemental file – Audit frequency and procedures SOS BPD study
